# Supplementary material for: Paediatric prehospital emergencies and restrictions during the COVID-19 pandemic: a population-based study
Source: PubMed Central journal article supplement — BMJ Paediatr Open. 2020 Nov 2;4(1):e000808. doi: 10.1136/bmjpo-2020-000808 (PMC7607513; doi:10.1136/bmjpo-2020-000808), 2020-11-02
Supplement: bmjpo-2020-000808.draft_revisions.pdf [file bmjpo-2020-000808.draft_revisions.pdf]

# BMJ Paediatrics Open

BMJ Paediatrics Open is committed to open peer review. As part of this commitment we make the peer review history of every article we publish publicly available.

When an article is published we post the peer reviewers' comments and the authors' responses online. We also post the versions of the paper that were used during peer review. These are the versions that the peer review comments apply to.

The versions of the paper that follow are the versions that were submitted during the peer review process. They are not the versions of record or the final published versions. They should not be cited or distributed as the published version of this manuscript.

BMJ Paediatrics Open is an open access journal and the full, final, typeset and author-corrected version of record of the manuscript is available on our site with no access controls, subscription charges or pay-per-view fees (<http://bmjpaedsopen.bmj.com>).

If you have any questions on BMJ Paediatrics Open's open peer review process please email [info.bmjpo@bmj.com](mailto:info.bmjpo@bmj.com)

# BMJ Paediatrics Open

## Paediatric prehospital emergencies and restrictions during the COVID-19 pandemic: a population-based study

|                               |                                                                                                                                                                                                                                                                                                                                                                                                                                                                                                                                                                                                                                                                                                                                                                                                                                                                                                                                                                                                                  |
|-------------------------------|------------------------------------------------------------------------------------------------------------------------------------------------------------------------------------------------------------------------------------------------------------------------------------------------------------------------------------------------------------------------------------------------------------------------------------------------------------------------------------------------------------------------------------------------------------------------------------------------------------------------------------------------------------------------------------------------------------------------------------------------------------------------------------------------------------------------------------------------------------------------------------------------------------------------------------------------------------------------------------------------------------------|
| Journal:                      | <i>BMJ Paediatrics Open</i>                                                                                                                                                                                                                                                                                                                                                                                                                                                                                                                                                                                                                                                                                                                                                                                                                                                                                                                                                                                      |
| Manuscript ID                 | bmjpo-2020-000808                                                                                                                                                                                                                                                                                                                                                                                                                                                                                                                                                                                                                                                                                                                                                                                                                                                                                                                                                                                                |
| Article Type:                 | Original research                                                                                                                                                                                                                                                                                                                                                                                                                                                                                                                                                                                                                                                                                                                                                                                                                                                                                                                                                                                                |
| Date Submitted by the Author: | 20-Jul-2020                                                                                                                                                                                                                                                                                                                                                                                                                                                                                                                                                                                                                                                                                                                                                                                                                                                                                                                                                                                                      |
| Complete List of Authors:     | <p>Oulasvirta, Jelena; Helsinki University Central Hospital, Division of Anaesthesiology; Department of Anaesthesiology, Intensive Care and Pain Medicine; University of Helsinki Hospital, Department of Emergency Medicine and Services</p> <p>Pirneskoski, Jussi; Helsinki University Central Hospital, Department of Emergency Medicine and Services</p> <p>Harve-Rytsälä, Heini; Helsinki University Central Hospital, Department of Emergency Medicine and Services</p> <p>Lääperi, Mitja; Helsinki University Central Hospital, Department of Emergency Medicine and Services</p> <p>Kuitunen, Mikael; Helsinki University Central Hospital, New Children's Hospital</p> <p>Kuisma, Markku; Helsinki University Central Hospital, Department of Emergency Medicine and Services</p> <p>Salmi, Heli; Helsinki University Central Hospital, Division of Anaesthesiology; Department of Anaesthesiology, Intensive Care and Pain Medicine; Helsinki University Central Hospital, New Children's Hospital</p> |
| Keywords:                     | Epidemiology, Health services research                                                                                                                                                                                                                                                                                                                                                                                                                                                                                                                                                                                                                                                                                                                                                                                                                                                                                                                                                                           |
|                               |                                                                                                                                                                                                                                                                                                                                                                                                                                                                                                                                                                                                                                                                                                                                                                                                                                                                                                                                                                                                                  |

SCHOLARONE™  
Manuscripts

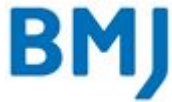

I, the Submitting Author has the right to grant and does grant on behalf of all authors of the Work (as defined in the below author licence), an exclusive licence and/or a non-exclusive licence for contributions from authors who are: i) UK Crown employees; ii) where BMJ has agreed a CC-BY licence shall apply, and/or iii) in accordance with the terms applicable for US Federal Government officers or employees acting as part of their official duties; on a worldwide, perpetual, irrevocable, royalty-free basis to BMJ Publishing Group Ltd ("BMJ") its licensees and where the relevant Journal is co-owned by BMJ to the co-owners of the Journal, to publish the Work in this journal and any other BMJ products and to exploit all rights, as set out in our [licence](#).

The Submitting Author accepts and understands that any supply made under these terms is made by BMJ to the Submitting Author unless you are acting as an employee on behalf of your employer or a postgraduate student of an affiliated institution which is paying any applicable article publishing charge ("APC") for Open Access articles. Where the Submitting Author wishes to make the Work available on an Open Access basis (and intends to pay the relevant APC), the terms of reuse of such Open Access shall be governed by a Creative Commons licence – details of these licences and which [Creative Commons](#) licence will apply to this Work are set out in our licence referred to above.

Other than as permitted in any relevant BMJ Author's Self Archiving Policies, I confirm this Work has not been accepted for publication elsewhere, is not being considered for publication elsewhere and does not duplicate material already published. I confirm all authors consent to publication of this Work and authorise the granting of this licence.

1  
2  
3  
4 1 Paediatric prehospital emergencies and restrictions during the  
5  
6  
7  
8 2 COVID-19 pandemic: a population-based study  
9  
10  
11  
12 3

13  
14  
15 4 Jelena Oulasvirta, MD<sup>1,2</sup>  
16

17  
18 5 Jussi Pirneskoski, MD<sup>2</sup>  
19

20  
21 6 Heini Harve-Rytsälä, MD, PhD<sup>2</sup>  
22

23  
24 7 Mitja Lääperi, MSc<sup>2</sup>  
25

26  
27 8 Mikael Kuitunen, MD, PhD<sup>3</sup>  
28

29  
30 9 Markku Kuisma, MD, PhD<sup>2</sup>  
31

32  
33 10 Heli Salmi, MD, PhD<sup>1,3</sup>  
34  
35  
36 11

37  
38 12 <sup>1</sup>Division of Anaesthesiology; Department of Anaesthesiology, Intensive Care and Pain Medicine; University  
39  
40 of Helsinki and Helsinki University Hospital, P.O. Box 340, FI-00029 HUS, Finland  
41  
42

43  
44 14 <sup>2</sup>Department of Emergency Medicine and Services, Helsinki University and Helsinki University Hospital, P.O.  
45  
46 15 Box 340, FI-00029 HUS, Finland  
47  
48

49 16 <sup>3</sup>New Children's Hospital, University of Helsinki and Helsinki University Hospital, P.O. Box 347, FI-00029  
50  
51 17 HUS, Finland  
52  
53

54 18  
55  
56

57 19 **Corresponding author:**  
58

59  
60 20 Jelena Oulasvirta

1  
2  
3  
4  
5  
6  
7  
8  
9  
10  
11  
12  
13  
14  
15  
16  
17  
18  
19  
20  
21  
22  
23  
24  
25  
26  
27  
28  
29  
30  
31  
32  
33  
34  
35  
36  
37  
38  
39  
40  
41  
42  
43  
44  
45  
46  
47  
48  
49  
50  
51  
52  
53  
54  
55  
56  
57  
58  
59  
60

1

2 **Postal address:** Töölö Hospital, University of Helsinki and Helsinki University Hospital, P.O. Box 266, FI-00029

3 HUS, Finland

4

5 **E-mail:** [jelena.oulasvirta@hus.fi](mailto:jelena.oulasvirta@hus.fi)

6 **Telephone:** +358 50 428 7622

7

8 **Keywords:** emergency medical services, paediatrics, outcome, patient safety, emergency care, COVID-19

9

10 **Word count:** Abstract 248, main text about 2464

Confidential: For Review Only

1  
2  
3 1 **What is already known on this topic**  
4  
5

- 6 2 • Compared to adults, children are less affected by the COVID-19 infection but may be affected by its  
7  
8 3 control measures.  
9  
10 4 • Children may experience collateral damage because of the infection control measures, mainly  
11  
12 5 designed to protect adults.  
13  
14 6 • The pandemic has decreased paediatric emergency department (ED) visits, but it is not clear how or  
15  
16 7 if prehospital care has also been affected.  
17  
18  
19

20 8 **What this study adds**  
21  
22

- 23 9 • The use of prehospital emergency medical services decreased in children after declaration of the  
24  
25 10 state of emergency in Finland.  
26  
27 11 • During the pandemic, ambulance calls for children were more often in the most urgent category  
28  
29 12 and due to trauma. Paradoxically, almost 60% of children were not transported to the ED.  
30  
31 13 • Societal measures targeted to protect adults against the pandemic affected children and their  
32  
33 14 emergency medical care.  
34  
35  
36  
37  
38  
39  
40  
41  
42  
43  
44  
45  
46  
47  
48  
49  
50  
51  
52  
53  
54  
55  
56  
57  
58  
59  
60

1  
2  
3 1 **ABSTRACT**  
4

5  
6 2 **Background**  
7

8  
9 3 Children are less vulnerable to serious forms of the COVID-19 disease. However, concerns have been raised  
10  
11 4 about children being the second victims of the pandemic and its control measures. Therefore, we wanted  
12  
13 5 to study if and how Finnish governmental restrictions aimed to constrain the local pandemic projected to  
14  
15 6 paediatric prehospital emergency medical services (EMS) contacts.  
16

17  
18 7 **Methods**  
19

20  
21 8 We conducted a population-based cohort study concerning all children aged 0-15 years with EMS contacts  
22  
23 9 in the Helsinki University Hospital (HUU) area during 1.3.-31.5.2020 (study period) and equivalent periods  
24  
25 10 in 2017-2019 (control periods). We analysed the demographic characteristics, time of EMS contact, reason  
26  
27 11 for EMS contact, priority of the dispatch, reason for transportation, priority of transportation, if any  
28  
29 12 consultations were made, any medication or oxygen or fluids given, if intubation was performed, and  
30  
31 13 whether paramedics took precautions when COVID-19 infection was suspected.  
32  
33

34  
35 14 **Results**  
36

37  
38 15 The number of paediatric EMS contacts decreased by 30.4% from mean of 1794 contacts to 1369 (p=0.003).  
39  
40 16 Patients were younger and there were proportionally less national language speakers: 5.3 years compared  
41  
42 17 to 6.3 years (p<0.001) and -7.8% (p=0.003), respectively. The EMS contacts were more often due to trauma,  
43  
44 18 (+23.7%, p<0.05), dispatched in the most urgent category (+139.9%, p=0.001), but less often resulted in  
45  
46 19 ambulance transport (-21.1%, p<0.001). There were 4 deaths during the study period compared to 0-2  
47  
48 20 during the control periods.  
49

50  
51  
52 21 **Conclusions**  
53

54  
55 22 In addition to a decrease in paediatric EMS contacts, the characteristics of the contacts changed  
56  
57 23 substantially during the restrictions placed because of the pandemic.  
58  
59  
60

## 1 INTRODUCTION

2 Children seem to be less vulnerable to the serious forms of the COVID-19 disease by the new pandemic  
3 coronavirus SARS-CoV-2 than adults (1–3). Still, following the infection control measures and associated  
4 abrupt changes in healthcare delivery, children have not been spared from the health effects of the  
5 pandemic. Consequently, health professionals have expressed concern over children becoming second  
6 victims of the pandemic (4–6).

7 Instructions on social distancing and self-quarantine resulted in a considerable decrease in paediatric  
8 emergency department (ED) visits (4,5). Also, the emergency healthcare itself changed: In EDs and  
9 prehospital emergency medical services (EMS), infection control measures, including the use of personal  
10 protective equipment have slowed patient flows and resulted in modified treatment protocols. On the  
11 other hand, the ubiquitous presence of COVID-19 in news and media may have created a bias in clinicians,  
12 who may be prone to diagnostic errors, suspecting COVID-19 over more common conditions.

13 Decreasing unnecessary paediatric ED visits and ambulance calls has been a priority in paediatric  
14 emergency care already before the pandemic (7–9). Now that these contacts have substantially decreased,  
15 it is important to analyse whether this change has taken place at the cost of health risks for children.

16 After noticing a decrease in paediatric EMS responses in our EMS system, and alarmed by reports stating  
17 risks associated with decreases in paediatric ED visits (4,5), we wanted to study whether the decrease in  
18 paediatric EMS contacts and transports has led to patient safety hazards; and, thus, whether the public  
19 information and infection control measures targeted to children have been reasonable, and whether they  
20 would need to be adjusted in possible new waves of the COVID-19 pandemic.

21



## 1           2 3   1   **METHODS**

### 4 5   2   **Study area and population**

6  
7   3   The Helsinki University Hospital (HUH) area in Southern Finland has 1 263 000 inhabitants including 217 000  
8  
9   4   0-15-years-old children (2019) (10) and consists of both urban and suburban regions covering 1 216 km<sup>2</sup>.  
10  
11  
12   5   This study covers all prehospital ambulance responses for children (aged 0-15 years) in the HUH area during  
13  
14   6   the study and control periods.  
15

### 16 17 18   8   **Organisation of emergency medical services and healthcare system**

19  
20  
21   9   Finland has a publicly financed universal healthcare system for all residents. The public healthcare  
22  
23   10   exclusively provides all prehospital emergency medical services. All emergency calls go to the governmental  
24  
25   11   emergency response centre (ERC). A professional ERC operator categorises the leading complaint to form  
26  
27   12   a dispatch code and determines a priority class from A (highest risk) to D (lowest risk) according to a formal  
28  
29   13   protocol (11). In HUH area, all prehospital emergencies are responded to by HUH EMS consisting of 36  
30  
31   14   ambulances and three medical supervisor units staffed by emergency medical technicians, paramedics and  
32  
33   15   two physician-staffed units. An emergency physician can be consulted by phone, or, requested on scene.  
34  
35   16   Not all patients encountered by EMS are transported to hospital by ambulance. After examination and  
36  
37   17   treatment, the EMS personnel may conclude that patient does not need ambulance transport. In that case  
38  
39   18   they must inform the patient or the caregivers on how to observe and treat the condition and on whether  
40  
41   19   or when to contact healthcare services again.  
42  
43

44  
45   20   There are two 24/7 paediatric ED units with in-patient care in the area. In addition, smaller units offer  
46  
47   21   primary level healthcare during office hours.  
48  
49

### 50   22 51 52   23   **Data collection**

53  
54   24   We retrieved all emergency responses concerning children (age 0-15 y) from the ambulance electronic  
55  
56   25   patient record system (Merlot Medi®, CGI Suomi Oy) in HUH area between 1.3.2020 and 31.5.2020 (study  
57  
58   26   period) and equivalent periods for three previous years: 1.3.2017 - 31.5.2017; 1.3.2018 - 31.5.2018;  
59  
60

1  
2  
3 1 1.3.2019 - 31.5.2019 (control periods). The study period covered the pandemic declaration by World Health  
4  
5 2 Organisation (WHO) on 11 March, the Finnish Government announcement of the state of emergency in  
6  
7 3 Finland on 16 March, and the reopening of schools on 14 May. We analysed the time of contact, reason for  
8  
9  
10 4 contact, dispatch priority, reason for transportation, priority of transportation, age, sex, native language,  
11  
12 5 whether the patient received medications, oxygen, fluids or was intubated, whether a physician was  
13  
14 6 consulted, and whether COVID-19 was suspected. We registered mortality within 72h and eventual  
15  
16 7 laboratory diagnostics for respiratory viruses (including SARS-CoV-2) from the Helsinki University Hospital  
17  
18 8 in-hospital patient record system (Uranus®, CGI Suomi Oy and Apotti®, Epic Systems Corporation).  
19  
20  
21 9  
22

### 23 10 **Statistical analysis**

24  
25 11 Estimates and proportions are shown using medians and interquartile ranges (IQR) and number of events  
26  
27 12 are shown using counts and percentages. To compare the change in EMS contacts during the study period  
28  
29 13 to that of control periods, we used the Mann-Whitney U test or Wilcoxon signed-rank test depending on  
30  
31 14 whether comparisons were made between all the observations or between the weeks of 2020 and the  
32  
33 15 previous years. The analyses were performed using R 3.6.3 (12) and the visualisations using ggplot2-  
34  
35 16 package (13). We used 0.05 as the level of significance. As the infection control measures changed during  
36  
37 17 the study period, we used line plots with date as the X-axis to evaluate the eventual changes in our  
38  
39 18 parameters.  
40  
41  
42  
43 19  
44

### 45 20 **Ethical aspects and Patient and Public Involvement statement**

46  
47 21 This is a register-based study approved by the Institutional Review Board of Helsinki University Hospital  
48  
49 22 (§24/2020). No public involvement was planned for this study, as the COVID-19 pandemic advanced  
50  
51 23 rapidly.  
52  
53  
54 24  
55  
56  
57  
58  
59  
60

## 1 RESULTS

2 There were 28 680 prehospital EMS contacts during the study period, of which 1368 (4.8%) concerned  
 3 children. This comprised a reduction of paediatric EMS contacts by 30.4% ( $p=0.003$ ) compared to the mean  
 4 of 1794 contacts in control periods (Table 1, Figure 1). Patients were younger and there were  
 5 proportionally less children speaking one of the national languages (Finnish or Swedish) as native language:  
 6 5.3 years compared to 6.3 years ( $p<0.001$ ) and -7.8% ( $p=0.003$ ), respectively (Table 1, Figures 1 and 2). The  
 7 demographic characteristics of children are described in Table 1 and Figure 1. (Table 1 and Figures 1 and 2  
 8 here)

10 **Table 1.** Descriptive statistics.

|                                      |                         | Mean 2017-2019        | 2020                  | change                   | P-value |
|--------------------------------------|-------------------------|-----------------------|-----------------------|--------------------------|---------|
| Age (years)                          |                         | 6.3 (2.1 - 12.7)      | 5.3 (1.8 - 12.0)      |                          | <0,001  |
| Sex (male)                           | all n (%)               | 965.3 (54.0%)         | 753 (55.1%)           |                          |         |
|                                      | n per week median (IQR) | 74.0 (67.7 - 77.7)    | 53.0 (48.0 - 70.0)    | -27.6% (-35.4% - -5.4%)  | 0,001   |
|                                      | % per week median (IQR) | 54.5% (51.5% - 55.5%) | 54.3% (52.7% - 56.2%) | 1.6% (-3.5 - 4.8%)       | 0,635   |
| Native language (Finnish or Swedish) | all n (%)               | 1338.0 (79.5%)        | 991 (74.7%)           |                          |         |
|                                      | n per week median (IQR) | 103.3 (99.0 - 105.0)  | 69.0 (66.0 - 91.0)    | -32.3% (-35.2% - -10.5%) | 0,002   |
|                                      | % per week median (IQR) | 79.5% (78.2% - 81.8%) | 72.8% (71.8% - 78.4%) | -7.8% (-8.5 - -4.8%)     | 0,003   |

11 IQR = Interquartile Range

13 The changes in the characteristics of EMS dispatch and transportation codes are described in Table 2 and  
 14 visualised in Figure 3. The proportion of the highest priority A dispatch code rose by 139.9% ( $p=0.001$ ). The  
 15 absolute number of trauma patients decreased by 11.9% ( $p<0.02$ ). However, their proportion increased by  
 16 23.7% ( $p<0.05$ ). The proportion of non-transported patients increased by 21.1% ( $p<0.001$ ). (Table 2 and  
 17 Figure 3 here)

18 Four patients were dead on arrival of the EMS or died on-scene during the study period, compared to 0 - 2  
 19 during the control periods (Table 3). (Table 3 here)

21 **Table 3.** Mortality presented by year during equivalent periods of 1.3.-31.5.

|  | 2017 | 2018 | 2019 | 2020 | P-value |
|--|------|------|------|------|---------|
|  |      |      |      |      |         |

|                                 |      |      |      |      |       |
|---------------------------------|------|------|------|------|-------|
| All paediatric EMS contacts (n) | 1722 | 1801 | 1857 | 1364 |       |
| Dead on arrival or on-scene (n) | 2    |      | 1    | 4    | 0,060 |

1 EMS = Emergency Medical Services

2

3 Less treatments were performed in 2020 compared to the control periods: establishing an intravenous

4 access decreased in proportion by 32.5% ( $p=0.008$ ) and administering medications by 35.3% ( $p<0.02$ ) (Table

5 4). (Table 4 here)

6 Of the 1368 children, COVID-19 infection was suspected in 103 (Figure4). Of these, 4 were previously

7 known to be positive for SARS-CoV-2 and there were 2 new infections. However, 41 of the 1261 children

8 not suspected as having COVID-19 by the EMS were tested for COVID-19 infection at the ED, with only 1

9 positive result. (Figure 4 here)

## 1 DISCUSSION

2  
3  
4  
5 2 During a local epidemic peak of the COVID-19 pandemic, prehospital emergency care delivered to children  
6  
7 3 decreased and its characteristics changed markedly. Even though emergency calls for children were more  
8  
9  
10 4 often categorised urgent, they lead more likely to not transporting the child to hospital. Concomitantly,  
11  
12 5 prehospital paediatric deaths increased. Consequently, the pandemic had unanticipated secondary effects  
13  
14 6 on the emergency healthcare of children.  
15  
16  
17 7

18  
19  
20 8 Finland has not experienced high COVID-19 infection rates in the population so far. The highest demand for  
21  
22 9 hospital beds and intensive care was experienced mid-April (14). Thus, the changes we noticed in the  
23  
24 10 emergency healthcare to children were neither due to SARS CoV-2, nor to an overwhelming of the  
25  
26 11 emergency healthcare system. Instead, they represent the changes in healthcare functionality, and in the  
27  
28 12 behaviour of families with children.  
29  
30  
31  
32 13

33  
34  
35 14 We expected the decrease in the number of EMS contacts for children based on international reports about  
36  
37 15 substantial decreases in the number of paediatric ED visits during the pandemic (15,16). Our figures were  
38  
39 16 also congruent with those from the paediatric EDs in the area, which saw a 45% decrease in the number of  
40  
41 17 visits after the beginning of the infection control measures, according to the hospital statistical data. The  
42  
43 18 EMS contacts with children started to decrease immediately after the declaration of state of emergency,  
44  
45 19 suggesting that the decrease was more societal than medical in nature.  
46  
47  
48  
49 20

50  
51  
52 21 Successful public guidance during the state of emergency, eliminating “unnecessary” EMS contacts (9,17)  
53  
54 22 may partly explain the sudden decrease in EMS contacts. In addition, infection control measures could have  
55  
56 23 decreased the occurrence of acute infections in children and, hence, the occurrence of febrile seizures and  
57  
58 24 dyspnoea, which are leading causes for paediatric EMS calls under normal circumstances (18). Still,  
59  
60

1  
2  
3 1 especially the peak in the number of children who died on-scene warrants careful examination of the EMS  
4  
5 2 contacts during the pandemic. Even if the increase in deaths may be due to coincidence, we cannot  
6  
7 3 confidently state that the decrease in EMS contacts was a positive proceeding.  
8  
9  
10  
11 4

12  
13 5 Our results suggest that paediatric low-acuity EMS contacts decreased more than contacts due to urgent or  
14  
15 6 critical reasons. While the EMS contacts fell by 30.4% as compared to previous years, the proportion of  
16  
17 7 dispatch with highest priority class increased, and the proportion of least urgent dispatches decreased. In  
18  
19 8 addition, the proportion of non-urgent transportation and the proportion of non-transported patients  
20  
21 9 increased. These are reassuring findings, as they implicate that the decrease in EMS calls did not result from  
22  
23 10 caregivers not daring to contact medical care providers even when urgently in need, or from severe  
24  
25 11 dysfunction of the healthcare system during the pandemic. A recent report from adult EMS contacts in the  
26  
27 12 UK supports this view, stating that the pandemic did not cause reluctance to call an ambulance in case of a  
28  
29 13 stroke or heart attack (19).  
30  
31  
32  
33  
34 14

35  
36  
37 15 The increase in the proportion of EMS calls in which the patient was not transported in an ambulance  
38  
39 16 (“non-transport”) is interesting, as in our system, the baseline rates for non-transportation were already  
40  
41 17 high (18,20). This finding is also paradoxical considering that non-urgent or non-medical complaints did not  
42  
43 18 seem overexpressed during the pandemic, as previously discussed. The increased tendency not to transport  
44  
45 19 by ambulance may reflect the practical difficulties imposed by the infection control measures during the  
46  
47 20 pandemic, such as a time-consuming obligation to thoroughly clean the ambulance after any transport. In  
48  
49 21 addition, prepared for the challenges of the pandemic, EMS personnel may have felt a need to ascertain  
50  
51 22 that a maximal number of units are available at all times.  
52  
53  
54  
55  
56 23  
57  
58  
59  
60

1  
2  
3  
4  
5  
6  
7  
8  
9  
10  
11  
12  
13  
14  
15  
16  
17  
18  
19  
20  
21  
22  
23  
24  
25  
26  
27  
28  
29  
30  
31  
32  
33  
34  
35  
36  
37  
38  
39  
40  
41  
42  
43  
44  
45  
46  
47  
48  
49  
50  
51  
52  
53  
54  
55  
56  
57  
58  
59  
60

1 We observed a decrease in the absolute rate of traumas, but non-traumatic emergencies decreased even  
2 more. This is interesting, as we hypothesised that the decrease in EMS dispatches during the pandemic  
3 would have been most pronounced for traumas. After all, due to social distancing, children had less school  
4 and sport activities and transports in motor vehicles. Under normal circumstances, these factors are major  
5 contributors for paediatric traumas (21). On the other hand, even if schools and activities were closed,  
6 playgrounds and other public outdoor areas remained open; thus, offering more unsupervised outside  
7 playing time. These changes from normal routines may have contributed to unpredicted new risks for  
8 traumas in children.

9  
10 We found that the number of EMS calls for children speaking other language than the national languages  
11 (Finnish or Swedish) decreased similarly to other contacts but with a delay (Figure 2). In Finland, native  
12 language can be used as a proxy for recent immigrant background. Interestingly, several reports have  
13 addressed the vulnerability of ethnic minority groups to COVID-19 (22,23). Our results suggest that  
14 language and immigrant background may play a role: the information took more time to reach  
15 subpopulations with deficiencies in language skills and poor knowledge of the healthcare system.  
16 Consequently, in possible new pandemic waves, more attention should be paid to efficiently spreading  
17 accurate information in different languages and formats.

18  
19 To evaluate if changes were specifically encountered by families with children, we also compared our  
20 findings to those in the total HUH population. In our area, EMS calls for adults also decreased by 11.1 % ( $p =$   
21 0.004) during the pandemic; but, in contrast to children, the absolute number of their most urgent contacts  
22 also decreased by 17.1 % ( $p = 0.004$ ), and there was no increase in the on-scene mortality. In addition, the  
23 decrease in adult EMS contacts occurred already before the declaration of the state of emergency. The  
24 pattern for children is clearly different, which strengthens the concern raised by recent reports suggesting  
25 that children may have had to bear the burden of the restrictions of the COVID-19 pandemic differently to

1  
2  
3 1 adults – even to the extent of becoming the “collateral damage” of the pandemic (6). Taken together, these  
4  
5 2 findings suggest that in adults, behavioural changes (i.e., decrease in risk behaviours following social  
6  
7 3 distancing, reluctance to contact medical care etc.) were responsible for most of the decrease in EMS  
8  
9 4 contacts; and that, in contrast to children, the protective measures were truly protective for adults,  
10  
11 5 decreasing the occurrence of severe acute illnesses and injuries. It remains to be solved how, in future  
12  
13 6 pandemics, children could be protected from the negative impacts of measures designed to protect adults.  
14  
15  
16  
17 7

18  
19  
20 8 To protect the EMS and ED personnel from infections, and to optimise the use of critical resources, it would  
21  
22 9 be crucial to be able to recognise children with probable or possible COVID-19. We found that calibration  
23  
24 10 still needs to be done – in about half of the patients where EMS personnel suspected COVID-19, no COVID-  
25  
26 11 19 tests were performed at the ED. On the other hand, only 41 of the 1261 patients in whom EMS  
27  
28 12 personnel did not suspect COVID-19 infections, were tested for COVID-19 with one positive result. This  
29  
30 13 implies that more explicit instructions for EMS personnel are needed (24).  
31  
32  
33  
34 14

35  
36  
37 15 Our study has several limitations. First, it is a single-centre study. Second, because of the rapid advance of  
38  
39 16 the COVID-19 pandemic, this study is retrospective. We tried to address the lack of historic references by  
40  
41 17 comparing the data to equivalent periods of three previous years. Finally, mortality is such a rare event that  
42  
43 18 no statistical conclusions can be drawn based on our data. However, we believe that this finding needs to  
44  
45 19 be disclosed.  
46  
47  
48  
49 20

50  
51  
52 21 The pandemic created exceptional circumstances with rapid changes in the behaviour of families with  
53  
54 22 children and the functionality of emergency healthcare. During recent pandemics, e.g. the H1N1 influenza  
55  
56 23 in 2009, school closure and social distancing measures were never extended to children in a similar way  
57  
58 24 (25). In our area, the setting was particularly interesting, as the prevalence of COVID-19 in the population  
59  
60



1  
2  
3  
4  
5  
6  
7  
8  
9  
10  
11  
12  
13  
14  
15  
16  
17  
18  
19  
20  
21  
22  
23  
24  
25  
26  
27  
28  
29  
30  
31  
32  
33  
34  
35  
36  
37  
38  
39  
40  
41  
42  
43  
44  
45  
46  
47  
48  
49  
50  
51  
52  
53  
54  
55  
56  
57  
58  
59  
60

1 remained low throughout the epidemic (14). Thus, our results may be generalisable to other similar  
2 situations of unexpected quick changes in the healthcare.

3

4 **CONCLUSIONS**

5 The total number of contacts decreased rapidly during the COVID-19. Also, the children encountered by the  
6 EMS were more ill and we registered more deaths than in control periods. Our results highlight the need to  
7 consider secondary effects of healthcare interventions also on other populations than those originally  
8 targeted.

9

Confidential: For Review Only

1  
2  
3 1 **A funding statement:**  
4

5  
6 2 This study received a grant from The Finnish Medical Society Duodecim. The Society had no role in the  
7  
8 3 study design, collection, analysis or interpretation of data; in the writing of the manuscript, or in the  
9  
10 4 decision to submit the manuscript for publication.  
11

12  
13 5  
14  
15 6 **A competing interests statement:**  
16

17 7 Authors do not have competing interests.  
18  
19 8

20  
21  
22 9 **Contributions:**  
23

24 10 JO, HS, MaK, HHR conceptualised and designed the study, carried out the initial analyses, drafted the initial  
25  
26 11 manuscript, and reviewed and revised the manuscript. JO, HS, HHR and JP collected the data. JP and MiK  
27  
28 12 participated in the design of the study, reviewed the initial data collection and initial analyses, and critically  
29  
30 13 reviewed and revised the manuscript. ML designed the data analysis instruments, coordinated and  
31  
32 14 supervised data analysis, and critically reviewed the manuscript. All authors approved the final manuscript  
33  
34 15 as submitted and agreed to be accountable for all aspects of the work.  
35  
36 16

37  
38  
39 17 **Any checklist and flow diagram for the appropriate reporting statement,**  
40

41 18 STROBE, please see Supplementary Materials.  
42  
43 19

44  
45  
46 20 **Patient consent form:**  
47

48 21 Not applicable.  
49  
50 22

51  
52  
53 23 **Data availability statement:**  
54

55 24 Data are available upon reasonable request.  
56  
57 25  
58  
59 26  
60

1  
2  
3 **1 FIGURE LEGENDS:**  
4

5 **2 Figure 1:** Basic information on paediatric EMS contacts in 2020 compared to equivalent periods in 2017-  
6  
7 2019.  
8

9  
10 4 a) Number of weekly EMS contacts  
11

12 5 b) A timeline of the course of the first pandemic wave and number of weekly EMS contacts.  
13

14 6 1. World Health Organization declared the pandemic, 11 March 2020  
15

16 7 2. Public social gatherings were limited to a maximum of 500 participants, 15 March2020  
17

18 8 3. The government announced the state of emergency, 16 March.2020  
19

20  
21 9 4. National restrictions and social distancing launched. Schools closed, 18 March2020  
22

23 10 5. Launching strict national border control, 19 March 2020  
24

25 11 6. Isolation of Southern Finland started, 28, March 2020  
26

27 12 7. Isolation of Southern Finland ended, 15 April 2020  
28

29 13 8. Schools reopened, 14 May 2020  
30

31  
32 14 c) Number and proportion of children according to age groups  
33

34 15 d) The proportion of EMS contacts according to time of day  
35

36 16 EMS = Emergency Medical Services  
37  
38

39 17  
40  
41 18 **Figure 2:** Proportions of EMS contacts with native language Finnish or Swedish compared to other-  
42  
43 language-speakers  
44

45 20 a) Presented by year during equivalent periods of 1 March to 31 May.  
46

47  
48 21 b) A timeline of the course of the first pandemic wave and proportion of EMS contacts with other-  
49  
50 language-speakers.  
51

52 23 1. World Health Organization declared pandemic, 11 March 2020  
53

54 24 2. Public social gatherings were limited to a maximum of 500 participants, 15 March2020  
55

56  
57 25 3. The government announced the state of emergency, 16 March.2020  
58

59 26 4. National restrictions and social distancing launched. Schools closed, 18 March2020  
60

- 1
- 2
- 3 1 5. Launching strict national border control, 19 March 2020
- 4
- 5 2 6. Isolation of Southern Finland started, 28, March 2020
- 6
- 7 3 7. Isolation of Southern Finland ended, 15 April 2020
- 8
- 9
- 10 4 8. Schools reopened, 14 May 2020
- 11

12 5 EMS = Emergency Medical Services

13

14 6

15

16 7 **Figure 3:** A timeline of the course of the first pandemic wave and

17

18

19 8 a) Number of trauma patients

20

21

22 9 b) Proportion of trauma patients

23

24

25 10 c) Proportion of non-transported patients

- 26
- 27
- 28 11 1. World Health Organization declared pandemic, 11 March 2020
- 29
- 30 12 2. Public social gatherings were limited to a maximum of 500 participants, 15 March 2020
- 31
- 32 13 3. The government announced the state of emergency, 16 March 2020
- 33
- 34 14 4. National restrictions and social distancing launched. Schools closed, 18 March 2020
- 35
- 36 15 5. Launching strict national border control, 19 March 2020
- 37
- 38 16 6. Isolation of Southern Finland started, 28, March 2020
- 39
- 40 17 7. Isolation of Southern Finland ended, 15 April 2020
- 41
- 42 18 8. Schools reopened, 14 May 2020
- 43
- 44
- 45

46

47 19 EMS = Emergency Medical Services

48

49 20

50

51 21 **Figure 4:** Flow-chart of EMS contacts in 2020 and possible suspicion of COVID-19 infection

52

53

54 22 EMS = Emergency Medical Services

55

56

57 23 ED = Emergency Department

58

59

60 24 resp infection = respiratory infection

1  
2  
3  
4  
5  
6  
7  
8  
9  
10  
11  
12  
13  
14  
15  
16  
17  
18  
19  
20  
21  
22  
23  
24  
25  
26  
27  
28  
29  
30  
31  
32  
33  
34  
35  
36  
37  
38  
39  
40  
41  
42  
43  
44  
45  
46  
47  
48  
49  
50  
51  
52  
53  
54  
55  
56  
57  
58  
59  
60

1

2 **ORCID ID**

3 Jelena Oulasvirta <https://orcid.org/0000-0001-6750-4615>

4

Confidential: For Review Only

1  
2  
3 **1 REFERENCES:**  
4  
5

- 6 2 1. Lu X, Zhang L, Du H, Zhang J, Li YY, Qu J, et al. SARS-CoV-2 Infection in Children. *N Engl J Med*. 2020  
7  
8 3 Apr 23;382(17):1663–5.
- 10 4 2. Castagnoli R, Votto M, Licari A, Brambilla I, Bruno R, Perlini S, et al. Severe Acute Respiratory  
11  
12  
13 5 Syndrome Coronavirus 2 (SARS-CoV-2) Infection in Children and Adolescents. *JAMA Pediatr*. 2020  
14  
15 6 Apr 22;
- 17 7 3. Parri N, Lenge M, Buonsenso D. Children with Covid-19 in Pediatric Emergency Departments in Italy.  
18  
19  
20 8 *N Engl J Med*. 2020 May 1;NEJMc2007617.
- 22 9 4. Lazzerini M, Barbi E, Apicella A, Marchetti F, Cardinale F, Trobia G. Delayed access or provision of  
23  
24  
25 10 care in Italy resulting from fear of COVID-19. *Lancet Child Adolesc Heal*. 2020 May 1;4(5):e10–1.
- 26  
27  
28 11 5. Green P. Risks to children and young people during covid-19 pandemic. *BMJ*. 2020 Apr  
29  
30  
31 12 28;369:m1669.
- 32  
33  
34 13 6. Crawley E, Loades M, Feder G, Logan S, Redwood S, Macleod J. Wider collateral damage to children  
35  
36 14 in the UK because of the social distancing measures designed to reduce the impact of COVID-19 in  
37  
38 15 adults. *BMJ Paediatr Open*. 2020 May 4;4(1):e000701.
- 39  
40  
41 16 7. Poku BA, Hemingway P. Reducing repeat paediatric emergency department attendance for non-  
42  
43  
44 17 urgent care: a systematic review of the effectiveness of interventions. *Emerg Med J*. 2019 Jun  
45  
46 18 21;36(7):emermed-2018-207536.
- 47  
48  
49 19 8. Pearson C, Kim DS, Mika VH, Imran Ayaz S, Millis SR, Dunne R, et al. Emergency department visits in  
50  
51 20 patients with low acuity conditions: Factors associated with resource utilization. *Am J Emerg Med*.  
52  
53 21 2018 Aug 13;36(8):1327–31.
- 54  
55  
56 22 9. Farion KJ, Wright M, Zemek R, Neto G, Karwowska A, Tse S, et al. Understanding Low-Acuity Visits to  
57  
58 23 the Pediatric Emergency Department. Ecker T, editor. *PLoS One*. 2015 Jun 17;10(6):e0128927.
- 59  
60

- 1  
2  
3 1 10. Finnish Official Statistics - Suomen virallinen tilasto (SVT): Väestörakenne [web page]. ISSN=1797-  
4  
5 2 5379. Helsinki: Tilastokeskus [accessed: 16.6.2020]. <http://www.stat.fi/til/vaerak/index.html>. 2019.  
6  
7  
8 3 11. Hoikka M, Länkimäki S, Silfvast T, Ala-Kokko TI. Medical priority dispatch codes—comparison with  
9  
10 4 National Early Warning Score. *Scand J Trauma Resusc Emerg Med*. 2016 Dec 3;24(1):142.  
11  
12  
13 5 12. R Core Team (2020). R: A language and environment for statistical computing. R Foundation for  
14  
15 6 Statistical Computing, Vienna, Austria. 2020.  
16  
17  
18 7 13. Wickham H. *ggplot2: Elegant Graphics for Data Analysis*. Cham: Springer International Publishing;  
19  
20 8 2016. (Use R!).  
21  
22  
23 9 14. Situation update on coronavirus - Infectious diseases and vaccinations - Finnish Institute for Health  
24  
25 10 and Welfare [Internet]. [cited 2020 Jul 12]. Available from: [https://thl.fi/en/web/infectious-diseases-](https://thl.fi/en/web/infectious-diseases-and-vaccinations/what-s-new/coronavirus-covid-19-latest-updates/situation-update-on-coronavirus)  
26  
27 11 [and-vaccinations/what-s-new/coronavirus-covid-19-latest-updates/situation-update-on-coronavirus](https://thl.fi/en/web/infectious-diseases-and-vaccinations/what-s-new/coronavirus-covid-19-latest-updates/situation-update-on-coronavirus)  
28  
29  
30  
31 12 15. Scaramuzza A, Tagliaferri F, Bonetti L, Soliani M, Morotti F, Bellone S, et al. Changing admission  
32  
33 13 patterns in paediatric emergency departments during the COVID-19 pandemic. *Arch Dis Child*. 2020  
34  
35 14 Jul;105(7):704.2-706.  
36  
37  
38 15 16. Isba R, Edge R, Jenner R, Broughton E, Francis N, Butler J. Where have all the children gone?  
39  
40 16 Decreases in paediatric emergency department attendances at the start of the COVID-19 pandemic  
41  
42 17 of 2020. *Arch Dis Child*. 2020;105(7):2020.  
43  
44  
45 18 17. Morgan SR, Chang AM, Alqatari M, Pines JM. Non-Emergency Department Interventions to Reduce  
46  
47 19 ED Utilization: A Systematic Review. Zehtabchi S, editor. *Acad Emerg Med*. 2013 Oct;20(10):969–85.  
48  
49  
50  
51 20 18. Harve H, Salmi H, Rahiala E, Pohjalainen P, Kuisma M. Out-of-hospital paediatric emergencies: a  
52  
53 21 prospective, population-based study. *Acta Anaesthesiol Scand*. 2016 Mar;60(3):360–9.  
54  
55  
56 22 19. Holmes JL, Brake S, Docherty M, Lilford R, Watson S. Emergency ambulance services for heart attack  
57  
58 23 and stroke during UK's COVID-19 lockdown. *Lancet*. 2020 May;395(10237):e93–4.  
59  
60

- 1  
2  
3 1 20. Oulasvirta J, Salmi H, Kuisma M, Rahiala E, Lääperi M, Harve-Rytsälä H. Outcomes in children  
4  
5 2 evaluated but not transported by ambulance personnel: retrospective cohort study. *BMJ Paediatr*  
6  
7 3 *Open*. 2019 Oct 23;3(1):e000523.  
8  
9  
10 4 21. Listo I, Salmi H, Hästbacka M, Lääperi M, Oulasvirta J, Etelälahti T, et al. Pediatric traumas and  
11  
12 5 neighborhood socioeconomic characteristics: A population based study. *J Pediatr Surg*. 2020 Jun;  
13  
14  
15 6 22. Williamson EJ, Walker AJ, Bhaskaran K, Bacon S, Bates C, Morton CE, et al. OpenSAFELY: factors  
16  
17 7 associated with COVID-19 death in 17 million patients. *Nature*. 2020 Jul 8;  
18  
19  
20 8 23. Pan D, Sze S, Minhas JS, Bangash MN, Pareek N, Divall P, et al. The impact of ethnicity on clinical  
21  
22 9 outcomes in COVID-19: A systematic review. *EClinicalMedicine*. 2020 Jun;23:100404.  
23  
24  
25 10 24. Lemoine S, Chabernaud J-L, Travers S, Prunet B. COVID-19 in pediatric patients: What the  
26  
27 11 prehospital teams need to know. *Arch Pédiatrie*. 2020 Jul;27(5):281–2.  
28  
29  
30 12 25. Jhaveri R. Echoes of 2009 H1N1 Influenza Pandemic in the COVID Pandemic. *Clin Ther*. 2020  
31  
32 13 May;42(5):736–40.  
33  
34  
35  
36 14  
37  
38  
39  
40  
41  
42  
43  
44  
45  
46  
47  
48  
49  
50  
51  
52  
53  
54  
55  
56  
57  
58  
59  
60



1 **Table 2.** Change in the dispatch and transportation codes.

|                            |                         | Mean 2017-2019        | 2020                  | change                   | P-value          |
|----------------------------|-------------------------|-----------------------|-----------------------|--------------------------|------------------|
| All EMS contacts           | all n (%)               | 1794.3 (100.0%)       | 1368 (100.0%)         |                          |                  |
|                            | n per week median (IQR) | 137.7 (130.7 - 142.0) | 91.0 (86.0 - 132.0)   | -30.4% (-36.6% - -12.8%) | <b>0,003</b>     |
| Dispatch priority A*       | all n (%)               | 55.3 (3.1%)           | 90 (6.6%)             |                          |                  |
|                            | n per week median (IQR) | 3.7 (3.3 - 3.7)       | 8.0 (7.0 - 8.0)       | 90.9% (36.4% - 140.0%)   | <b>0,031</b>     |
|                            | % per week median (IQR) | 2.7% (2.4% - 2.8%)    | 6.1% (5.7% - 8.4%)    | 139.9% (116.7 - 175.9%)  | <b>0,001</b>     |
| Dispatch priority B*       | all n (%)               | 690.7 (38.5%)         | 478 (34.9%)           |                          |                  |
|                            | n per week median (IQR) | 51.7 (50.3 - 55.7)    | 37.0 (30.0 - 43.0)    | -29.0% (-42.3% - -20.7%) | <b>0,002</b>     |
|                            | % per week median (IQR) | 38.2% (36.7% - 40.5%) | 36.1% (31.5% - 38.1%) | -8.7% (-15.9 - -2.3%)    | <b>0,027</b>     |
| Dispatch priority C*       | all n (%)               | 932.7 (52.0%)         | 658 (48.1%)           |                          |                  |
|                            | n per week median (IQR) | 71.3 (67.3 - 74.0)    | 44.0 (43.0 - 57.0)    | -34.7% (-41.8% - -23.3%) | <b>0,001</b>     |
|                            | % per week median (IQR) | 52.1% (50.5% - 53.7%) | 49.4% (45.7% - 51.4%) | -6.7% (-9.1 - -4.1%)     | <b>0,048</b>     |
| Dispatch priority D*       | all n (%)               | 115.7 (6.4%)          | 143 (10.4%)           |                          |                  |
|                            | n per week median (IQR) | 8.3 (7.3 - 11.0)      | 10.0 (8.0 - 12.0)     | 12.5% (-11.8% - 60.0%)   | 0,235            |
|                            | % per week median (IQR) | 6.5% (5.2% - 7.9%)    | 9.5% (8.1% - 11.4%)   | 65.0% (38.9 - 83.6%)     | <b>0,001</b>     |
| Transported patients       | all n (%)               | 927.3 (51.7%)         | 578 (42.3%)           |                          |                  |
|                            | n per week median (IQR) | 73.0 (67.0 - 74.7)    | 36.0 (34.0 - 54.0)    | -49.1% (-52.0% - -27.7%) | <b>0,002</b>     |
|                            | % per week median (IQR) | 52.2% (51.4% - 52.9%) | 41.9% (39.1% - 44.8%) | -19.5% (-27.0 - -13.4%)  | <b>&lt;0,001</b> |
| Transportation priority A* | all n (%)               | 12.3 (0.7%)           | 6 (0.4%)              |                          |                  |
|                            | n per week median (IQR) | 1.0 (0.8 - 1.0)       | 1.0 (1.0 - 1.0)       | 50.0% (0.0% - 50.0%)     | 0,174            |
|                            | % per week median (IQR) | 0.7% (0.5% - 0.8%)    | 1.2% (0.9% - 1.2%)    | 107.2% (52.4 - 381.5%)   | <b>0,031</b>     |
| Transportation priority B* | all n (%)               | 92.3 (5.1%)           | 62 (4.5%)             |                          |                  |
|                            | n per week median (IQR) | 7.0 (5.3 - 8.0)       | 5.0 (3.0 - 5.0)       | -34.8% (-51.6% - -28.6%) | <b>0,004</b>     |
|                            | % per week median (IQR) | 5.4% (4.4% - 5.6%)    | 5.0% (3.5% - 5.7%)    | -15.0% (-31.8 - 4.0%)    | 0,168            |
| Transportation priority C* | all n (%)               | 602.0 (33.6%)         | 398 (29.2%)           |                          |                  |
|                            | n per week median (IQR) | 45.3 (43.0 - 48.3)    | 25.0 (22.0 - 41.0)    | -40.0% (-48.4% - -11.0%) | <b>&lt;0,001</b> |
|                            | % per week median (IQR) | 33.2% (31.9% - 34.5%) | 29.1% (25.6% - 31.2%) | -8.8% (-24.2 - -2.0%)    | <b>0,005</b>     |
| Transportation priority D* | all n (%)               | 220.3 (12.3%)         | 113 (8.3%)            |                          |                  |
|                            | n per week median (IQR) | 16.3 (15.0 - 18.0)    | 7.0 (6.0 - 9.0)       | -60.9% (-63.3% - -45.0%) | <b>0,002</b>     |
|                            | % per week median (IQR) | 11.8% (11.6% - 13.0%) | 7.4% (6.6% - 8.6%)    | -37.7% (-46.2 - -27.2%)  | <b>0,001</b>     |
| Trauma patients            | all n (%)               | 606.0 (33.8%)         | 504 (36.8%)           |                          |                  |
|                            | n per week median (IQR) | 45.3 (39.0 - 51.3)    | 36.0 (31.0 - 41.0)    | -11.9% (-24.5% - -9.6%)  | <b>0,011</b>     |
|                            | % per week median (IQR) | 32.7% (29.6% - 37.1%) | 39.0% (33.3% - 41.7%) | 23.7% (-7.1 - 28.1%)     | <b>0,048</b>     |
| Non-transported patients   | all n (%)               | 866.0 (48.3%)         | 786 (57.6%)           |                          |                  |
|                            | n per week median (IQR) | 66.3 (64.0 - 68.3)    | 56.0 (50.0 - 68.0)    | -7.8% (-26.8% - 0.0%)    | <b>0,108</b>     |
|                            | % per week median (IQR) | 47.8% (47.1% - 48.7%) | 58.1% (55.2% - 60.9%) | 21.1% (15.0 - 28.4%)     | <b>&lt;0,001</b> |

2 \* the priority class from A to D refers to the urgency of the dispatch /transportation and /or to the risk of  
3 the symptom to a patient – A being the contact with highest urgency and risk and D the lowest urgency and  
4 risk

5 EMS = Emergency Medical Services

6 IQR = Interquartile Range

7

1 **Table 4.** Change in the interventions performed on-scene

|                                        |                         | Mean 2017-2019        | 2020                  | change                   | P-value      |
|----------------------------------------|-------------------------|-----------------------|-----------------------|--------------------------|--------------|
| additional help requested              | all n (%)               | 86.7 (4.8%)           | 94 (6.9%)             |                          |              |
|                                        | n per week median (IQR) | 6.3 (5.3 - 7.7)       | 7.0 (5.0 - 9.0)       | 23.5% (-29.4% - 31.3%)   | 0,529        |
|                                        | % per week median (IQR) | 4.6% (4.0% - 5.6%)    | 6.8% (4.5% - 8.5%)    | 43.3% (0.7 - 117.7%)     | <b>0,040</b> |
| MICU on-scene                          | all n (%)               | 26.0 (1.4%)           | 24 (1.8%)             |                          |              |
|                                        | n per week median (IQR) | 1.7 (1.3 - 2.3)       | 2.0 (2.0 - 2.8)       | 0.0% (-13.2% - 50.0%)    | 0,435        |
|                                        | % per week median (IQR) | 1.3% (0.9% - 1.7%)    | 2.3% (1.4% - 2.5%)    | 46.3% (-1.4 - 100.5%)    | <b>0,049</b> |
| emergency physician consulted by phone | all n (%)               | 291.3 (16.2%)         | 236 (17.2%)           |                          |              |
|                                        | n per week median (IQR) | 21.7 (21.3 - 23.0)    | 18.0 (15.0 - 20.0)    | -28.4% (-36.3% - -1.7%)  | <b>0,023</b> |
|                                        | % per week median (IQR) | 16.1% (15.3% - 17.1%) | 17.6% (15.6% - 18.1%) | 2.7% (-4.6 - 19.6%)      | 0,588        |
| any measurements done on-scene         | all n (%)               | 1693.0 (94.4%)        | 1280 (93.5%)          |                          |              |
|                                        | n per week median (IQR) | 129.0 (124.0 - 134.3) | 88.0 (78.0 - 124.0)   | -29.0% (-37.6% - -12.3%) | <b>0,001</b> |
|                                        | % per week median (IQR) | 94.6% (94.0% - 94.9%) | 93.9% (91.9% - 95.3%) | -0.0% (-2.2 - 1.6%)      | 0,455        |
| intubation*                            | all n (%)               | 2.0 (0.1%)            | 3 (0.2%)              |                          |              |
|                                        | n per week median (IQR) | 0.3 (0.3 - 0.3)       | 1.5 (1.2 - 1.8)       |                          |              |
|                                        | % per week median (IQR) | 0.2% (0.1% - 0.2%)    | 1.3% (1.2% - 1.3%)    |                          |              |
| supplementary oxygen given             | all n (%)               | 41.7 (2.3%)           | 16 (1.2%)             |                          |              |
|                                        | n per week median (IQR) | 3.0 (2.3 - 3.7)       | 2.0 (1.0 - 2.2)       | -39.4% (-51.8% - 12.5%)  | 0,306        |
|                                        | % per week median (IQR) | 1.9% (1.7% - 2.5%)    | 1.5% (1.2% - 2.4%)    | -19.3% (-33.8 - 17.2%)   | 0,742        |
| intravenous connection established     | all n (%)               | 133.3 (7.4%)          | 65 (4.7%)             |                          |              |
|                                        | n per week median (IQR) | 10.7 (8.3 - 12.3)     | 5.0 (3.0 - 7.0)       | -52.6% (-70.7% - -30.8%) | <b>0,003</b> |
|                                        | % per week median (IQR) | 7.6% (5.9% - 9.0%)    | 4.4% (2.9% - 5.8%)    | -32.5% (-56.8 - -24.9%)  | <b>0,008</b> |
| any medication given                   | all n (%)               | 195.0 (10.9%)         | 111 (8.1%)            |                          |              |
|                                        | n per week median (IQR) | 14.3 (12.3 - 15.3)    | 7.0 (6.0 - 9.0)       | -44.7% (-63.6% - -37.9%) | <b>0,001</b> |
|                                        | % per week median (IQR) | 10.3% (8.9% - 11.9%)  | 7.6% (6.6% - 9.1%)    | -35.3% (-44.2 - -12.9%)  | <b>0,013</b> |
| medication given per os                | all n (%)               | 13.0 (0.7%)           | 13 (0.9%)             |                          |              |
|                                        | n per week median (IQR) | 1.0 (0.7 - 1.4)       | 2.0 (1.0 - 2.0)       | 100.0% (-20.0% - 200.0%) | 0,140        |
|                                        | % per week median (IQR) | 0.7% (0.5% - 1.1%)    | 1.4% (1.2% - 1.7%)    | 117.2% (19.4 - 220.2%)   | 0,109        |
| inhalation given                       | all n (%)               | 63.3 (3.5%)           | 18 (1.3%)             |                          |              |
|                                        | n per week median (IQR) | 4.0 (3.3 - 5.3)       | 1.0 (1.0 - 3.5)       | -75.0% (-80.6% - -11.4%) | 0,090        |
|                                        | % per week median (IQR) | 3.2% (2.5% - 4.0%)    | 1.2% (1.1% - 2.7%)    | -64.8% (-67.4 - 6.5%)    | 0,219        |
| invasive** medication given            | all n (%)               | 113.0 (6.3%)          | 84 (6.1%)             |                          |              |
|                                        | n per week median (IQR) | 8.7 (6.7 - 9.0)       | 6.0 (5.0 - 7.0)       | -33.3% (-48.3% - -8.7%)  | 0,050        |
|                                        | % per week median (IQR) | 6.5% (4.7% - 7.2%)    | 5.8% (4.9% - 7.5%)    | -22.7% (-25.8 - 31.3%)   | 0,635        |
| medication given per rectum            | all n (%)               | 10.3 (0.6%)           | 3 (0.2%)              |                          |              |
|                                        | n per week median (IQR) | 1.0 (0.7 - 1.3)       | 1.0 (1.0 - 1.0)       | -25.0% (-32.5% - 87.5%)  | 1,000        |
|                                        | % per week median (IQR) | 0.7% (0.5% - 1.1%)    | 1.1% (0.9% - 1.1%)    | 7.5% (-13.2 - 171.8%)    | 0,750        |
| temperature measured                   | all n (%)               | 1042.7 (58.1%)        | 851 (62.2%)           |                          |              |
|                                        | n per week median (IQR) | 80.7 (74.3 - 85.0)    | 56.0 (52.0 - 82.0)    | -28.2% (-33.5% - -15.2%) | <b>0,012</b> |
|                                        | % per week median (IQR) | 57.5% (56.3% - 61.4%) | 63.0% (60.5% - 63.7%) | 6.7% (3.4 - 11.8%)       | <b>0,027</b> |

2 \* not enough data for calculating difference in intubation rates

3 \*\* invasive means any intravenous or intranasal or intramuscular or intraosseal medication given

4 MICU = mobile intensive care unit

5

1  
2  
3  
4  
5  
6  
7  
8  
9  
10  
11  
12  
13  
14  
15  
16  
17  
18  
19  
20  
21  
22  
23  
24  
25  
26  
27  
28  
29  
30  
31  
32  
33  
34  
35  
36  
37  
38  
39  
40  
41  
42  
43  
44  
45  
46  
47  
48  
49  
50  
51  
52  
53  
54  
55  
56  
57  
58  
59  
60

1 **Supplementary Materials:**

- 2           1. STROBE
- 3           2. Statistics on EMS contacts

Confidential: For Review Only

1  
2  
3  
4  
5  
6  
7  
8  
9  
10  
11  
12  
13  
14  
15  
16  
17  
18  
19  
20  
21  
22  
23  
24  
25  
26  
27  
28  
29  
30  
31  
32  
33  
34  
35  
36  
37  
38  
39  
40  
41  
42  
43  
44  
45  
46  
47  
48  
49  
50  
51  
52  
53  
54  
55  
56  
57  
58  
59  
60

July 19th, 2020

Dear Editor,

Please find enclosed our manuscript entitled **“Paediatric prehospital emergencies and restrictions during the COVID-19 pandemic: a population-based study”** that we respectfully submit to *BMJ Paediatrics Open* as an original article.

Paediatricians have been concerned about the impact that infection control measures, mainly targeted to protect adults against the pandemic, could have on children. It may become difficult for acutely ill children to receive timely medical care due to social distancing measures, modified customary protocols and consequently altered patient flows in emergency departments. In order to prevent children becoming the second victims of the COVID-19 pandemic as the pandemic continues, it is crucial to study the problems that have occurred, and to adjust the infection control measures accordingly.

In a retrospective population-based approach in Helsinki, Finland, we describe the changes that occurred in paediatric prehospital emergency care from 1.3.2020 to 31.5.2020. The study period covers the pandemic declaration by World Health Organisation (WHO) on 11 March, the Finnish Government announcement of the state of emergency in Finland on 16 March, and the de-escalation of the infection control measures in mid-May. In order to better analyse the changes that happened during the pandemic and to account for possible annual variation, we compared the data to same periods in the three previous years. We noticed a significant decrease in the number of ambulance calls leading to contact with emergency medical services (EMS). However, the EMS contacts were more severe. In addition, more children died on-scene than during the same time in the control period. Only a small minority of children with infectious symptoms had COVID-19, and they were not particularly accurately identified in the prehospital setting.

Thus far, the COVID-19 pandemic has not reached high numbers of infections in Finland. Therefore, the changes we noticed in paediatric emergency medical care are not due to the coronavirus or to an overwhelming of the healthcare system. Instead, they only represent societal

1  
2 measures targeted at controlling the infection, leading to changes in the behaviour of families  
3 with children and in the healthcare offered to them.  
4

5  
6  
7 Our results could be used to adjust information and guidance aimed at families with children in  
8 the current and new waves of the pandemic. To protect children from negative consequences of  
9 social distancing and other emergency control measures, it is crucial to advise families with  
10 children to seek emergency medical care using established criteria, and not to hesitate calling an  
11 ambulance when needed. In addition, as it does not seem easy to recognise children with COVID-  
12 19, the disease should be suspected with a low threshold in prehospital care.  
13  
14  
15  
16  
17

18  
19 We hope that our manuscript would be of interest to the readers of the *BMJ Paediatrics Open* and  
20 look forward to your response.  
21  
22

23  
24 The data presented here have not been published previously and the manuscript is not under  
25 consideration elsewhere. All authors are responsible for the reported research, fulfil authorship  
26 requirements, and have approved the manuscript as submitted.  
27  
28

29  
30 Yours sincerely,  
31  
32

33  
34  
35 Jelena Oulasvirta  
36  
37

38  
39  
40 **Correspondence:**

41 Jelena Oulasvirta, M.D, MSc.

42 Töölö Hospital

43 University of Helsinki and Helsinki University Hospital

44 P.O.Box 266

45 FIN-00029 HUS

46 Finland

47 E-mail: [jelena.oulasvirta@hus.fi](mailto:jelena.oulasvirta@hus.fi)  
48  
49  
50  
51  
52  
53  
54  
55  
56  
57  
58  
59  
60

**a**

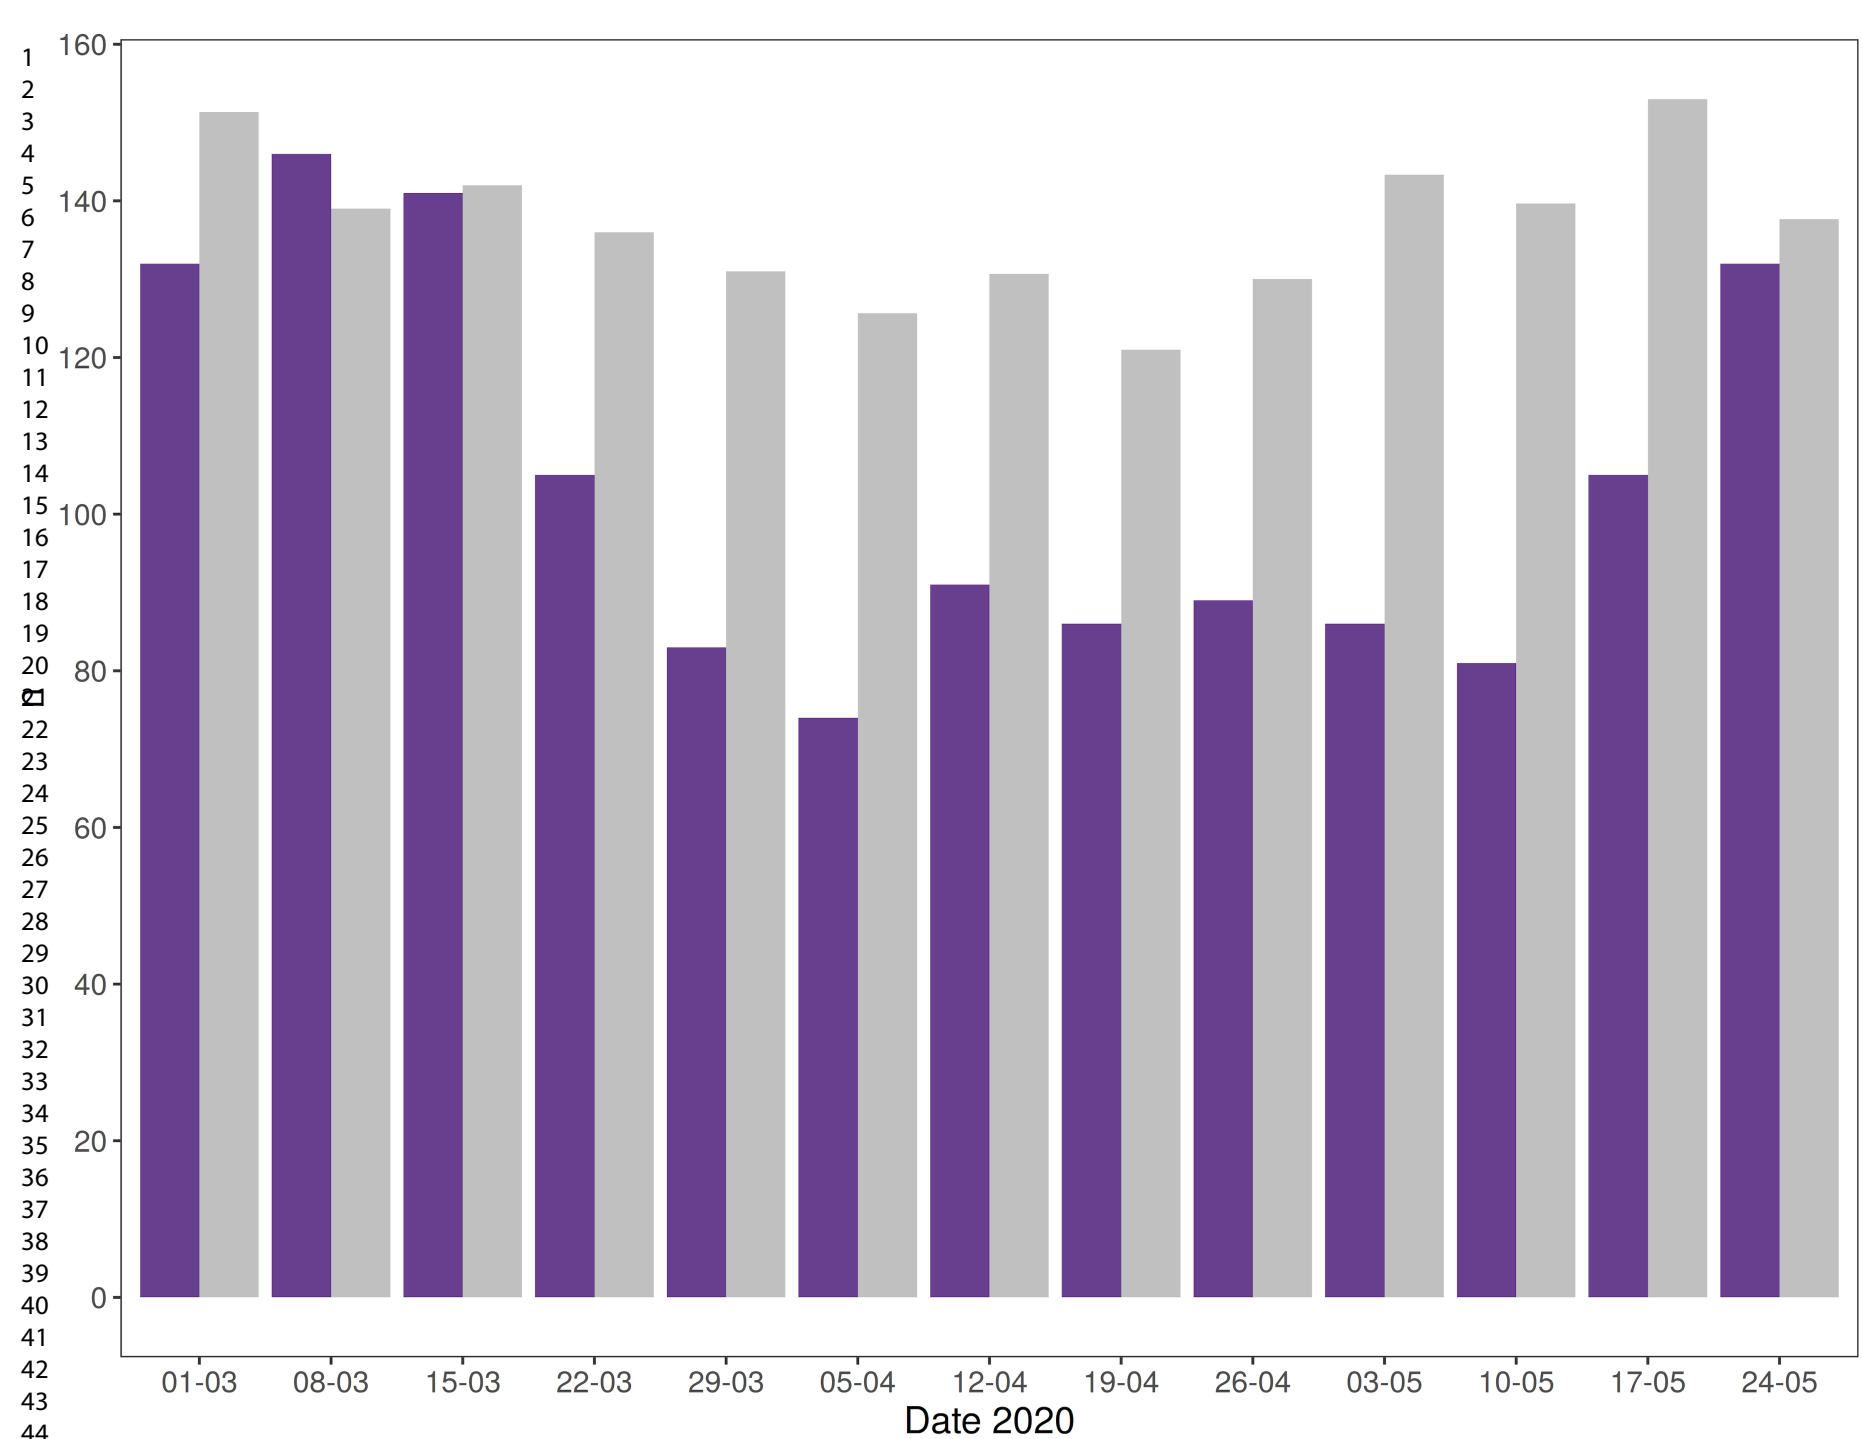

**b**

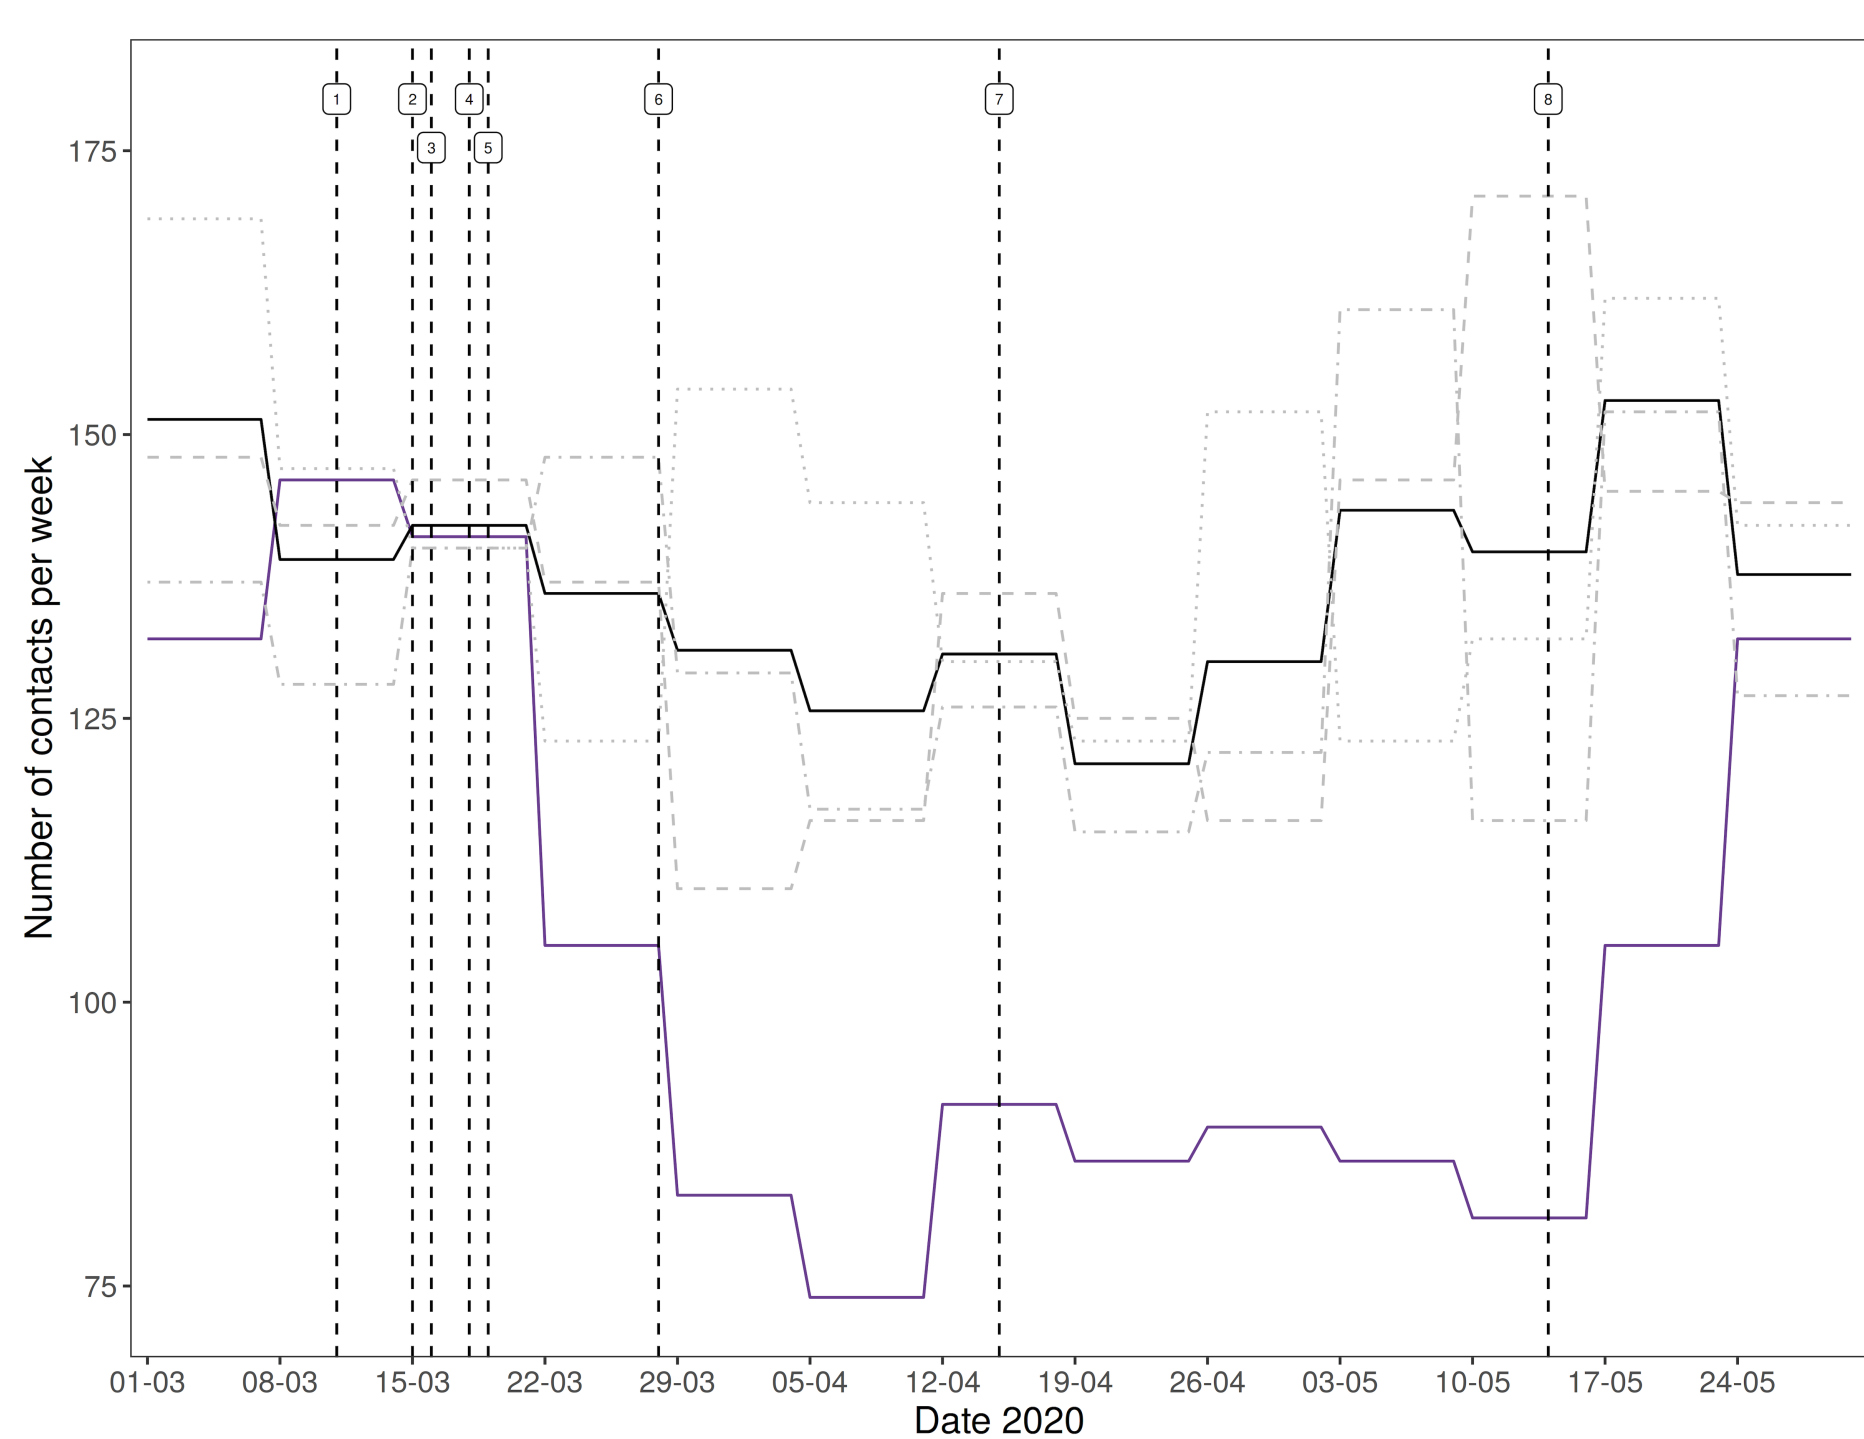

**c**

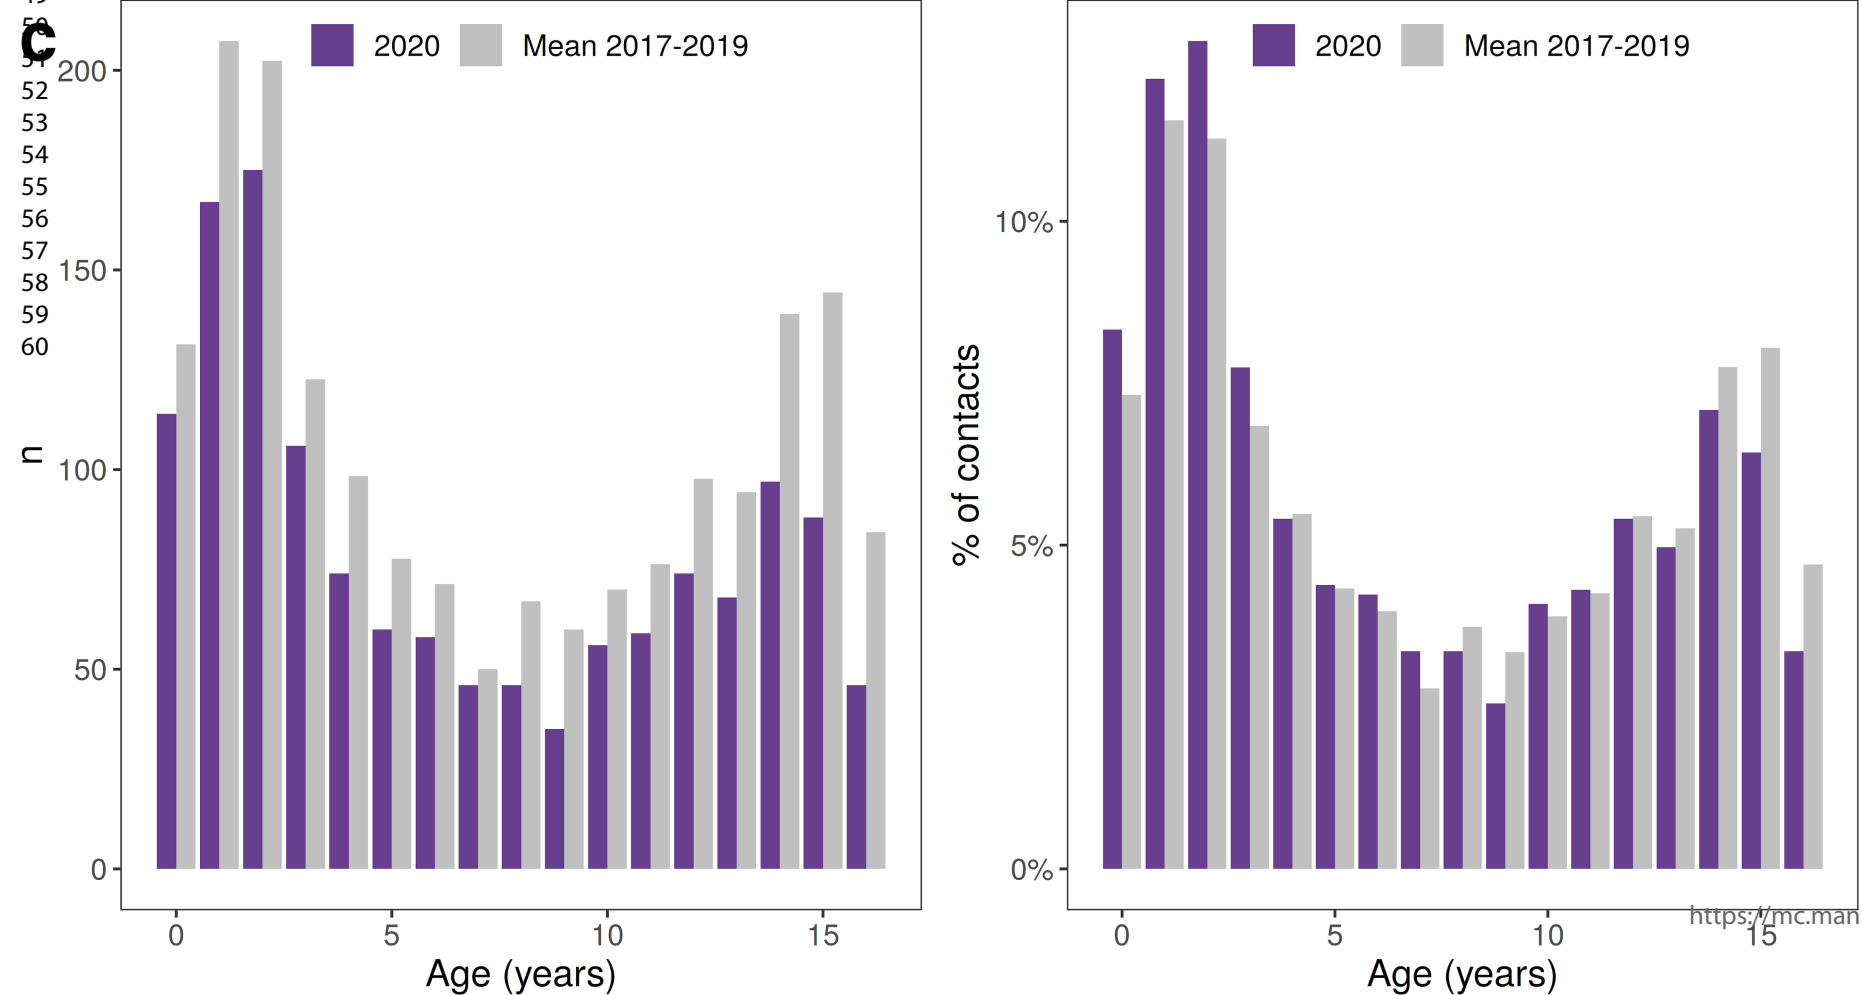

**d**

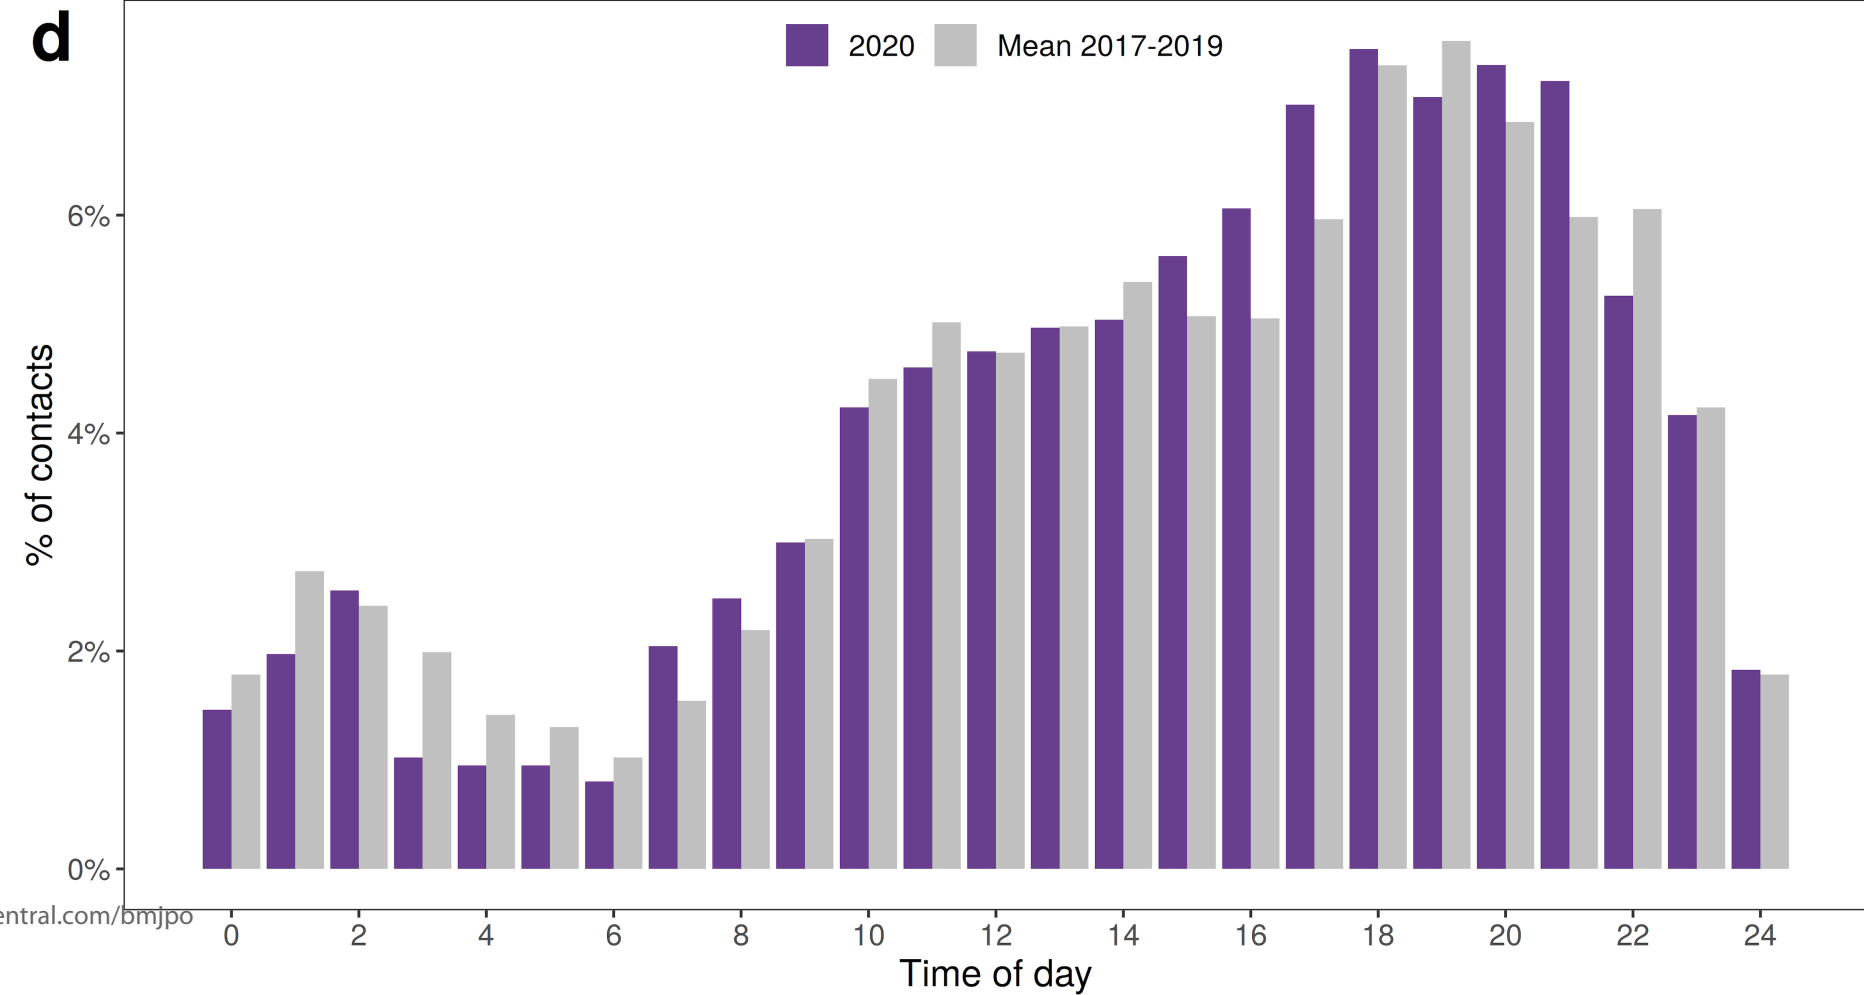

1  
2  
3  
4  
5  
6  
7  
8  
9  
10  
11  
12  
13  
14  
15  
16  
17  
18  
19  
20  
21  
22  
23  
24  
25  
26  
27  
28  
29  
30  
31  
32  
33  
34  
35  
36  
37  
38  
39

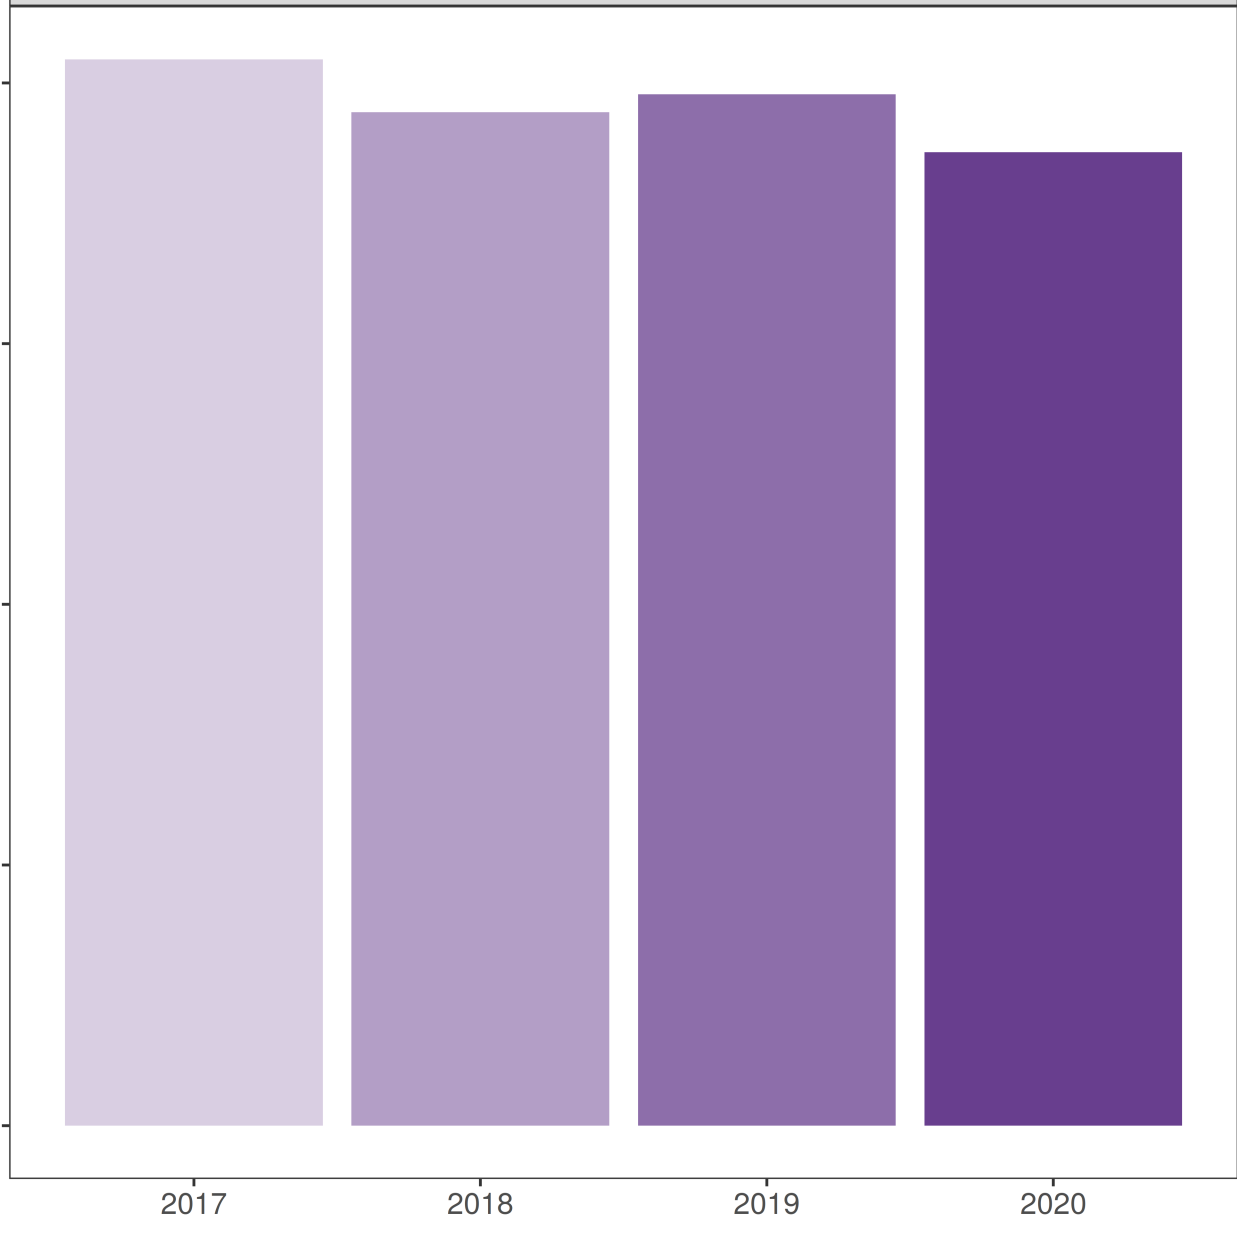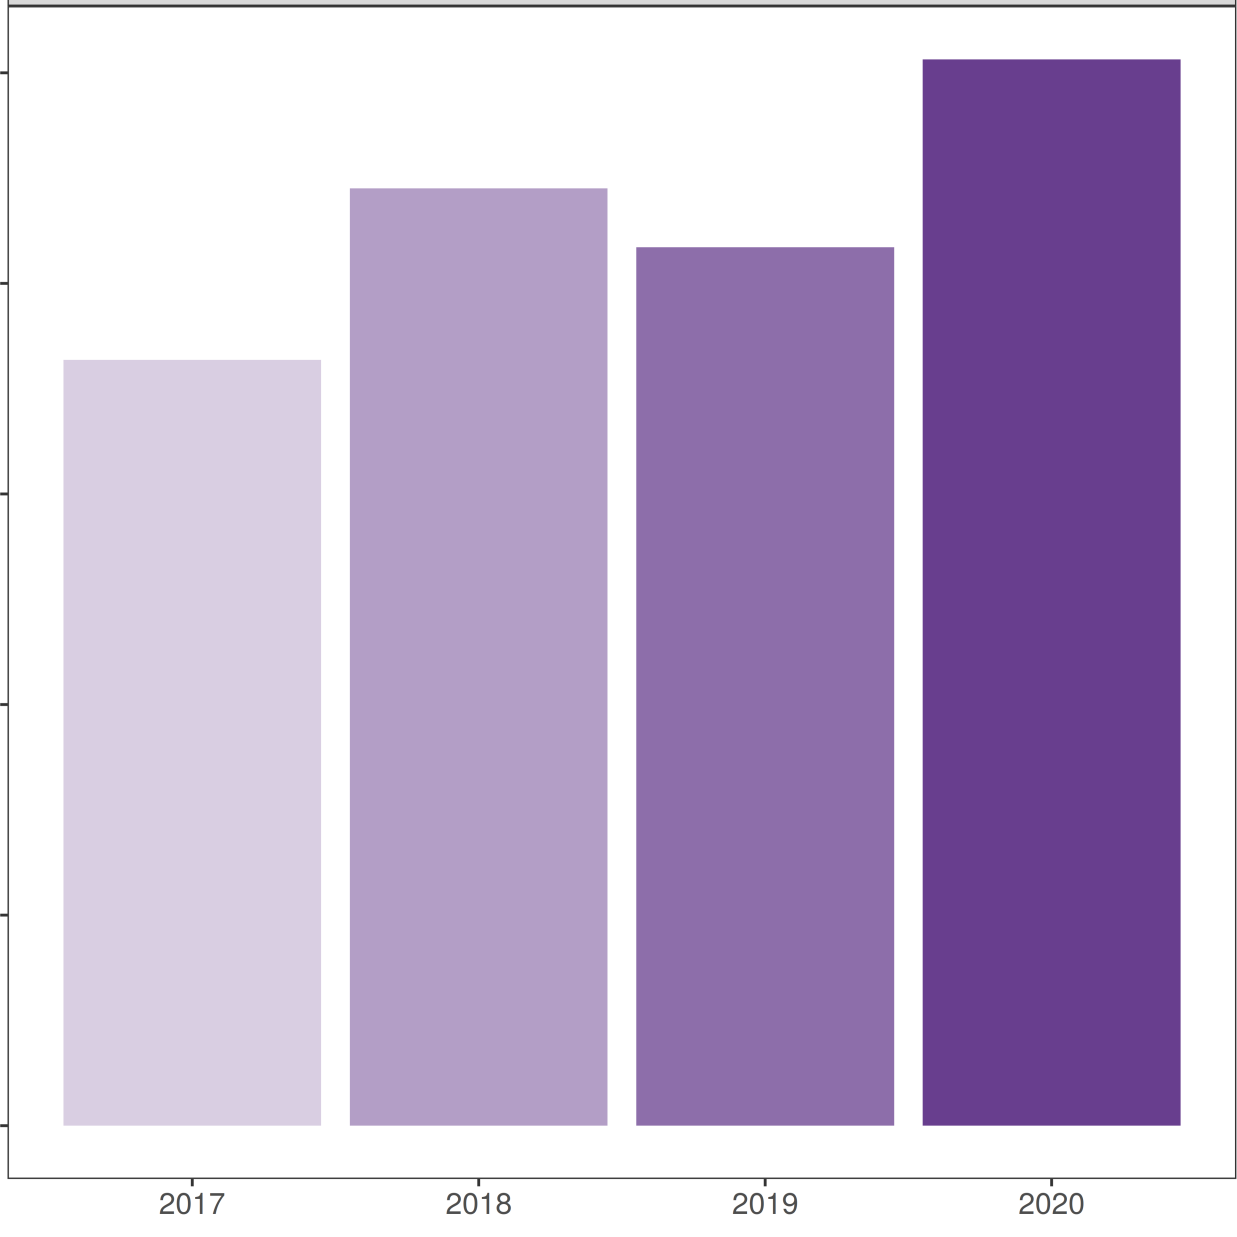

40  
41  
42  
43  
44  
45  
46  
47  
48  
49  
50  
51  
52  
53  
54  
55

— 2020 — Mean 2017-2019 - - - 2019 - - - 2018 - - - 2017

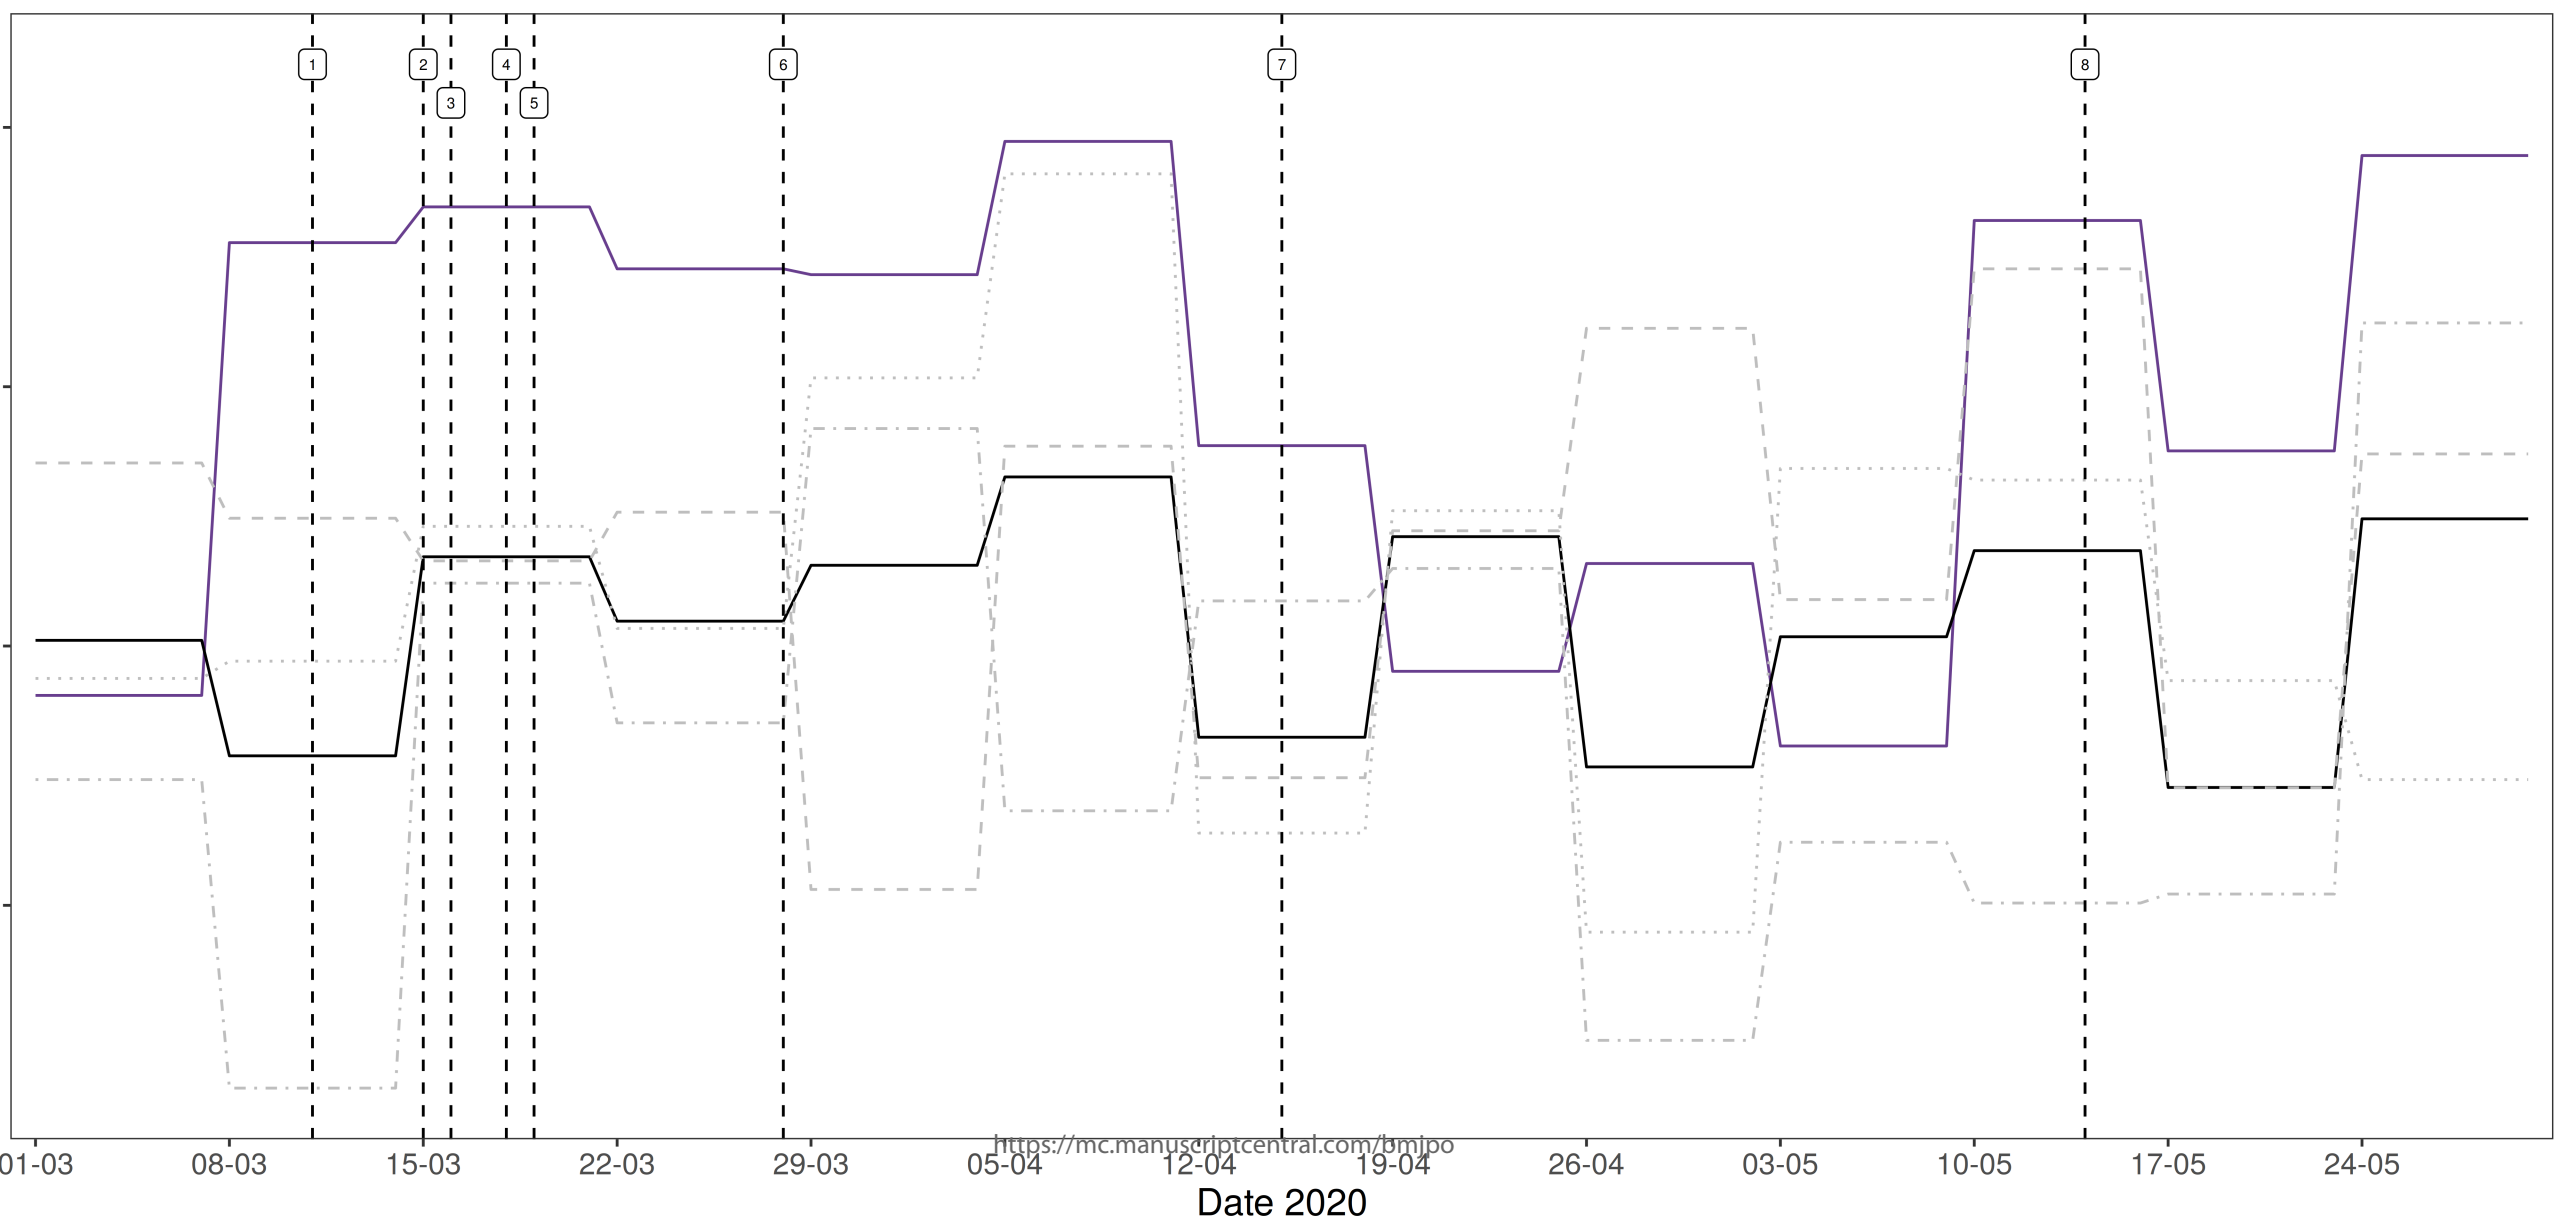

2020 Mean 2017-2019 2019 2018 2017

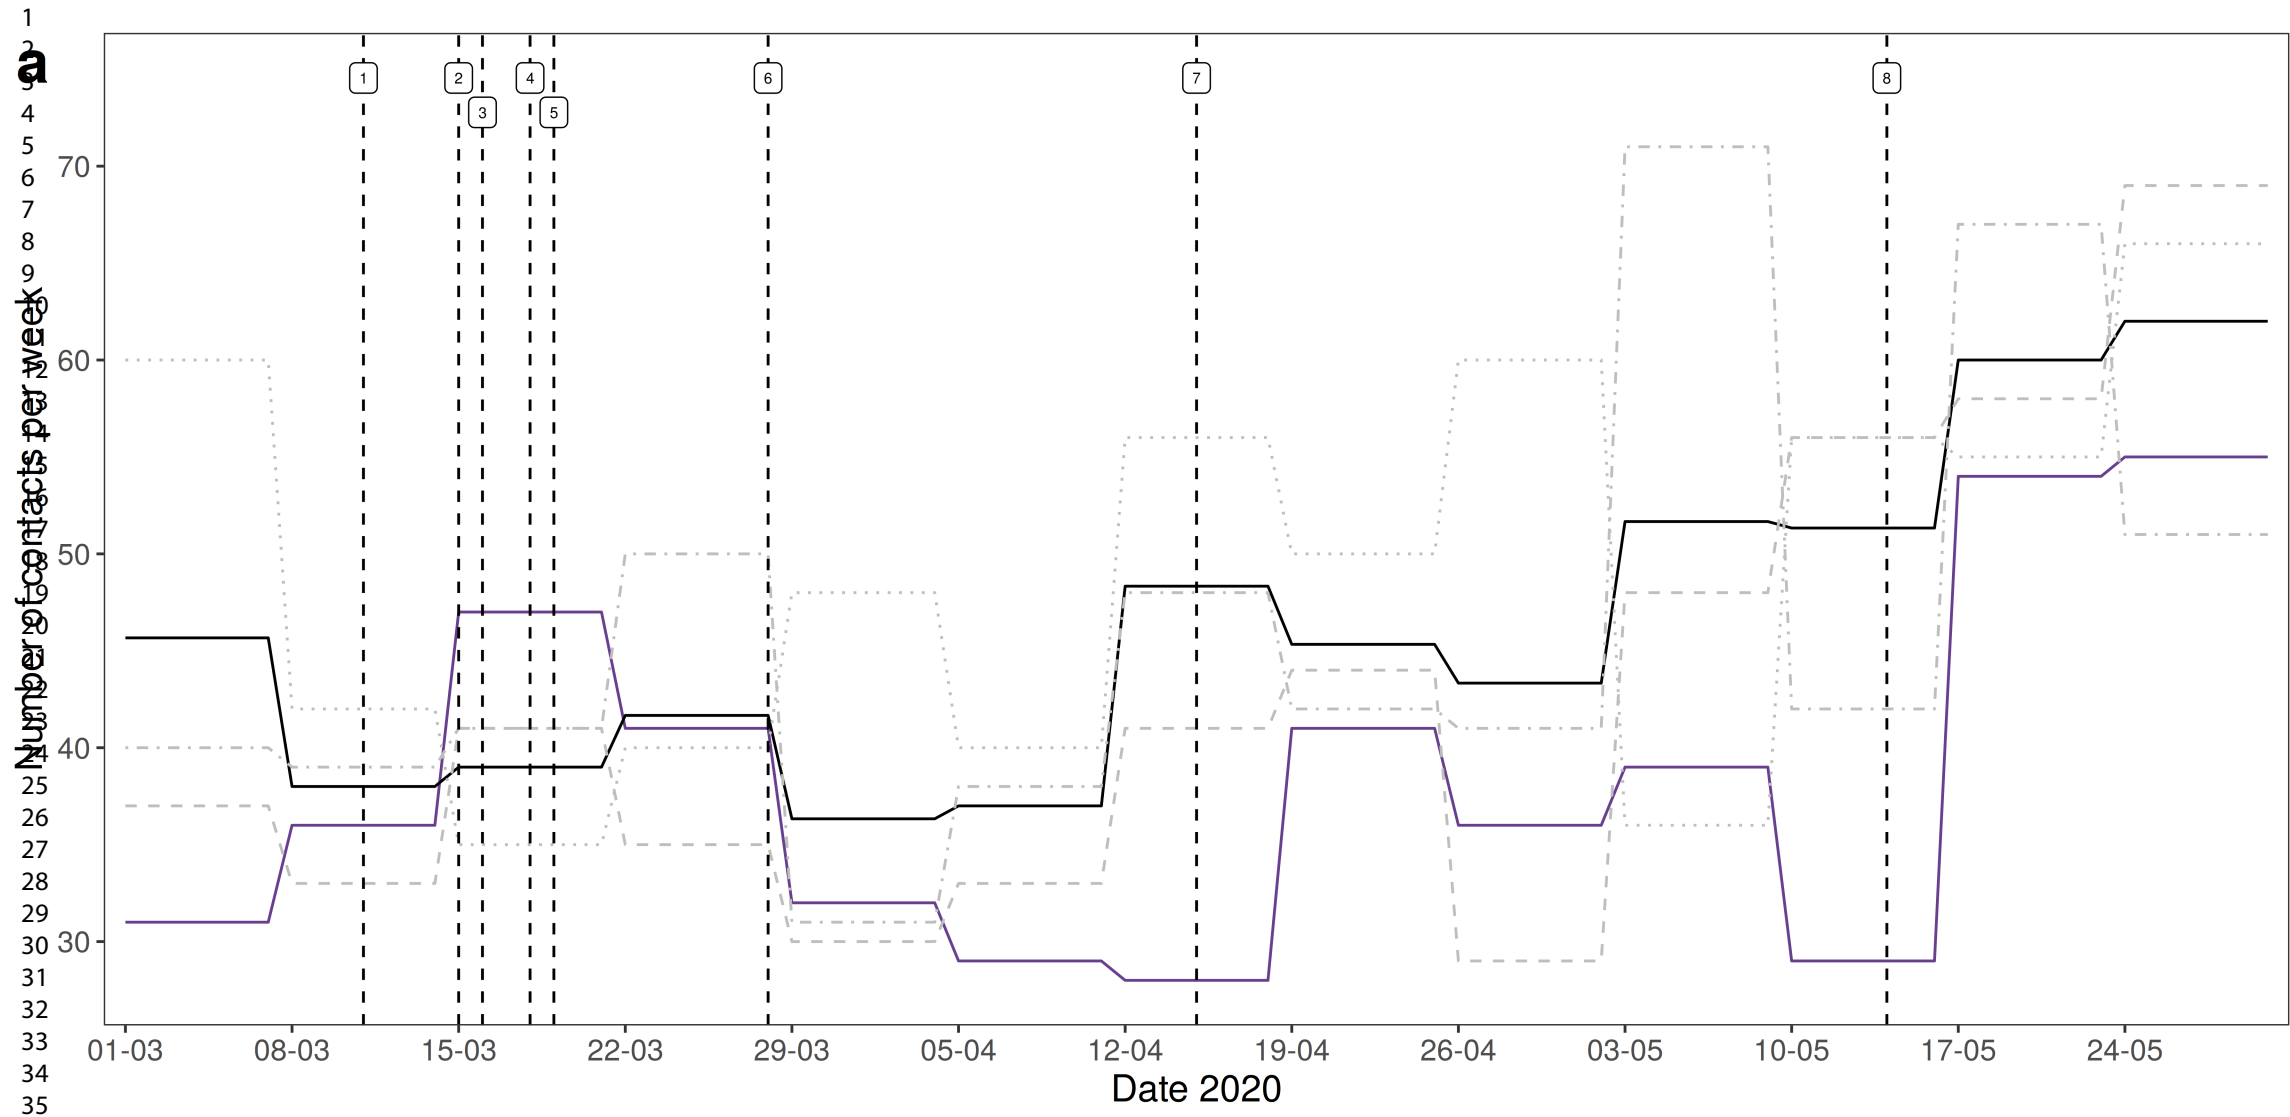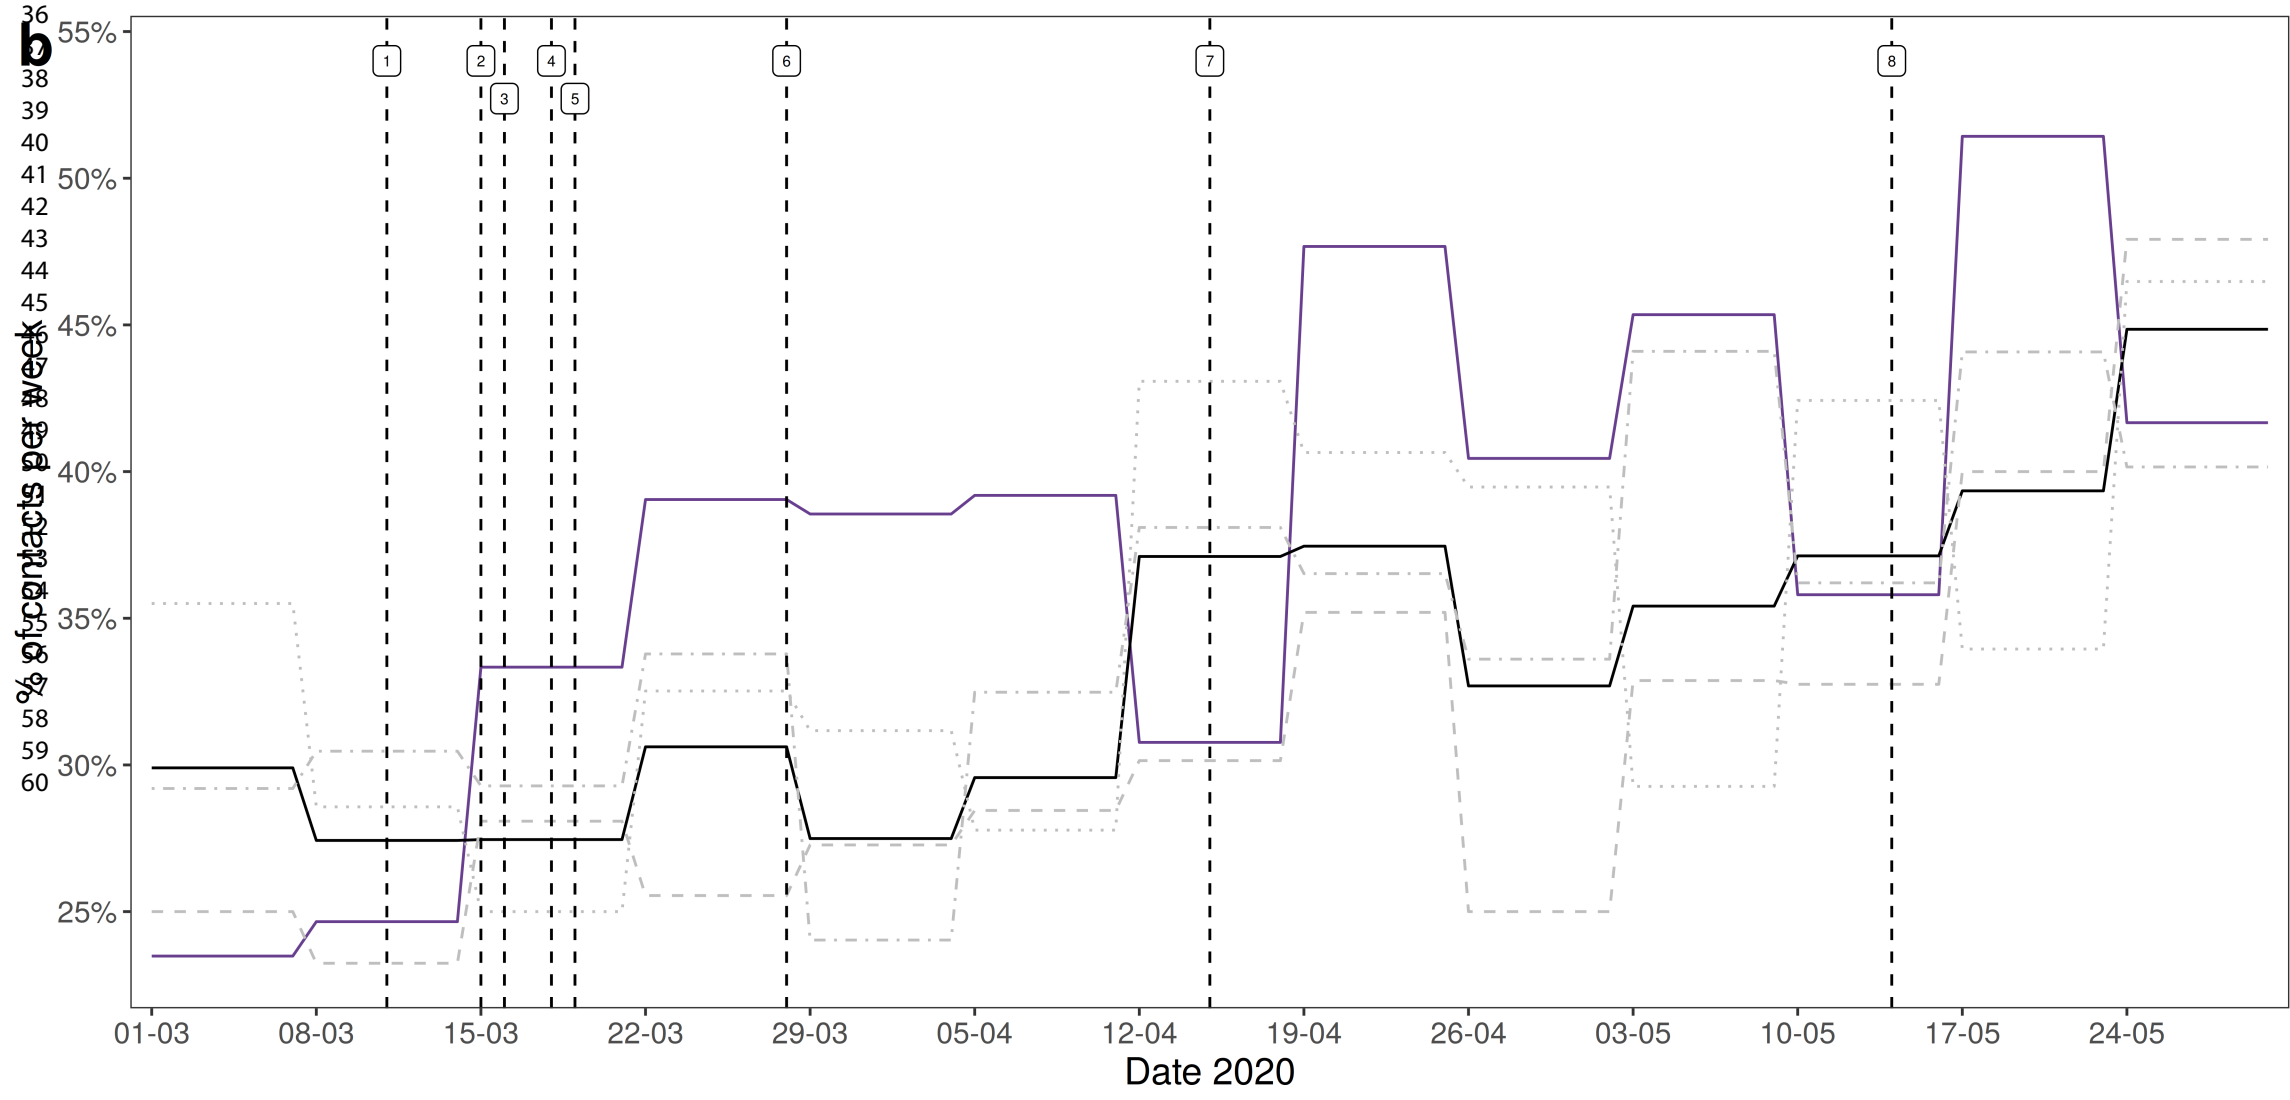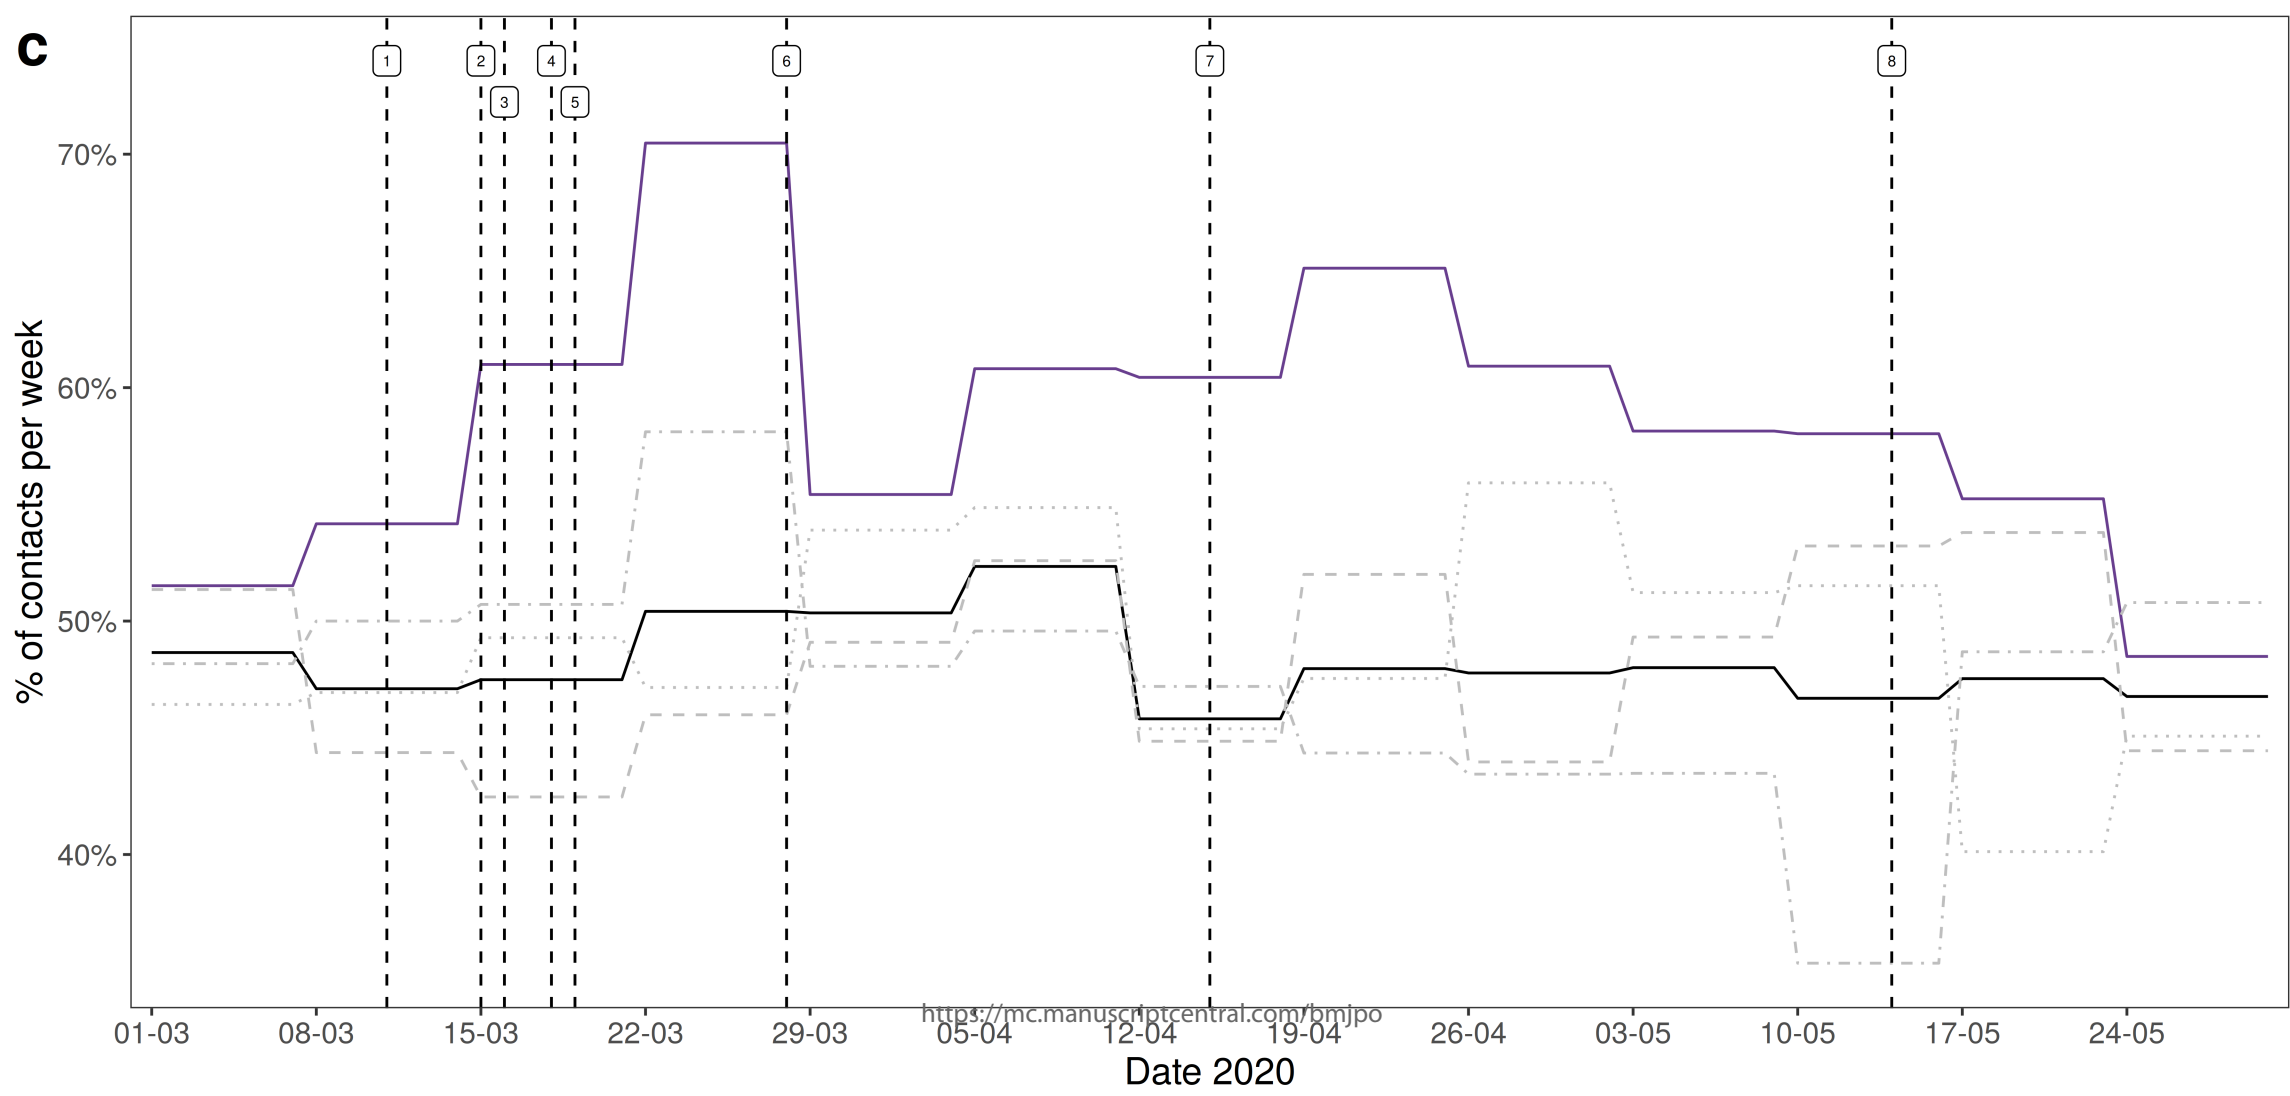



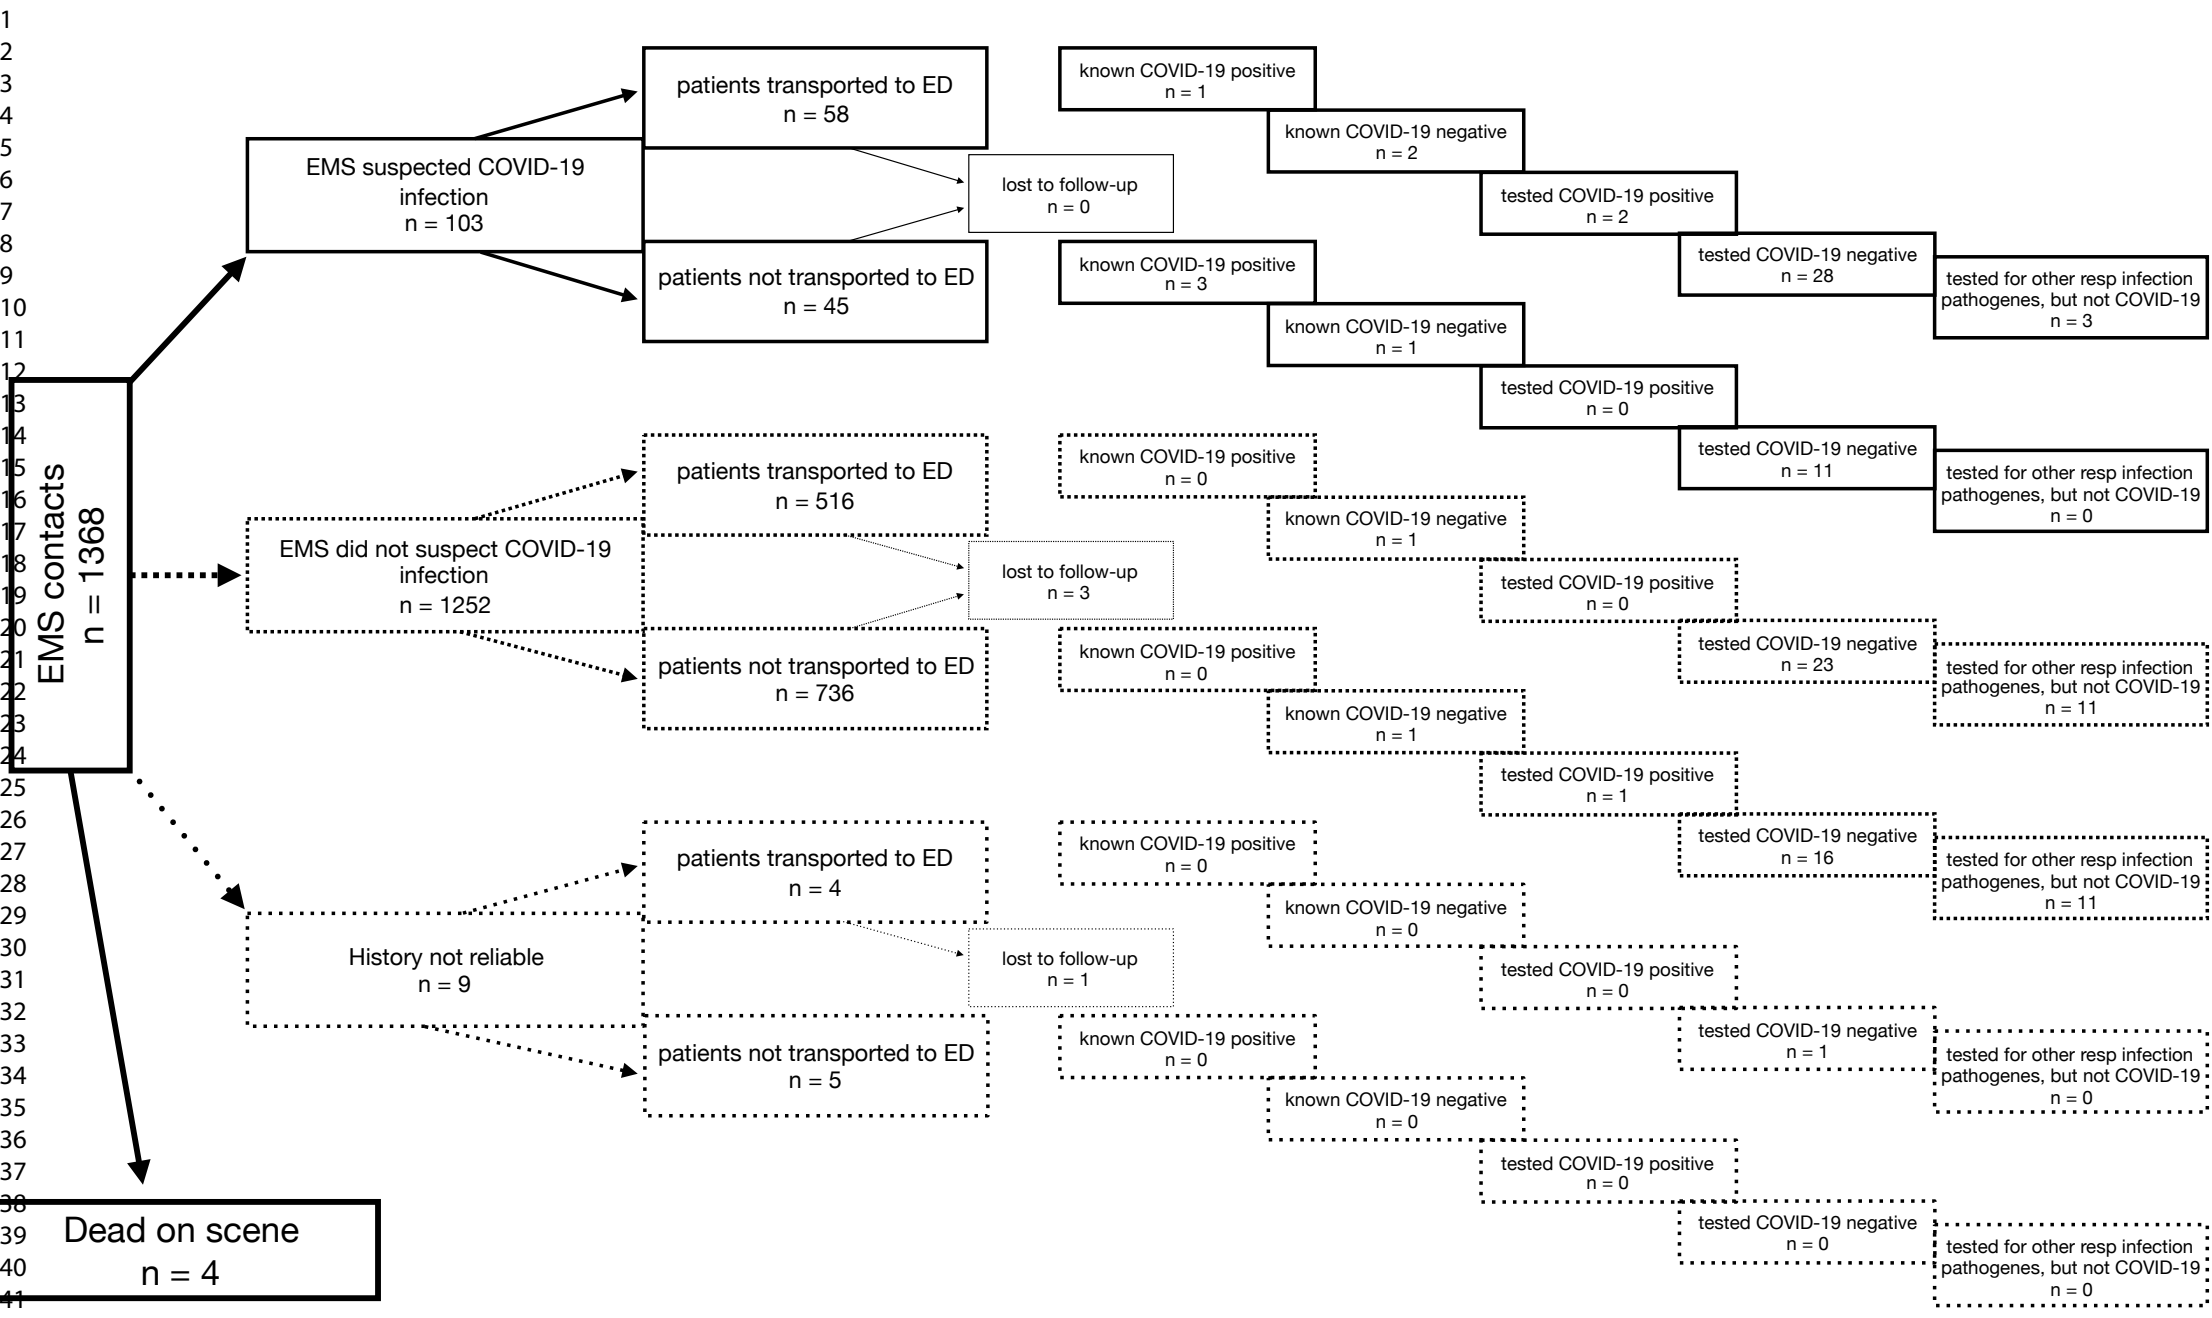

**STROBE 2007 (v4) Statement—Checklist of items that should be included in reports of *cohort studies***

| Section/Topic                | Item # | Recommendation                                                                                                                                                                       | Reported on page # |
|------------------------------|--------|--------------------------------------------------------------------------------------------------------------------------------------------------------------------------------------|--------------------|
| <b>Title and abstract</b>    | 1      | (a) Indicate the study's design with a commonly used term in the title or the abstract                                                                                               | #1                 |
|                              |        | (b) Provide in the abstract an informative and balanced summary of what was done and what was found                                                                                  | #4                 |
| <b>Introduction</b>          |        |                                                                                                                                                                                      |                    |
| Background/rationale         | 2      | Explain the scientific background and rationale for the investigation being reported                                                                                                 | #5                 |
| Objectives                   | 3      | State specific objectives, including any prespecified hypotheses                                                                                                                     | #5                 |
| <b>Methods</b>               |        |                                                                                                                                                                                      |                    |
| Study design                 | 4      | Present key elements of study design early in the paper                                                                                                                              | #5-#7              |
| Setting                      | 5      | Describe the setting, locations, and relevant dates, including periods of recruitment, exposure, follow-up, and data collection                                                      | #5-#7              |
| Participants                 | 6      | (a) Give the eligibility criteria, and the sources and methods of selection of participants. Describe methods of follow-up                                                           | #5-#7              |
|                              |        | (b) For matched studies, give matching criteria and number of exposed and unexposed                                                                                                  | n/a                |
| Variables                    | 7      | Clearly define all outcomes, exposures, predictors, potential confounders, and effect modifiers. Give diagnostic criteria, if applicable                                             | #5-#7              |
| Data sources/<br>measurement | 8*     | For each variable of interest, give sources of data and details of methods of assessment (measurement). Describe comparability of assessment methods if there is more than one group | #5-#7              |
| Bias                         | 9      | Describe any efforts to address potential sources of bias                                                                                                                            | #13                |
| Study size                   | 10     | Explain how the study size was arrived at                                                                                                                                            | #5-#7              |
| Quantitative variables       | 11     | Explain how quantitative variables were handled in the analyses. If applicable, describe which groupings were chosen and why                                                         | #7                 |
| Statistical methods          | 12     | (a) Describe all statistical methods, including those used to control for confounding                                                                                                | #7                 |
|                              |        | (b) Describe any methods used to examine subgroups and interactions                                                                                                                  | n/a                |
|                              |        | (c) Explain how missing data were addressed                                                                                                                                          | n/a                |
|                              |        | (d) If applicable, explain how loss to follow-up was addressed                                                                                                                       | Figure 4           |
|                              |        | (e) Describe any sensitivity analyses                                                                                                                                                | n/a                |
| <b>Results</b>               |        |                                                                                                                                                                                      |                    |

|                          |     |                                                                                                                                                                                                              |                                     |
|--------------------------|-----|--------------------------------------------------------------------------------------------------------------------------------------------------------------------------------------------------------------|-------------------------------------|
| Participants             | 13* | (a) Report numbers of individuals at each stage of study—eg numbers potentially eligible, examined for eligibility, confirmed eligible, included in the study, completing follow-up, and analysed            | Supplementary Material 2            |
|                          |     | (b) Give reasons for non-participation at each stage                                                                                                                                                         | n/a                                 |
|                          |     | (c) Consider use of a flow diagram                                                                                                                                                                           | Figure 4                            |
| Descriptive data         | 14* | (a) Give characteristics of study participants (eg demographic, clinical, social) and information on exposures and potential confounders                                                                     | Table 1                             |
|                          |     | (b) Indicate number of participants with missing data for each variable of interest                                                                                                                          | Figure 4                            |
|                          |     | (c) Summarise follow-up time (eg, average and total amount)                                                                                                                                                  | Table 2,4, Supplementary Material 2 |
| Outcome data             | 15* | Report numbers of outcome events or summary measures over time                                                                                                                                               | Table 2-4, Supplementary Material 2 |
| Main results             | 16  | (a) Give unadjusted estimates and, if applicable, confounder-adjusted estimates and their precision (eg, 95% confidence interval). Make clear which confounders were adjusted for and why they were included | Table 2-4, Supplementary Material 2 |
|                          |     | (b) Report category boundaries when continuous variables were categorized                                                                                                                                    | n/a                                 |
|                          |     | (c) If relevant, consider translating estimates of relative risk into absolute risk for a meaningful time period                                                                                             | n/a                                 |
| Other analyses           | 17  | Report other analyses done—eg analyses of subgroups and interactions, and sensitivity analyses                                                                                                               | Supplementary Material 2            |
| <b>Discussion</b>        |     |                                                                                                                                                                                                              |                                     |
| Key results              | 18  | Summarise key results with reference to study objectives                                                                                                                                                     | #10                                 |
| <b>Limitations</b>       |     |                                                                                                                                                                                                              |                                     |
| Interpretation           | 20  | Give a cautious overall interpretation of results considering objectives, limitations, multiplicity of analyses, results from similar studies, and other relevant evidence                                   | #10-14                              |
| Generalisability         | 21  | Discuss the generalisability (external validity) of the study results                                                                                                                                        | #13-14                              |
| <b>Other information</b> |     |                                                                                                                                                                                                              |                                     |
| Funding                  | 22  | Give the source of funding and the role of the funders for the present study and, if applicable, for the original study on which the present article is based                                                | #15                                 |

\*Give information separately for cases and controls in case-control studies and, if applicable, for exposed and unexposed groups in cohort and cross-sectional studies.

1  
2  
3  
4  
5 **Note:** An Explanation and Elaboration article discusses each checklist item and gives methodological background and published examples of transparent reporting. The STROBE  
6 checklist is best used in conjunction with this article (freely available on the Web sites of PLoS Medicine at <http://www.plosmedicine.org/>, Annals of Internal Medicine at  
7 <http://www.annals.org/>, and Epidemiology at <http://www.epidem.com/>). Information on the STROBE Initiative is available at [www.strobe-statement.org](http://www.strobe-statement.org).  
8  
9  
10  
11  
12  
13  
14  
15  
16  
17  
18  
19  
20  
21  
22  
23  
24  
25  
26  
27  
28  
29  
30  
31  
32  
33  
34  
35  
36  
37  
38  
39  
40  
41  
42  
43  
44  
45  
46  
47

Confidential: For Review Only

1 **Supplementary Table 1.** Descriptive statistics.

|                                      |                         | 2017                  | 2018                  | 2019                  | 2020                  |
|--------------------------------------|-------------------------|-----------------------|-----------------------|-----------------------|-----------------------|
| Age (years)                          |                         | 6.4<br>(2.0 - 13.2)   | 6.5<br>(1.9 - 12.6)   | 6.3<br>(2.1 - 12.5)   | 5.3<br>(1.8 - 12.0)   |
| Sex (male)                           | all n (%)               | 915 (53.2%)           | 980 (54.6%)           | 1001 (54.1%)          | 753 (55.1%)           |
|                                      | n per week median (IQR) | 67.0 (61.0 - 82.0)    | 75.0 (65.0 - 80.0)    | 76.0 (71.0 - 80.0)    | 53.0 (48.0 - 70.0)    |
|                                      | % per week median (IQR) | 55.3% (51.7% - 55.6%) | 55.2% (53.7% - 56.1%) | 52.3% (51.8% - 58.3%) | 54.3% (52.7% - 56.2%) |
| Native language (Finnish or Swedish) | all n (%)               | 1327 (81.8%)          | 1310 (77.7%)          | 1377 (79.1%)          | 991 (74.7%)           |
|                                      | n per week median (IQR) | 104.0 (91.0 - 109.0)  | 104.0 (91.0 - 106.0)  | 102.0 (95.0 - 110.0)  | 69.0 (66.0 - 91.0)    |
|                                      | % per week median (IQR) | 82.6% (78.8% - 84.8%) | 77.5% (76.3% - 79.1%) | 79.7% (76.8% - 80.7%) | 72.8% (71.8% - 78.4%) |

2 IQR = Interquartile Range

1 **Supplementary Table 2.** Change in the dispatch and transportation codes.

|                            |                         | 2017                  | 2018                  | 2019                  | 2020                  |
|----------------------------|-------------------------|-----------------------|-----------------------|-----------------------|-----------------------|
| All EMS contacts           | all n (%)               | 1724 (100.0%)         | 1801 (100.0%)         | 1858 (100.0%)         | 1369 (100.0%)         |
|                            | n per week median (IQR) | 128.0 (122.0 - 140.0) | 142.0 (125.0 - 146.0) | 142.0 (130.0 - 152.0) | 91.0 (86.0 - 132.0)   |
| Dispatch priority A*       | all n (%)               | 42 (2.4%)             | 43 (2.4%)             | 81 (4.4%)             | 90 (6.6%)             |
|                            | n per week median (IQR) | 3.0 (2.0 - 4.0)       | 3.0 (2.0 - 4.0)       | 5.0 (2.0 - 5.0)       | 8.0 (7.0 - 8.0)       |
|                            | % per week median (IQR) | 2.3% (1.6% - 2.6%)    | 2.1% (1.6% - 2.9%)    | 3.3% (1.6% - 4.1%)    | 6.1% (5.7% - 8.4%)    |
| Dispatch priority B*       | all n (%)               | 693 (40.2%)           | 677 (37.6%)           | 702 (37.8%)           | 478 (34.9%)           |
|                            | n per week median (IQR) | 53.0 (47.0 - 58.0)    | 49.0 (46.0 - 53.0)    | 53.0 (46.0 - 59.0)    | 37.0 (30.0 - 43.0)    |
|                            | % per week median (IQR) | 38.8% (37.3% - 42.3%) | 39.0% (32.4% - 40.4%) | 38.7% (34.4% - 40.7%) | 36.1% (31.5% - 38.1%) |
| Dispatch priority C*       | all n (%)               | 882 (51.2%)           | 969 (53.8%)           | 947 (51.0%)           | 658 (48.1%)           |
|                            | n per week median (IQR) | 65.0 (63.0 - 70.0)    | 74.0 (69.0 - 86.0)    | 72.0 (69.0 - 80.0)    | 44.0 (43.0 - 57.0)    |
|                            | % per week median (IQR) | 52.1% (50.4% - 54.3%) | 54.0% (51.7% - 56.0%) | 52.0% (47.3% - 56.9%) | 49.4% (45.7% - 51.4%) |
| Dispatch priority D*       | all n (%)               | 107 (6.2%)            | 112 (6.2%)            | 128 (6.9%)            | 143 (10.4%)           |
|                            | n per week median (IQR) | 7.0 (7.0 - 10.0)      | 8.0 (7.0 - 10.0)      | 10.0 (7.0 - 13.0)     | 10.0 (8.0 - 12.0)     |
|                            | % per week median (IQR) | 5.7% (4.8% - 7.1%)    | 5.8% (4.7% - 7.3%)    | 5.9% (5.6% - 8.8%)    | 9.5% (8.1% - 11.4%)   |
| Transported patients       | all n (%)               | 902 (52.4%)           | 930 (51.6%)           | 950 (51.2%)           | 578 (42.3%)           |
|                            | n per week median (IQR) | 67.0 (64.0 - 71.0)    | 74.0 (65.0 - 79.0)    | 71.0 (65.0 - 78.0)    | 36.0 (34.0 - 54.0)    |
|                            | % per week median (IQR) | 51.8% (50.0% - 55.7%) | 50.9% (48.0% - 55.6%) | 52.5% (48.5% - 53.8%) | 41.9% (39.1% - 44.8%) |
| Transportation priority A* | all n (%)               | 8 (0.5%)              | 15 (0.8%)             | 14 (0.8%)             | 6 (0.4%)              |
|                            | n per week median (IQR) | 1.0 (1.0 - 1.8)       | 1.0 (1.0 - 2.0)       | 1.0 (1.0 - 2.0)       | 1.0 (1.0 - 1.0)       |
|                            | % per week median (IQR) | 0.9% (0.8% - 1.2%)    | 0.8% (0.7% - 1.4%)    | 0.8% (0.7% - 1.3%)    | 1.2% (0.9% - 1.2%)    |
| Transportation priority B* | all n (%)               | 89 (5.2%)             | 84 (4.7%)             | 104 (5.6%)            | 62 (4.5%)             |
|                            | n per week median (IQR) | 6.0 (5.0 - 8.0)       | 7.0 (4.0 - 8.0)       | 8.0 (5.0 - 11.0)      | 5.0 (3.0 - 5.0)       |
|                            | % per week median (IQR) | 4.7% (3.9% - 5.7%)    | 5.1% (3.4% - 5.5%)    | 6.4% (3.4% - 6.6%)    | 5.0% (3.5% - 5.7%)    |
| Transportation priority C* | all n (%)               | 587 (34.1%)           | 601 (33.4%)           | 618 (33.3%)           | 398 (29.2%)           |
|                            | n per week median (IQR) | 44.0 (40.0 - 47.0)    | 47.0 (42.0 - 50.0)    | 45.0 (41.0 - 50.0)    | 25.0 (22.0 - 41.0)    |
|                            | % per week median (IQR) | 33.3% (32.0% - 36.6%) | 34.2% (30.4% - 37.1%) | 33.3% (29.6% - 35.1%) | 29.1% (25.6% - 31.2%) |
| Transportation priority D* | all n (%)               | 218 (12.7%)           | 230 (12.8%)           | 213 (11.5%)           | 113 (8.3%)            |
|                            | n per week median (IQR) | 15.0 (13.0 - 20.0)    | 17.0 (14.0 - 21.0)    | 15.0 (14.0 - 19.0)    | 7.0 (6.0 - 9.0)       |
|                            | % per week median (IQR) | 13.0% (10.3% - 14.6%) | 12.9% (11.7% - 14.4%) | 11.3% (9.9% - 13.2%)  | 7.4% (6.6% - 8.6%)    |
| Trauma patients            | all n (%)               | 605 (35.1%)           | 564 (31.3%)           | 649 (34.9%)           | 504 (36.8%)           |
|                            | n per week median (IQR) | 42.0 (40.0 - 50.0)    | 41.0 (33.0 - 48.0)    | 50.0 (40.0 - 56.0)    | 36.0 (31.0 - 41.0)    |
|                            | % per week median (IQR) | 33.8% (30.5% - 38.1%) | 28.4% (25.5% - 32.9%) | 34.0% (29.3% - 40.7%) | 39.0% (33.3% - 41.7%) |
| Non-transported patients   | all n (%)               | 820 (47.6%)           | 871 (48.4%)           | 907 (48.9%)           | 786 (57.6%)           |
|                            | n per week median (IQR) | 64.0 (58.0 - 70.0)    | 63.0 (61.0 - 72.0)    | 68.0 (63.0 - 78.0)    | 56.0 (50.0 - 68.0)    |
|                            | % per week median (IQR) | 48.2% (44.3% - 50.0%) | 49.1% (44.4% - 52.0%) | 47.5% (46.4% - 51.5%) | 58.1% (55.2% - 60.9%) |

2 \* the priority class from A to D refers to the urgency of the dispatch /transportation and /or to the risk of  
3 the symptom to a patient – A being the contact with highest urgency and risk and D the lowest urgency and  
4 risk

5 EMS = Emergency Medical Services

6 IQR = Interquartile Range

7

1 **Supplementary Table 3.** Change in the interventions performed on-scene

|                                        |                         | 2017                  | 2018                  | 2019                  | 2020                  |
|----------------------------------------|-------------------------|-----------------------|-----------------------|-----------------------|-----------------------|
| additional help requested              | all n (%)               | 81 (4.7%)             | 74 (4.1%)             | 105 (5.7%)            | 94 (6.9%)             |
|                                        | n per week median (IQR) | 6.0 (5.0 - 6.0)       | 5.0 (3.0 - 8.0)       | 7.0 (5.0 - 7.0)       | 7.0 (5.0 - 9.0)       |
|                                        | % per week median (IQR) | 4.1% (3.9% - 4.7%)    | 3.4% (2.6% - 4.9%)    | 4.5% (4.1% - 5.4%)    | 6.8% (4.5% - 8.5%)    |
| MICU on-scene                          | all n (%)               | 25 (1.5%)             | 23 (1.3%)             | 30 (1.6%)             | 24 (1.8%)             |
|                                        | n per week median (IQR) | 2.0 (1.8 - 2.2)       | 2.0 (1.5 - 2.0)       | 2.0 (1.5 - 3.5)       | 2.0 (2.0 - 2.8)       |
|                                        | % per week median (IQR) | 1.6% (1.2% - 1.9%)    | 1.4% (1.0% - 1.7%)    | 1.6% (1.1% - 2.6%)    | 2.3% (1.4% - 2.5%)    |
| emergency physician consulted by phone | all n (%)               | 308 (17.9%)           | 261 (14.5%)           | 305 (16.4%)           | 236 (17.2%)           |
|                                        | n per week median (IQR) | 23.0 (22.0 - 27.0)    | 20.0 (18.0 - 23.0)    | 23.0 (21.0 - 25.0)    | 18.0 (15.0 - 20.0)    |
|                                        | % per week median (IQR) | 17.9% (16.8% - 20.0%) | 15.4% (11.6% - 17.6%) | 16.0% (14.3% - 18.5%) | 17.6% (15.6% - 18.1%) |
| any measurements done on-scene         | all n (%)               | 1615 (93.7%)          | 1695 (94.1%)          | 1769 (95.2%)          | 1280 (93.5%)          |
|                                        | n per week median (IQR) | 120.0 (116.0 - 130.0) | 131.0 (112.0 - 141.0) | 135.0 (121.0 - 144.0) | 88.0 (78.0 - 124.0)   |
|                                        | % per week median (IQR) | 93.0% (92.2% - 94.9%) | 94.9% (93.0% - 95.5%) | 95.7% (93.8% - 96.3%) | 93.9% (91.9% - 95.3%) |
| intubation*                            | all n (%)               | 2 (0.1%)              | 3 (0.2%)              | 1 (0.1%)              | 3 (0.2%)              |
|                                        | n per week median (IQR) | 1.0 (1.0 - 1.0)       | 1.0 (1.0 - 1.0)       | 1.0 (1.0 - 1.0)       | 1.5 (1.2 - 1.8)       |
|                                        | % per week median (IQR) | 0.8% (0.8% - 0.8%)    | 0.7% (0.7% - 0.7%)    | 0.6% (0.6% - 0.6%)    | 1.3% (1.2% - 1.3%)    |
| supplementary oxygen given             | all n (%)               | 38 (2.2%)             | 47 (2.6%)             | 40 (2.2%)             | 16 (1.2%)             |
|                                        | n per week median (IQR) | 3.0 (2.0 - 4.0)       | 3.0 (2.0 - 5.0)       | 3.0 (2.0 - 4.5)       | 2.0 (1.0 - 2.2)       |
|                                        | % per week median (IQR) | 2.4% (1.6% - 2.8%)    | 2.2% (1.7% - 3.6%)    | 2.4% (1.3% - 3.0%)    | 1.5% (1.2% - 2.4%)    |
| intravenous connection established     | all n (%)               | 128 (7.4%)            | 123 (6.8%)            | 149 (8.0%)            | 65 (4.7%)             |
|                                        | n per week median (IQR) | 10.0 (8.0 - 11.0)     | 9.0 (7.0 - 11.0)      | 10.0 (10.0 - 14.0)    | 5.0 (3.0 - 7.0)       |
|                                        | % per week median (IQR) | 8.5% (5.6% - 8.7%)    | 6.4% (5.8% - 7.5%)    | 8.0% (6.5% - 8.9%)    | 4.4% (2.9% - 5.8%)    |
| any medication given                   | all n (%)               | 170 (9.9%)            | 206 (11.4%)           | 209 (11.2%)           | 111 (8.1%)            |
|                                        | n per week median (IQR) | 14.0 (12.0 - 15.0)    | 14.0 (14.0 - 18.0)    | 15.0 (13.0 - 18.0)    | 7.0 (6.0 - 9.0)       |
|                                        | % per week median (IQR) | 10.4% (8.8% - 12.1%)  | 10.3% (9.6% - 12.5%)  | 10.7% (9.0% - 13.1%)  | 7.6% (6.6% - 9.1%)    |
| medication given per os                | all n (%)               | 12 (0.7%)             | 16 (0.9%)             | 11 (0.6%)             | 13 (0.9%)             |
|                                        | n per week median (IQR) | 1.5 (1.0 - 2.0)       | 2.0 (1.0 - 2.0)       | 1.0 (1.0 - 2.0)       | 2.0 (1.0 - 2.0)       |
|                                        | % per week median (IQR) | 1.2% (0.8% - 1.6%)    | 1.4% (0.7% - 1.7%)    | 0.8% (0.7% - 1.3%)    | 1.4% (1.2% - 1.7%)    |
| inhalation given                       | all n (%)               | 41 (2.4%)             | 80 (4.4%)             | 69 (3.7%)             | 18 (1.3%)             |
|                                        | n per week median (IQR) | 3.5 (2.0 - 4.2)       | 4.0 (4.0 - 8.0)       | 5.0 (3.0 - 7.0)       | 1.0 (1.0 - 3.5)       |
|                                        | % per week median (IQR) | 2.3% (1.7% - 3.2%)    | 3.4% (2.7% - 5.5%)    | 3.8% (2.4% - 4.9%)    | 1.2% (1.1% - 2.7%)    |
| invasive** medication given            | all n (%)               | 113 (6.6%)            | 100 (5.6%)            | 126 (6.8%)            | 84 (6.1%)             |
|                                        | n per week median (IQR) | 9.0 (7.0 - 10.0)      | 7.0 (6.0 - 10.0)      | 9.0 (7.0 - 11.0)      | 6.0 (5.0 - 7.0)       |
|                                        | % per week median (IQR) | 7.1% (5.4% - 8.2%)    | 5.6% (4.2% - 6.8%)    | 6.5% (4.6% - 8.5%)    | 5.8% (4.9% - 7.5%)    |
| medication given per rectum            | all n (%)               | 8 (0.5%)              | 14 (0.8%)             | 9 (0.5%)              | 3 (0.2%)              |
|                                        | n per week median (IQR) | 1.0 (1.0 - 1.0)       | 1.0 (1.0 - 3.0)       | 1.5 (1.0 - 2.0)       | 1.0 (1.0 - 1.0)       |
|                                        | % per week median (IQR) | 0.8% (0.7% - 0.8%)    | 0.8% (0.7% - 2.2%)    | 1.1% (0.7% - 1.5%)    | 1.1% (0.9% - 1.1%)    |
| temperature measured                   | all n (%)               | 939 (54.5%)           | 1082 (60.1%)          | 1107 (59.6%)          | 851 (62.2%)           |
|                                        | n per week median (IQR) | 71.0 (68.0 - 79.0)    | 85.0 (72.0 - 92.0)    | 81.0 (78.0 - 97.0)    | 56.0 (52.0 - 82.0)    |
|                                        | % per week median (IQR) | 55.5% (50.9% - 58.1%) | 59.3% (56.0% - 65.5%) | 60.5% (55.6% - 63.3%) | 63.0% (60.5% - 63.7%) |

2 \* not enough data for calculating difference in intubation rates

3 \*\* invasive means any intravenous or intranasal or intramuscular or intraosseal medication given

4 MICU = mobile intensive care unit

# BMJ Paediatrics Open

## Paediatric prehospital emergencies and restrictions during the COVID-19 pandemic: a population-based study

|                               |                                                                                                                                                                                                                                                                                                                                                                                                                                                                                                                                                                                                                                                                                                                                                                                                                                                                                                                                                                                                                  |
|-------------------------------|------------------------------------------------------------------------------------------------------------------------------------------------------------------------------------------------------------------------------------------------------------------------------------------------------------------------------------------------------------------------------------------------------------------------------------------------------------------------------------------------------------------------------------------------------------------------------------------------------------------------------------------------------------------------------------------------------------------------------------------------------------------------------------------------------------------------------------------------------------------------------------------------------------------------------------------------------------------------------------------------------------------|
| Journal:                      | <i>BMJ Paediatrics Open</i>                                                                                                                                                                                                                                                                                                                                                                                                                                                                                                                                                                                                                                                                                                                                                                                                                                                                                                                                                                                      |
| Manuscript ID                 | bmjpo-2020-000808.R1                                                                                                                                                                                                                                                                                                                                                                                                                                                                                                                                                                                                                                                                                                                                                                                                                                                                                                                                                                                             |
| Article Type:                 | Original research                                                                                                                                                                                                                                                                                                                                                                                                                                                                                                                                                                                                                                                                                                                                                                                                                                                                                                                                                                                                |
| Date Submitted by the Author: | 08-Sep-2020                                                                                                                                                                                                                                                                                                                                                                                                                                                                                                                                                                                                                                                                                                                                                                                                                                                                                                                                                                                                      |
| Complete List of Authors:     | <p>Oulasvirta, Jelena; Helsinki University Central Hospital, Division of Anaesthesiology; Department of Anaesthesiology, Intensive Care and Pain Medicine; University of Helsinki Hospital, Department of Emergency Medicine and Services</p> <p>Pirneskoski, Jussi; Helsinki University Central Hospital, Department of Emergency Medicine and Services</p> <p>Harve-Rytsälä, Heini; Helsinki University Central Hospital, Department of Emergency Medicine and Services</p> <p>Lääperi, Mitja; Helsinki University Central Hospital, Department of Emergency Medicine and Services</p> <p>Kuitunen, Mikael; Helsinki University Central Hospital, New Children's Hospital</p> <p>Kuisma, Markku; Helsinki University Central Hospital, Department of Emergency Medicine and Services</p> <p>Salmi, Heli; Helsinki University Central Hospital, Division of Anaesthesiology; Department of Anaesthesiology, Intensive Care and Pain Medicine; Helsinki University Central Hospital, New Children's Hospital</p> |
| Keywords:                     | Epidemiology, Health services research                                                                                                                                                                                                                                                                                                                                                                                                                                                                                                                                                                                                                                                                                                                                                                                                                                                                                                                                                                           |
|                               |                                                                                                                                                                                                                                                                                                                                                                                                                                                                                                                                                                                                                                                                                                                                                                                                                                                                                                                                                                                                                  |

SCHOLARONE™  
Manuscripts





I, the Submitting Author has the right to grant and does grant on behalf of all authors of the Work (as defined in the below author licence), an exclusive licence and/or a non-exclusive licence for contributions from authors who are: i) UK Crown employees; ii) where BMJ has agreed a CC-BY licence shall apply, and/or iii) in accordance with the terms applicable for US Federal Government officers or employees acting as part of their official duties; on a worldwide, perpetual, irrevocable, royalty-free basis to BMJ Publishing Group Ltd ("BMJ") its licensees and where the relevant Journal is co-owned by BMJ to the co-owners of the Journal, to publish the Work in this journal and any other BMJ products and to exploit all rights, as set out in our [licence](#).

The Submitting Author accepts and understands that any supply made under these terms is made by BMJ to the Submitting Author unless you are acting as an employee on behalf of your employer or a postgraduate student of an affiliated institution which is paying any applicable article publishing charge ("APC") for Open Access articles. Where the Submitting Author wishes to make the Work available on an Open Access basis (and intends to pay the relevant APC), the terms of reuse of such Open Access shall be governed by a Creative Commons licence – details of these licences and which [Creative Commons](#) licence will apply to this Work are set out in our licence referred to above.

Other than as permitted in any relevant BMJ Author's Self Archiving Policies, I confirm this Work has not been accepted for publication elsewhere, is not being considered for publication elsewhere and does not duplicate material already published. I confirm all authors consent to publication of this Work and authorise the granting of this licence.

1  
2  
3  
4 1 Paediatric prehospital emergencies and restrictions during the

5  
6  
7  
8 2 COVID-19 pandemic: a population-based study

9  
10  
11  
12 3  
13  
14  
15 4 Jelena Oulasvirta, MD<sup>1,2</sup>

16  
17  
18 5 Jussi Pirneskoski, MD<sup>2</sup>

19  
20  
21 6 Heini Harve-Rytsälä, MD, PhD<sup>2</sup>

22  
23  
24 7 Mitja Lääperi, MSc<sup>2</sup>

25  
26  
27 8 Mikael Kuitunen, MD, PhD<sup>3</sup>

28  
29  
30 9 Markku Kuisma, MD, PhD<sup>2</sup>

31  
32  
33 10 Heli Salmi, MD, PhD<sup>1,3</sup>

34  
35  
36 11

37  
38 12 <sup>1</sup>Division of Anaesthesiology; Department of Anaesthesiology, Intensive Care and Pain Medicine; University  
39  
40 of Helsinki and Helsinki University Hospital, P.O. Box 340, FI-00029 HUS, Finland

41  
42  
43 14 <sup>2</sup>Department of Emergency Medicine and Services, Helsinki University and Helsinki University Hospital, P.O.  
44  
45 Box 340, FI-00029 HUS, Finland

46  
47  
48 16 <sup>3</sup>New Children's Hospital, University of Helsinki and Helsinki University Hospital, P.O. Box 347, FI-00029  
49  
50 HUS, Finland

51  
52  
53  
54 18

55  
56  
57 19 **Corresponding author:**

58  
59  
60 20 Jelena Oulasvirta

1  
2  
3  
4  
5  
6  
7  
8  
9  
10  
11  
12  
13  
14  
15  
16  
17  
18  
19  
20  
21  
22  
23  
24  
25  
26  
27  
28  
29  
30  
31  
32  
33  
34  
35  
36  
37  
38  
39  
40  
41  
42  
43  
44  
45  
46  
47  
48  
49  
50  
51  
52  
53  
54  
55  
56  
57  
58  
59  
60

1

2 **Postal address:** Töölö Hospital, University of Helsinki and Helsinki University Hospital, P.O. Box 266, FI-00029

3 HUS, Finland

4

5 **E-mail:** [jelena.oulasvirta@hus.fi](mailto:jelena.oulasvirta@hus.fi)

6 **Telephone:** +358 50 428 7622

7

8 **Keywords:** emergency medical services, paediatrics, outcome, patient safety, emergency care, COVID-19

9

10 **Word count:** Abstract 253, main text about 2901

Confidential: For Review Only

1  
2  
3 1 **What is already known on this topic**  
4  
5

- 6 2 • Compared to adults, children are less affected by the COVID-19 infection but may be affected by its  
7  
8 3 control measures.  
9  
10 4 • Children may experience collateral damage because of the infection control measures, mainly  
11  
12 5 designed to protect adults.  
13  
14 6 • The pandemic has decreased paediatric emergency department (ED) visits, but it is not clear how or  
15  
16 7 if prehospital care has also been affected.  
17  
18  
19

20 8 **What this study adds**  
21  
22

- 23 9 • The use of prehospital emergency medical services decreased in children after declaration of the  
24  
25 10 state of emergency in Finland.  
26  
27 11 • During the pandemic, ambulance calls for children were more often in the most urgent category  
28  
29 12 and due to trauma. Paradoxically, almost 60% of children were not transported to the ED.  
30  
31 13 • Societal measures targeted to protect adults against the pandemic affected children and their  
32  
33 14 emergency medical care.  
34  
35  
36  
37  
38  
39  
40  
41  
42  
43  
44  
45  
46  
47  
48  
49  
50  
51  
52  
53  
54  
55  
56  
57  
58  
59  
60

1  
2  
3 **1 ABSTRACT**  
4

5  
6 **2 Background**  
7

8  
9 3 Children are less vulnerable to serious forms of the COVID-19 disease. However, concerns have been raised  
10  
11 4 about children being the second victims of the pandemic and its control measures. Therefore, we wanted  
12  
13 5 to study if the pandemic, the infection control measures and their consequences to the society projected to  
14  
15 6 paediatric prehospital emergency medical services (EMS) contacts.  
16  
17

18 **7 Methods**  
19

20  
21 8 We conducted a population-based cohort study concerning all children aged 0-15 years with EMS contacts  
22  
23 9 in the Helsinki University Hospital (HUU) area during 1.3.-31.5.2020 (study period) and equivalent periods  
24  
25 10 in 2017-2019 (control periods). We analysed the demographic characteristics, time of EMS contact, reason  
26  
27 11 for EMS contact, priority of the dispatch, reason for transportation, priority of transportation, if any  
28  
29 12 consultations were made or additional units required, any medication or oxygen or fluids given, if  
30  
31 13 intubation was performed, and whether paramedics took precautions when COVID-19 infection was  
32  
33 14 suspected.  
34  
35  
36  
37

38 **15 Results**  
39

40  
41 16 The number of paediatric EMS contacts decreased by 30.4% from mean of 1794 contacts to 1369 ( $p=0.003$ ).  
42  
43 17 The EMS contacts were more often due to trauma, (+23.7%,  $p<0.05$ ), dispatched in the most urgent  
44  
45 18 category (+139.9%,  $p=0.001$ ), additional help and the mobile intensive care unit (MICU) were more  
46  
47 19 frequently requested (+43.3%,  $p=0.040$  and +46.3%,  $p=0.049$ , respectively). However, EMS contacts  
48  
49 20 resulted less often in ambulance transport (-21.1%,  $p<0.001$ ). Alarming, there were 4 deaths during the  
50  
51 21 study period compared to 0-2 during the control periods.  
52  
53  
54

55 **22 Conclusions**  
56

57  
58 23 The number of EMS contacts decreased during the pandemic. Nevertheless, the children encountered by  
59  
60 24 the EMS were more seriously ill than during the control periods.

## 1 INTRODUCTION

2 Children seem to be less vulnerable to the serious forms of the COVID-19 disease by the new pandemic  
3 coronavirus SARS-CoV-2 than adults (1–3). Still, following the infection control measures and associated  
4 abrupt changes in healthcare delivery, children have not been spared from the health effects of the  
5 pandemic. Consequently, health professionals have expressed concern over children becoming second  
6 victims of the pandemic (4–6).

7 Instructions on social distancing and self-quarantine resulted in a considerable decrease in paediatric  
8 emergency department (ED) visits (4,5). Also, the emergency healthcare itself changed: In EDs and  
9 prehospital emergency medical services (EMS), infection control measures, including the use of personal  
10 protective equipment have slowed patient flows and resulted in modified treatment protocols. On the  
11 other hand, the ubiquitous presence of COVID-19 in news and media may have created a bias in clinicians,  
12 who may be prone to diagnostic errors, suspecting COVID-19 over more common conditions.

13 Decreasing unnecessary paediatric ED visits and ambulance calls has been a priority in paediatric  
14 emergency care already before the pandemic (7–9). However, alarmed by reports stating risks associated  
15 with decreases in paediatric ED visits (4,5) we wanted to study if the pandemic and social distancing  
16 measures were reflected in the amount and features of the EMS contacts with children as well. If these  
17 contacts had indeed substantially decreased, it would be important to analyse whether this change has  
18 taken place at the cost of health risks for children.

## 1           2 3   1   **METHODS**

### 4 5   2   **Study area and population**

6  
7   3   The Helsinki University Hospital (HUH) area in Southern Finland has 1 263 000 inhabitants including 217 000  
8  
9   4   0-15-years-old children (2019) (10) and consists of both urban and suburban regions covering 1 216 km<sup>2</sup>.  
10  
11  
12   5   This study covers all prehospital ambulance responses for children (aged 0-15 years) in the HUH area during  
13  
14   6   the study and control periods.  
15

### 16 17 18   8   **Organisation of emergency medical services and healthcare system**

19  
20  
21   9   Finland has a publicly financed universal healthcare system for all residents. The public healthcare  
22  
23   10   exclusively provides all prehospital emergency medical services. All emergency calls go to the governmental  
24  
25   11   emergency response centre (ERC). A professional ERC operator categorises the leading complaint to form  
26  
27   12   a dispatch code and determines a priority class from A (highest risk) to D (lowest risk) according to a formal  
28  
29   13   protocol (11). In HUH area, all prehospital emergencies are responded to by HUH EMS consisting of 36  
30  
31   14   ambulances and three medical supervisor units staffed by emergency medical technicians, paramedics and  
32  
33   15   two physician-staffed units. An emergency physician can be consulted by phone, or, requested on scene.  
34  
35   16   Not all patients encountered by EMS are transported to hospital by ambulance. After on-scene examination  
36  
37   17   and treatment, the EMS personnel may conclude that patient does not need ambulance transport. In that  
38  
39   18   case they must inform the patient or the caregivers on how to observe and treat the condition and on  
40  
41   19   whether or when to contact healthcare services again. The protocol on the treatment and transport of  
42  
43   20   children for the EMS did not change during the pandemic. Nevertheless, preferring other treatment options  
44  
45   21   over nebulised medication, was advised.  
46  
47  
48  
49

50   22  
51  
52   23   There are two 24/7 paediatric ED units with in-patient care in the area. In addition, smaller units offer  
53  
54   24   primary level healthcare during office hours.  
55

### 56 57   25 58 59   26   **Data collection** 60

1  
2  
3 1 We retrieved all emergency responses concerning children (age 0-15 y) from the ambulance electronic  
4  
5 2 patient record system (Merlot Medi®, CGI Suomi Oy) in HUH area between 1.3.2020 and 31.5.2020 (study  
6  
7 3 period) and equivalent periods for three previous years: 1.3.2017 - 31.5.2017; 1.3.2018 - 31.5.2018;  
8  
9  
10 4 1.3.2019 - 31.5.2019 (control periods). We chose control periods to cover three previous years and the  
11  
12 5 same months in order to be able to account for any potential seasonal variation. The pandemic declaration  
13  
14 6 by World Health Organisation (WHO) on 11 March, the Finnish Government announcement of the state of  
15  
16 7 emergency in Finland on 16 March, and the reopening of schools on 14 May were included in the study  
17  
18 8 period. We analysed the time of contact, reason for contact, dispatch priority, reason for transportation,  
19  
20 9 priority of transportation, age, sex, native language, whether the patient received medications, oxygen,  
21  
22 10 fluids or was intubated, whether a physician was consulted or requested on-scene or additional units  
23  
24 11 required, and whether COVID-19 was suspected. We investigated eventual laboratory diagnostics for  
25  
26 12 respiratory viruses (including SARS-CoV-2) from the Helsinki University Hospital in-hospital patient record  
27  
28 13 system (Uranus®, CGI Suomi Oy and Apotti®, Epic Systems Corporation). A flow-chart of EMS contacts in  
29  
30 14 2020 and possible suspicion of COVID-19 infection is presented in Supplementary Material 2.  
31  
32  
33  
34  
35  
36

### 37 16 **Statistical analysis**

38  
39 17 Because this is a retrospective study concerning a multidimensional and rapidly progressing medico-societal  
40  
41 18 phenomenon, the possible confounders are multiple and their effects difficult to predict. As we did not aim  
42  
43 19 at establishing causalities between the control measures and EMS contacts, but at noticing possible  
44  
45 20 indicators of the effects of the pandemic on the health and welfare of children, we chose univariate  
46  
47 21 analysis for the primary statistical method, since it gives the clinically most relevant answers to our study  
48  
49 22 questions. Estimates and proportions are shown using medians and interquartile ranges (IQR) and number  
50  
51 23 of events are shown using counts and percentages. To compare the change in EMS contacts during the  
52  
53 24 study period to that of control periods, we used the Mann-Whitney U test or Wilcoxon signed-rank test  
54  
55 25 depending on whether comparisons were made between all the observations or between the weeks of  
56  
57 26 2020 and the previous years. The analyses were performed using R 3.6.3 (12) and the visualisations using  
58  
59  
60



1  
2  
3 1 ggplot2-package (13). We used 0.05 as the level of significance. As the infection control measures changed  
4  
5 2 during the study period, we used line plots with date as the X-axis to evaluate the eventual changes in our  
6  
7 3 parameters.  
8  
9  
10 4

11  
12 5 This study is reported in compliance with the Strengthening the Reporting of Observational Studies in  
13  
14 6 Epidemiology (STROBE) checklist for cohort studies (Supplementary Material 3).  
15  
16 7

### 18 8 **Ethical aspects and Patient and Public Involvement statement**

19  
20  
21 9 This is a register-based study approved by the Institutional Review Board of Helsinki University Hospital  
22  
23 10 (§24/2020). No public involvement was planned for this study, as the COVID-19 pandemic advanced  
24  
25 11 rapidly.  
26  
27 12

## 1 RESULTS

2 There were 28 680 prehospital EMS contacts during the study period, of which 1368 (4.8%) concerned  
 3 children. This comprised a reduction of paediatric EMS contacts by 23.7% compared to the mean of 1794  
 4 contacts in control periods (Figure 1). There was no statistically significant variation within the control  
 5 periods (Supplementary Material 1, Supplementary Table 2). Patients were younger: 5.3 years compared to  
 6 6.3 years ( $p<0.001$ ) and there were proportionally less children speaking one of the national languages  
 7 (Finnish or Swedish) as native language: 7.8% ( $p=0.003$ ) (Figure 2). The sex distribution was equal in both  
 8 periods (males 54.0% vs. 55.1%).

9  
 10 The changes in the characteristics of EMS dispatch and transportation codes are described in Table 1. The  
 11 proportion of the highest priority A dispatch code rose by 139.9% ( $p=0.001$ ). The absolute number of  
 12 trauma patients decreased by 11.9% ( $p<0.02$ ). However, their proportion increased by 23.7% ( $p<0.05$ ). The  
 13 proportion of non-transported patients increased by 21.1% ( $p<0.001$ ) (Table 1, Figure 3). (Table 1 and  
 14 Figure 3 here)

15  
 16 Additional help and the mobile intensive care unit (MICU) were more frequently requested on-scene  
 17 (+43.3%,  $p=0.040$  and +46.3%,  $p=0.049$ , respectively). Less treatments were performed in 2020 compared to  
 18 the control periods: establishing an intravenous access decreased in proportion by 32.5% ( $p=0.008$ ) and  
 19 administering medications by 35.3% ( $p<0.02$ ) (Table 2). (Table 2 here)

20  
 21 Four patients were dead on arrival of the EMS or died on-scene during the study period, as compared to 0 -  
 22 2 during the control periods (Table 3). (Table 3 here)

23  
 24 **Table 3.** Mortality presented by year during equivalent periods of 1.3.-31.5.

|                                 | 2017 | 2018 | 2019 | 2020 | P-value |
|---------------------------------|------|------|------|------|---------|
| All paediatric EMS contacts (n) | 1722 | 1801 | 1857 | 1364 |         |
| Dead on arrival or on-scene (n) | 2    | 0    | 1    | 4    | 0,060   |

25 EMS = Emergency Medical Services

1  
2  
3  
4  
5  
6  
7  
8  
9  
10  
11  
12  
13  
14  
15  
16  
17  
18  
19  
20  
21  
22  
23  
24  
25  
26  
27  
28  
29  
30  
31  
32  
33  
34  
35  
36  
37  
38  
39  
40  
41  
42  
43  
44  
45  
46  
47  
48  
49  
50  
51  
52  
53  
54  
55  
56  
57  
58  
59  
60

1  
2  
3 1  
4  
5 2 Of the 1368 children, COVID-19 infection was suspected in 103. Of these, 4 were previously known to be  
6  
7 3 positive for SARS-CoV-2 and there were 2 new infections. However, 41 of the 1261 children not suspected  
8  
9 4 as having COVID-19 by the EMS were tested for COVID-19 infection at the ED, with only 1 positive result.

Confidential: For Review Only

## 1 DISCUSSION

2 During a local epidemic peak of the COVID-19 pandemic, prehospital emergency care delivered to children  
3 decreased and its characteristics changed markedly. Emergency calls for children were more often  
4 categorised as urgent and an emergency medical physician or other additional help were more often  
5 needed. Concomitantly, the number of prehospital paediatric deaths during the pandemic was noteworthy.  
6 Therefore, our results suggest that the children encountered by the EMS during the pandemic were more  
7 seriously ill than before the pandemic. Paradoxically, the EMS contacts more likely led to not transporting  
8 the child to the ED (Figure 3).

9  
10 Finland has not experienced high COVID-19 infection rates in the population so far. The highest demand for  
11 hospital beds and intensive care was experienced mid-April (14). Thus, the changes we noticed in the  
12 emergency healthcare to children were neither due to SARS CoV-2, nor to an overwhelming of the  
13 emergency healthcare system. Instead, they represent the changes in healthcare functionality, and in the  
14 behaviour of families with children.

15  
16 We expected the decrease in the number of EMS contacts for children based on international reports about  
17 substantial decreases in the number of paediatric ED visits during the pandemic (15,16). Our figures were  
18 also congruent with those from the paediatric EDs in the area, which saw a 45% decrease in the number of  
19 visits after the beginning of the infection control measures, according to the hospital statistical data. The  
20 EMS contacts with children started to decrease immediately after the declaration of state of emergency,  
21 suggesting that the decrease was more societal than medical in nature.

22  
23 The decrease in EMS contacts was probably due to several factors, which may represent both positive  
24 changes in the behaviour of caregivers, but also cause unnecessary risks to children. A successful public

1  
2  
3 1 guidance during the state of emergency, encouraging parents to treat mild symptoms at home and avoid  
4  
5 2 overcrowding EDs, could have eliminated some medically unjustifiable EMS contacts (9,17). In addition,  
6  
7 3 infection control measures could have decreased the occurrence of acute infections in children and, hence,  
8  
9 4 the occurrence of febrile seizures and dyspnoea, which are leading causes for paediatric EMS calls under  
10  
11 5 normal circumstances (18). Still, especially the peak in the number of children who died on-  
12  
13 6 scene warrants careful examination of the EMS contacts during the pandemic. Even if the increase  
14  
15 7 in deaths is a preliminary finding and as such may be due to coincidence, we cannot confidently state that  
16  
17 8 the decrease in EMS contacts was a positive proceeding. The ubiquitous presence of COVID-19 in media,  
18  
19 9 reports about overcrowded EDs and a concomitant public guidance stating that all unnecessary contacts  
20  
21 10 should be avoided, could have led to caregivers delaying ED visits and emergency calls even when medical  
22  
23 11 attention would urgently have been needed. Noticeably, a recent report from adult EMS contacts in the UK  
24  
25 12 states that the pandemic did not cause reluctance to call an ambulance in case of a real emergency, such as  
26  
27 13 stroke or heart attack (19).  
28  
29  
30  
31  
32  
33  
34  
35

36 15 Our results suggest that the children encountered by the EMS during the pandemic were more seriously ill  
37  
38 16 than during the control periods. Although the total number of EMS contacts decreased, the number of the  
39  
40 17 most urgent EMS calls with priority class A increased. Simultaneously, the proportions of contacts requiring  
41  
42 18 an emergency medical physician or other additional help increased. There were no changes in the EMS  
43  
44 19 protocols that could account for such finding. The high number of paediatric out-of-hospital deaths may  
45  
46 20 also be related to this notice.  
47  
48  
49  
50  
51  
52

53 22 Even though children encountered by the EMS during the pandemic seem to have been more seriously ill  
54  
55 23 than before, the contacts more often led to not transporting the child to the ED. The increase in the  
56  
57 24 proportion of EMS calls in which the patient was not transported in an ambulance (“non-transport”) is  
58  
59 25 interesting, as in our system the non-transport rates were already high before pandemic (18,20). This  
60

1  
2  
3 1 finding is also paradoxical considering that non-urgent or non-medical complaints did not seem  
4  
5 2 overexpressed during the study period. The increased tendency not to transport a child by ambulance may  
6  
7 3 reflect the practical difficulties imposed by the infection control measures during the pandemic, such as a  
8  
9 4 time-consuming obligation to thoroughly clean the ambulance after any transport. Also, non-transport  
10  
11 5 decisions are not solely based on medical decision-making, but social and logistic issues are considered as  
12  
13 6 well. In our urban study area other transport possibilities than ambulance, are easily available. During the  
14  
15 7 pandemic, caregivers for older children were not allowed to escort the child in an ambulance. Thus, it is  
16  
17 8 likely that if the ambulance transport was medically not necessary and if the caregiver needed to use  
18  
19 9 another means of transport anyway, the child may have preferred the ride with the caregiver. In addition,  
20  
21 10 similarly to laypersons, the EMS personnel were also exposed to media warning about overcrowded EDs  
22  
23 11 and reporting about overwhelmed healthcare systems. Even without changes in protocols, the EMS  
24  
25 12 personnel may have felt a need to ascertain that a maximal number of units are available at all times for  
26  
27 13 urgent cases, and, opted not to transport when there was no explicit need for ambulance transportation.  
28  
29  
30  
31  
32  
33  
34  
35

36 15 We observed a decrease in the absolute rate of traumas, but non-traumatic emergencies decreased even  
37  
38 16 more. This is interesting, as we hypothesised that the decrease in EMS dispatches during the pandemic  
39  
40 17 would have been most pronounced for traumas. After all, due to social distancing, children had less school  
41  
42 18 and sport activities and transports in motor vehicles. Under normal circumstances, these factors are major  
43  
44 19 contributors for paediatric traumas (21). On the other hand, even if schools and activities were closed,  
45  
46 20 playgrounds and other public outdoor areas remained open; thus, offering more unsupervised outside  
47  
48 21 playing time. These changes from normal routines may have contributed to unpredicted new risks for  
49  
50 22 traumas in children.  
51  
52  
53  
54  
55  
56

57 24 We found that the number of EMS calls for children speaking other language than the national languages  
58  
59 25 (Finnish or Swedish) decreased similarly to other contacts but with a delay (Figure 2). In Finland, native

1  
2  
3  
4  
5  
6  
7  
8  
9  
10  
11  
12  
13  
14  
15  
16  
17  
18  
19  
20  
21  
22  
23  
24  
25  
26  
27  
28  
29  
30  
31  
32  
33  
34  
35  
36  
37  
38  
39  
40  
41  
42  
43  
44  
45  
46  
47  
48  
49  
50  
51  
52  
53  
54  
55  
56  
57  
58  
59  
60

1 language can be used as a proxy for recent immigrant background. Interestingly, several reports have  
2 addressed the vulnerability of ethnic minority groups to COVID-19 (22,23). Our results suggest that  
3 language and immigrant background may play a role: the information took more time to reach  
4 subpopulations with deficiencies in language skills and poor knowledge of the healthcare system.  
5 Consequently, in possible new pandemic waves, more attention should be paid to efficiently spreading  
6 accurate information in different languages and formats.

7  
8 To evaluate if changes were specifically encountered by families with children, we also compared our  
9 findings to those in the total HUH population. In our area, EMS calls for adults also decreased by 11.1 % ( $p =$   
10 0.004) during the pandemic; but, in contrast to children, the absolute number of their most urgent contacts  
11 also decreased by 17.1 % ( $p = 0.004$ ), and there was no increase in the on-scene mortality. In addition, the  
12 decrease in adult EMS contacts occurred already before the declaration of the state of emergency. The  
13 pattern for children is clearly different, which strengthens the concern raised by recent reports suggesting  
14 that children may have had to bear the burden of the restrictions of the COVID-19 pandemic differently to  
15 adults – even to the extent of becoming the “collateral damage” of the pandemic (6). Taken together, these  
16 findings suggest that in adults, behavioural changes (i.e., decrease in risk behaviours following social  
17 distancing, reluctance to contact medical care etc.) were responsible for most of the decrease in EMS  
18 contacts; and that, in contrast to children, the protective measures were truly protective for adults,  
19 decreasing the occurrence of severe acute illnesses and injuries. It remains to be solved how, in future  
20 pandemics, children could be protected from the negative impacts of measures designed to protect adults.

21  
22 To protect the EMS and ED personnel from infections, and to optimise the use of critical resources, it would  
23 be crucial to be able to recognise children with probable or possible COVID-19. We found that calibration  
24 still needs to be done – in about half of the patients where EMS personnel suspected COVID-19, no COVID-  
25 19 tests were performed at the ED. On the other hand, only 41 of the 1261 patients in whom EMS

1  
2  
3 1 personnel did not suspect COVID-19 infections, were tested for COVID-19 with one positive result. This  
4  
5 2 implies that more explicit instructions for EMS personnel are needed (24).  
6  
7  
8  
9

10  
11 4 Our study has several limitations. First, it is a single-centre study. Second, because of the rapid advance of  
12  
13 5 the COVID-19 pandemic, this study is retrospective. We tried to address the lack of historic references and  
14  
15 6 the question about possible pre-existing seasonal variation by comparing the data to equivalent periods of  
16  
17 7 three previous years. Finally, mortality is such a rare event that no statistical conclusions can be drawn  
18  
19 8 based on our data. However, we believe that this finding needs to be disclosed.  
20  
21  
22  
23  
24  
25

26 10 The pandemic created exceptional circumstances with rapid changes in the behaviour of families with  
27  
28 11 children and the functionality of emergency healthcare. During recent pandemics, e.g. the H1N1 influenza  
29  
30 12 in 2009, school closure and social distancing measures were never extended to children in a similar way  
31  
32 13 (25). In our area, the setting was particularly interesting, as the prevalence of COVID-19 in the population  
33  
34 14 remained low throughout the epidemic (14). Thus, our results may be generalisable to other similar  
35  
36 15 situations of unexpected quick changes in the healthcare.  
37  
38  
39  
40 16  
41  
42

## 43 17 **CONCLUSIONS**

44  
45  
46 18 The total number of contacts decreased rapidly during the COVID-19 pandemic. Also, the children  
47  
48 19 encountered by the EMS were more seriously ill, and we registered a noteworthy number of prehospital  
49  
50 20 deaths compared to the control periods. Our results highlight the need to consider secondary effects of the  
51  
52 21 pandemic and the control measures also on other populations than those originally targeted.  
53  
54  
55  
56  
57  
58  
59  
60



1  
2  
3 1 **A funding statement:**  
4

5  
6 2 This study received a grant from The Finnish Medical Society Duodecim. The Society had no role in the  
7  
8 3 study design, collection, analysis or interpretation of data; in the writing of the manuscript, or in the  
9  
10 4 decision to submit the manuscript for publication.  
11

12  
13 5  
14  
15 6 **A competing interests statement:**  
16

17 7 Authors do not have competing interests.  
18  
19 8  
20

21  
22 9 **Contributions:**  
23

24 10 JO, HS, MaK, HHR conceptualised and designed the study, carried out the initial analyses, drafted the initial  
25  
26 11 manuscript, and reviewed and revised the manuscript. JO, HS, HHR and JP collected the data. JP and MiK  
27  
28 12 participated in the design of the study, reviewed the initial data collection and initial analyses, and critically  
29  
30 13 reviewed and revised the manuscript. ML designed the data analysis instruments, coordinated and  
31  
32 14 supervised data analysis, and critically reviewed the manuscript. All authors approved the final manuscript  
33  
34 15 as submitted and agreed to be accountable for all aspects of the work.  
35  
36  
37 16  
38

39 17 **Any checklist and flow diagram for the appropriate reporting statement,**  
40

41 18 STROBE, please see Supplementary Materials.  
42  
43  
44 19  
45

46 20 **Patient consent form:**  
47

48 21 Not applicable.  
49  
50  
51 22

52  
53 23 **Data availability statement:**  
54

55 24 Data are available upon reasonable request.  
56  
57 25  
58  
59 26  
60

1  
2  
3 **1 FIGURE LEGENDS:**  
4

5 **2 Figure 1:** Basic information on paediatric EMS contacts in 2020 compared to equivalent periods in 2017-  
6  
7 2019.  
8

9  
10 4 a) A number of weekly EMS contacts  
11

12 5 b) A timeline of the course of the first pandemic wave and number of weekly EMS contacts.  
13

- 14 6 1. World Health Organization declared the pandemic, 11 March 2020
- 15  
16 7 2. Public social gatherings were limited to a maximum of 500 participants, 15 March 2020
- 17  
18 8 3. The government announced the state of emergency, 16 March 2020
- 19  
20  
21 9 4. National restrictions and social distancing launched. Schools closed, 18 March 2020
- 22  
23 10 5. Launching strict national border control, 19 March 2020
- 24  
25 11 6. Isolation of Southern Finland started, 28, March 2020
- 26  
27  
28 12 7. Isolation of Southern Finland ended, 15 April 2020
- 29  
30 13 8. Schools reopened, 14 May 2020

31  
32 14 EMS = Emergency Medical Services  
33  
34  
35 15

36 **16 Figure 2:** A timeline of the course of the first pandemic wave and proportion of EMS contacts with other-  
37  
38 language-speakers.  
39 17

- 40  
41 18 1. World Health Organization declared pandemic, 11 March 2020
- 42  
43 19 2. Public social gatherings were limited to a maximum of 500 participants, 15 March 2020
- 44  
45 20 3. The government announced the state of emergency, 16 March 2020
- 46  
47  
48 21 4. National restrictions and social distancing launched. Schools closed, 18 March 2020
- 49  
50 22 5. Launching strict national border control, 19 March 2020
- 51  
52 23 6. Isolation of Southern Finland started, 28, March 2020
- 53  
54 24 7. Isolation of Southern Finland ended, 15 April 2020
- 55  
56 25 8. Schools reopened, 14 May 2020

57 26 EMS = Emergency Medical Services  
58  
59  
60

1  
2  
3  
4  
5  
6  
7  
8  
9  
10  
11  
12  
13  
14  
15  
16  
17  
18  
19  
20  
21  
22  
23  
24  
25  
26  
27  
28  
29  
30  
31  
32  
33  
34  
35  
36  
37  
38  
39  
40  
41  
42  
43  
44  
45  
46  
47  
48  
49  
50  
51  
52  
53  
54  
55  
56  
57  
58  
59  
60

1

2 **Figure 3:** A timeline of the course of the first pandemic wave and proportion of non-transported patients

3 1. World Health Organization declared pandemic, 11 March 2020

4 2. Public social gatherings were limited to a maximum of 500 participants, 15 March 2020

5 3. The government announced the state of emergency, 16 March 2020

6 4. National restrictions and social distancing launched. Schools closed, 18 March 2020

7 5. Launching strict national border control, 19 March 2020

8 6. Isolation of Southern Finland started, 28, March 2020

9 7. Isolation of Southern Finland ended, 15 April 2020

10 8. Schools reopened, 14 May 2020

11 EMS = Emergency Medical Services

12

13 **ORCID ID**14 Jelena Oulasvirta <https://orcid.org/0000-0001-6750-4615>

15

1  
2  
3 **1 REFERENCES:**  
4  
5

- 6 2 1. Lu X, Zhang L, Du H, et al. SARS-CoV-2 Infection in Children. *N Engl J Med*. 2020 Apr  
7  
8 3 23;382(17):1663–5.
- 10  
11 4 2. Castagnoli R, Votto M, Licari A, et al. Severe Acute Respiratory Syndrome Coronavirus 2 (SARS-CoV-  
12  
13 5 2) Infection in Children and Adolescents. *JAMA Pediatr*. 2020 Apr 22;
- 16 6 3. Parri N, Lenge M, Buonsenso D. Children with Covid-19 in Pediatric Emergency Departments in Italy.  
17  
18 7 *N Engl J Med*. 2020 May 1;NEJMc2007617.
- 21 8 4. Lazzerini M, Barbi E, Apicella A, et al. Delayed access or provision of care in Italy resulting from fear  
22  
23 9 of COVID-19. *Lancet Child Adolesc Heal*. 2020 May 1;4(5):e10–1.
- 26 10 5. Green P. Risks to children and young people during covid-19 pandemic. *BMJ*. 2020 Apr  
27  
28 11 28;369:m1669.
- 31 12 6. Crawley E, Loades M, Feder G, et al. Wider collateral damage to children in the UK because of the  
32  
33 13 social distancing measures designed to reduce the impact of COVID-19 in adults. *BMJ Paediatr Open*.  
34  
35 14 2020 May 4;4(1):e000701.
- 39 15 7. Poku BA, Hemingway P. Reducing repeat paediatric emergency department attendance for non-  
40  
41 16 urgent care: a systematic review of the effectiveness of interventions. *Emerg Med J*. 2019 Jun  
42  
43 17 21;36(7):emermed-2018-207536.
- 46 18 8. Pearson C, Kim DS, Mika VH, et al. Emergency department visits in patients with low acuity  
47  
48 19 conditions: Factors associated with resource utilization. *Am J Emerg Med*. 2018 Aug 13;36(8):1327–  
49  
50 20 31.
- 54 21 9. Farion KJ, Wright M, Zemek R, et al. Understanding Low-Acuity Visits to the Pediatric Emergency  
55  
56 22 Department. Eckle T, editor. *PLoS One*. 2015 Jun 17;10(6):e0128927.
- 59 23 10. Finnish Official Statistics - Suomen virallinen tilasto (SVT): Väestörakenne [web page]. ISSN=1797-  
60

- 1  
2  
3 1 5379. Helsinki: Tilastokeskus [accessed: 16.6.2020]. <http://www.stat.fi/til/vaerak/index.html>. 2019.  
4  
5  
6 2 11. Hoikka M, Länkimäki S, Silfvast T, et al. Medical priority dispatch codes—comparison with National  
7  
8 3 Early Warning Score. *Scand J Trauma Resusc Emerg Med*. 2016 Dec 3;24(1):142.  
9  
10  
11 4 12. R Core Team (2020). R: A language and environment for statistical computing. R Foundation for  
12  
13 5 Statistical Computing, Vienna, Austria. 2020.  
14  
15  
16 6 13. Wickham H. *ggplot2: Elegant Graphics for Data Analysis*. Cham: Springer International Publishing;  
17  
18 7 2016. (Use R!).  
19  
20  
21 8 14. Situation update on coronavirus - Infectious diseases and vaccinations - Finnish Institute for Health  
22  
23 9 and Welfare [Internet]. [cited 2020 Jul 12]. Available from: [https://thl.fi/en/web/infectious-diseases-](https://thl.fi/en/web/infectious-diseases-and-vaccinations/what-s-new/coronavirus-covid-19-latest-updates/situation-update-on-coronavirus)  
24  
25 10 [and-vaccinations/what-s-new/coronavirus-covid-19-latest-updates/situation-update-on-coronavirus](https://thl.fi/en/web/infectious-diseases-and-vaccinations/what-s-new/coronavirus-covid-19-latest-updates/situation-update-on-coronavirus)  
26  
27  
28  
29 11 15. Scaramuzza A, Tagliaferri F, Bonetti L, et al. Changing admission patterns in paediatric emergency  
30  
31 12 departments during the COVID-19 pandemic. *Arch Dis Child*. 2020 Jul;105(7):704.2-706.  
32  
33  
34 13 16. Isba R, Edge R, Jenner R, et al. Where have all the children gone? Decreases in paediatric emergency  
35  
36 14 department attendances at the start of the COVID-19 pandemic of 2020. *Arch Dis Child*.  
37  
38 15 2020;105(7):2020.  
39  
40  
41 16 17. Morgan SR, Chang AM, Alqatari M, et al. Non-Emergency Department Interventions to Reduce ED  
42  
43 17 Utilization: A Systematic Review. Zehtabchi S, editor. *Acad Emerg Med*. 2013 Oct;20(10):969–85.  
44  
45  
46 18 18. Harve H, Salmi H, Rahiala E, et al. Out-of-hospital paediatric emergencies: a prospective, population-  
47  
48 19 based study. *Acta Anaesthesiol Scand*. 2016 Mar;60(3):360–9.  
49  
50  
51 20 19. Holmes JL, Brake S, Docherty M, et al. Emergency ambulance services for heart attack and stroke  
52  
53 21 during UK's COVID-19 lockdown. *Lancet*. 2020 May;395(10237):e93–4.  
54  
55  
56 22 20. Oulasvirta J, Salmi H, Kuisma M, et al. Outcomes in children evaluated but not transported by  
57  
58 23 ambulance personnel: retrospective cohort study. *BMJ Paediatr Open*. 2019 Oct 23;3(1):e000523.  
59  
60

- 1  
2  
3 1 21. Listo I, Salmi H, Hästbacka M, et al. Pediatric traumas and neighborhood socioeconomic  
4  
5 2 characteristics: A population based study. *J Pediatr Surg*. 2020 Jun;  
6  
7  
8 3 22. Williamson EJ, Walker AJ, Bhaskaran K, et al. OpenSAFELY: factors associated with COVID-19 death  
9  
10 4 in 17 million patients. *Nature*. 2020 Jul 8;  
11  
12  
13 5 23. Pan D, Sze S, Minhas JS, et al. The impact of ethnicity on clinical outcomes in COVID-19: A systematic  
14  
15 6 review. *EClinicalMedicine*. 2020 Jun;23:100404.  
16  
17  
18 7 24. Lemoine S, Chabernaude J-L, Travers S, et al. COVID-19 in pediatric patients: What the prehospital  
19  
20 8 teams need to know. *Arch Pédiatrie*. 2020 Jul;27(5):281–2.  
21  
22  
23 9 25. Jhaveri R. Echoes of 2009 H1N1 Influenza Pandemic in the COVID Pandemic. *Clin Ther*. 2020  
24  
25 10 May;42(5):736–40.  
26  
27  
28  
29 11  
30  
31  
32  
33  
34  
35  
36  
37  
38  
39  
40  
41  
42  
43  
44  
45  
46  
47  
48  
49  
50  
51  
52  
53  
54  
55  
56  
57  
58  
59  
60

1 **Table 1.** Change in the dispatch and transportation codes.

|                            |                         | Mean 2017-2019        | 2020                  | change                   | P-value          |
|----------------------------|-------------------------|-----------------------|-----------------------|--------------------------|------------------|
| All EMS contacts           | all n (%)               | 1794.3 (100.0%)       | 1368 (100.0%)         |                          |                  |
|                            | n per week median (IQR) | 137.7 (130.7 - 142.0) | 91.0 (86.0 - 132.0)   | -30.4% (-36.6% - -12.8%) | <b>0,003</b>     |
| Dispatch priority A*       | all n (%)               | 55.3 (3.1%)           | 90 (6.6%)             |                          |                  |
|                            | n per week median (IQR) | 3.7 (3.3 - 3.7)       | 8.0 (7.0 - 8.0)       | 90.9% (36.4% - 140.0%)   | <b>0,031</b>     |
|                            | % per week median (IQR) | 2.7% (2.4% - 2.8%)    | 6.1% (5.7% - 8.4%)    | 139.9% (116.7 - 175.9%)  | <b>0,001</b>     |
| Dispatch priority B*       | all n (%)               | 690.7 (38.5%)         | 478 (34.9%)           |                          |                  |
|                            | n per week median (IQR) | 51.7 (50.3 - 55.7)    | 37.0 (30.0 - 43.0)    | -29.0% (-42.3% - -20.7%) | <b>0,002</b>     |
|                            | % per week median (IQR) | 38.2% (36.7% - 40.5%) | 36.1% (31.5% - 38.1%) | -8.7% (-15.9 - -2.3%)    | <b>0,027</b>     |
| Dispatch priority C*       | all n (%)               | 932.7 (52.0%)         | 658 (48.1%)           |                          |                  |
|                            | n per week median (IQR) | 71.3 (67.3 - 74.0)    | 44.0 (43.0 - 57.0)    | -34.7% (-41.8% - -23.3%) | <b>0,001</b>     |
|                            | % per week median (IQR) | 52.1% (50.5% - 53.7%) | 49.4% (45.7% - 51.4%) | -6.7% (-9.1 - -4.1%)     | <b>0,048</b>     |
| Dispatch priority D*       | all n (%)               | 115.7 (6.4%)          | 143 (10.4%)           |                          |                  |
|                            | n per week median (IQR) | 8.3 (7.3 - 11.0)      | 10.0 (8.0 - 12.0)     | 12.5% (-11.8% - 60.0%)   | 0,235            |
|                            | % per week median (IQR) | 6.5% (5.2% - 7.9%)    | 9.5% (8.1% - 11.4%)   | 65.0% (38.9 - 83.6%)     | <b>0,001</b>     |
| Transported patients       | all n (%)               | 927.3 (51.7%)         | 578 (42.3%)           |                          |                  |
|                            | n per week median (IQR) | 73.0 (67.0 - 74.7)    | 36.0 (34.0 - 54.0)    | -49.1% (-52.0% - -27.7%) | <b>0,002</b>     |
|                            | % per week median (IQR) | 52.2% (51.4% - 52.9%) | 41.9% (39.1% - 44.8%) | -19.5% (-27.0 - -13.4%)  | <b>&lt;0,001</b> |
| Transportation priority A* | all n (%)               | 12.3 (0.7%)           | 6 (0.4%)              |                          |                  |
|                            | n per week median (IQR) | 1.0 (0.8 - 1.0)       | 1.0 (1.0 - 1.0)       | 50.0% (0.0% - 50.0%)     | 0,174            |
|                            | % per week median (IQR) | 0.7% (0.5% - 0.8%)    | 1.2% (0.9% - 1.2%)    | 107.2% (52.4 - 381.5%)   | <b>0,031</b>     |
| Transportation priority B* | all n (%)               | 92.3 (5.1%)           | 62 (4.5%)             |                          |                  |
|                            | n per week median (IQR) | 7.0 (5.3 - 8.0)       | 5.0 (3.0 - 5.0)       | -34.8% (-51.6% - -28.6%) | <b>0,004</b>     |
|                            | % per week median (IQR) | 5.4% (4.4% - 5.6%)    | 5.0% (3.5% - 5.7%)    | -15.0% (-31.8 - 4.0%)    | 0,168            |
| Transportation priority C* | all n (%)               | 602.0 (33.6%)         | 398 (29.2%)           |                          |                  |
|                            | n per week median (IQR) | 45.3 (43.0 - 48.3)    | 25.0 (22.0 - 41.0)    | -40.0% (-48.4% - -11.0%) | <b>&lt;0,001</b> |
|                            | % per week median (IQR) | 33.2% (31.9% - 34.5%) | 29.1% (25.6% - 31.2%) | -8.8% (-24.2 - -2.0%)    | <b>0,005</b>     |
| Transportation priority D* | all n (%)               | 220.3 (12.3%)         | 113 (8.3%)            |                          |                  |
|                            | n per week median (IQR) | 16.3 (15.0 - 18.0)    | 7.0 (6.0 - 9.0)       | -60.9% (-63.3% - -45.0%) | <b>0,002</b>     |
|                            | % per week median (IQR) | 11.8% (11.6% - 13.0%) | 7.4% (6.6% - 8.6%)    | -37.7% (-46.2 - -27.2%)  | <b>0,001</b>     |
| Trauma patients            | all n (%)               | 606.0 (33.8%)         | 504 (36.8%)           |                          |                  |
|                            | n per week median (IQR) | 45.3 (39.0 - 51.3)    | 36.0 (31.0 - 41.0)    | -11.9% (-24.5% - -9.6%)  | <b>0,011</b>     |
|                            | % per week median (IQR) | 32.7% (29.6% - 37.1%) | 39.0% (33.3% - 41.7%) | 23.7% (-7.1 - 28.1%)     | <b>0,048</b>     |
| Non-transported patients   | all n (%)               | 866.0 (48.3%)         | 786 (57.6%)           |                          |                  |
|                            | n per week median (IQR) | 66.3 (64.0 - 68.3)    | 56.0 (50.0 - 68.0)    | -7.8% (-26.8% - 0.0%)    | <b>0,108</b>     |
|                            | % per week median (IQR) | 47.8% (47.1% - 48.7%) | 58.1% (55.2% - 60.9%) | 21.1% (15.0 - 28.4%)     | <b>&lt;0,001</b> |

2 \* the priority class from A to D refers to the urgency of the dispatch /transportation and /or to the risk of  
3 the symptom to a patient – A being the contact with highest urgency and risk and D the lowest urgency and  
4 risk

5 EMS = Emergency Medical Services

6 IQR = Interquartile Range

7

**Table 2.** Change in the additional units requested and interventions performed on-scene

|                                        |                         | Mean 2017-2019        | 2020                  | change                   | P-value      |
|----------------------------------------|-------------------------|-----------------------|-----------------------|--------------------------|--------------|
| additional help requested              | all n (%)               | 86.7 (4.8%)           | 94 (6.9%)             |                          |              |
|                                        | n per week median (IQR) | 6.3 (5.3 - 7.7)       | 7.0 (5.0 - 9.0)       | 23.5% (-29.4% - 31.3%)   | 0,529        |
|                                        | % per week median (IQR) | 4.6% (4.0% - 5.6%)    | 6.8% (4.5% - 8.5%)    | 43.3% (0.7 - 117.7%)     | <b>0,040</b> |
| MICU on-scene                          | all n (%)               | 26.0 (1.4%)           | 24 (1.8%)             |                          |              |
|                                        | n per week median (IQR) | 1.7 (1.3 - 2.3)       | 2.0 (2.0 - 2.8)       | 0.0% (-13.2% - 50.0%)    | 0,435        |
|                                        | % per week median (IQR) | 1.3% (0.9% - 1.7%)    | 2.3% (1.4% - 2.5%)    | 46.3% (-1.4 - 100.5%)    | <b>0,049</b> |
| emergency physician consulted by phone | all n (%)               | 291.3 (16.2%)         | 236 (17.2%)           |                          |              |
|                                        | n per week median (IQR) | 21.7 (21.3 - 23.0)    | 18.0 (15.0 - 20.0)    | -28.4% (-36.3% - -1.7%)  | <b>0,023</b> |
|                                        | % per week median (IQR) | 16.1% (15.3% - 17.1%) | 17.6% (15.6% - 18.1%) | 2.7% (-4.6 - 19.6%)      | 0,588        |
| any measurements done on-scene         | all n (%)               | 1693.0 (94.4%)        | 1280 (93.5%)          |                          |              |
|                                        | n per week median (IQR) | 129.0 (124.0 - 134.3) | 88.0 (78.0 - 124.0)   | -29.0% (-37.6% - -12.3%) | <b>0,001</b> |
|                                        | % per week median (IQR) | 94.6% (94.0% - 94.9%) | 93.9% (91.9% - 95.3%) | -0.0% (-2.2 - 1.6%)      | 0,455        |
| intubation*                            | all n (%)               | 2.0 (0.1%)            | 3 (0.2%)              |                          |              |
|                                        | n per week median (IQR) | 0.3 (0.3 - 0.3)       | 1.5 (1.2 - 1.8)       |                          |              |
|                                        | % per week median (IQR) | 0.2% (0.1% - 0.2%)    | 1.3% (1.2% - 1.3%)    |                          |              |
| supplementary oxygen given             | all n (%)               | 41.7 (2.3%)           | 16 (1.2%)             |                          |              |
|                                        | n per week median (IQR) | 3.0 (2.3 - 3.7)       | 2.0 (1.0 - 2.2)       | -39.4% (-51.8% - 12.5%)  | 0,306        |
|                                        | % per week median (IQR) | 1.9% (1.7% - 2.5%)    | 1.5% (1.2% - 2.4%)    | -19.3% (-33.8 - 17.2%)   | 0,742        |
| intravenous connection established     | all n (%)               | 133.3 (7.4%)          | 65 (4.7%)             |                          |              |
|                                        | n per week median (IQR) | 10.7 (8.3 - 12.3)     | 5.0 (3.0 - 7.0)       | -52.6% (-70.7% - -30.8%) | <b>0,003</b> |
|                                        | % per week median (IQR) | 7.6% (5.9% - 9.0%)    | 4.4% (2.9% - 5.8%)    | -32.5% (-56.8 - -24.9%)  | <b>0,008</b> |
| any medication given                   | all n (%)               | 195.0 (10.9%)         | 111 (8.1%)            |                          |              |
|                                        | n per week median (IQR) | 14.3 (12.3 - 15.3)    | 7.0 (6.0 - 9.0)       | -44.7% (-63.6% - -37.9%) | <b>0,001</b> |
|                                        | % per week median (IQR) | 10.3% (8.9% - 11.9%)  | 7.6% (6.6% - 9.1%)    | -35.3% (-44.2 - -12.9%)  | <b>0,013</b> |

\* not enough data for calculating difference in intubation rates

\*\* invasive means any intravenous or intranasal or intramuscular or intraosseal medication given

MICU = mobile intensive care unit

5



1  
2  
3  
4  
5  
6  
7  
8  
9  
10  
11  
12  
13  
14  
15  
16  
17  
18  
19  
20  
21  
22  
23  
24  
25  
26  
27  
28  
29  
30  
31  
32  
33  
34  
35  
36  
37  
38  
39  
40  
41  
42  
43  
44  
45  
46  
47  
48  
49  
50  
51  
52  
53  
54  
55  
56  
57  
58  
59  
60

1 **Supplementary Materials:**

- 2 1. Statistics on EMS contacts
- 3 2. A flow-chart of EMS contacts in 2020 and possible suspicion of COVID-19 infection
- 4 EMS = Emergency Medical Services
- 5 ED = Emergency Department
- 6 resp infection = respiratory infection
- 7 3. A Strengthening the Reporting of Observational Studies in Epidemiology (STROBE)
- 8 checklist for cohort studies

Confidential: For Review Only

1  
2  
3  
4  
5  
6  
7  
8  
9  
10  
11  
12  
13  
14  
15  
16  
17  
18  
19  
20  
21  
22  
23  
24  
25  
26  
27  
28  
29  
30  
31  
32  
33  
34  
35  
36  
37  
38  
39  
40  
41  
42  
43  
44  
45  
46  
47  
48  
49  
50  
51  
52  
53  
54  
55  
56  
57  
58  
59  
60

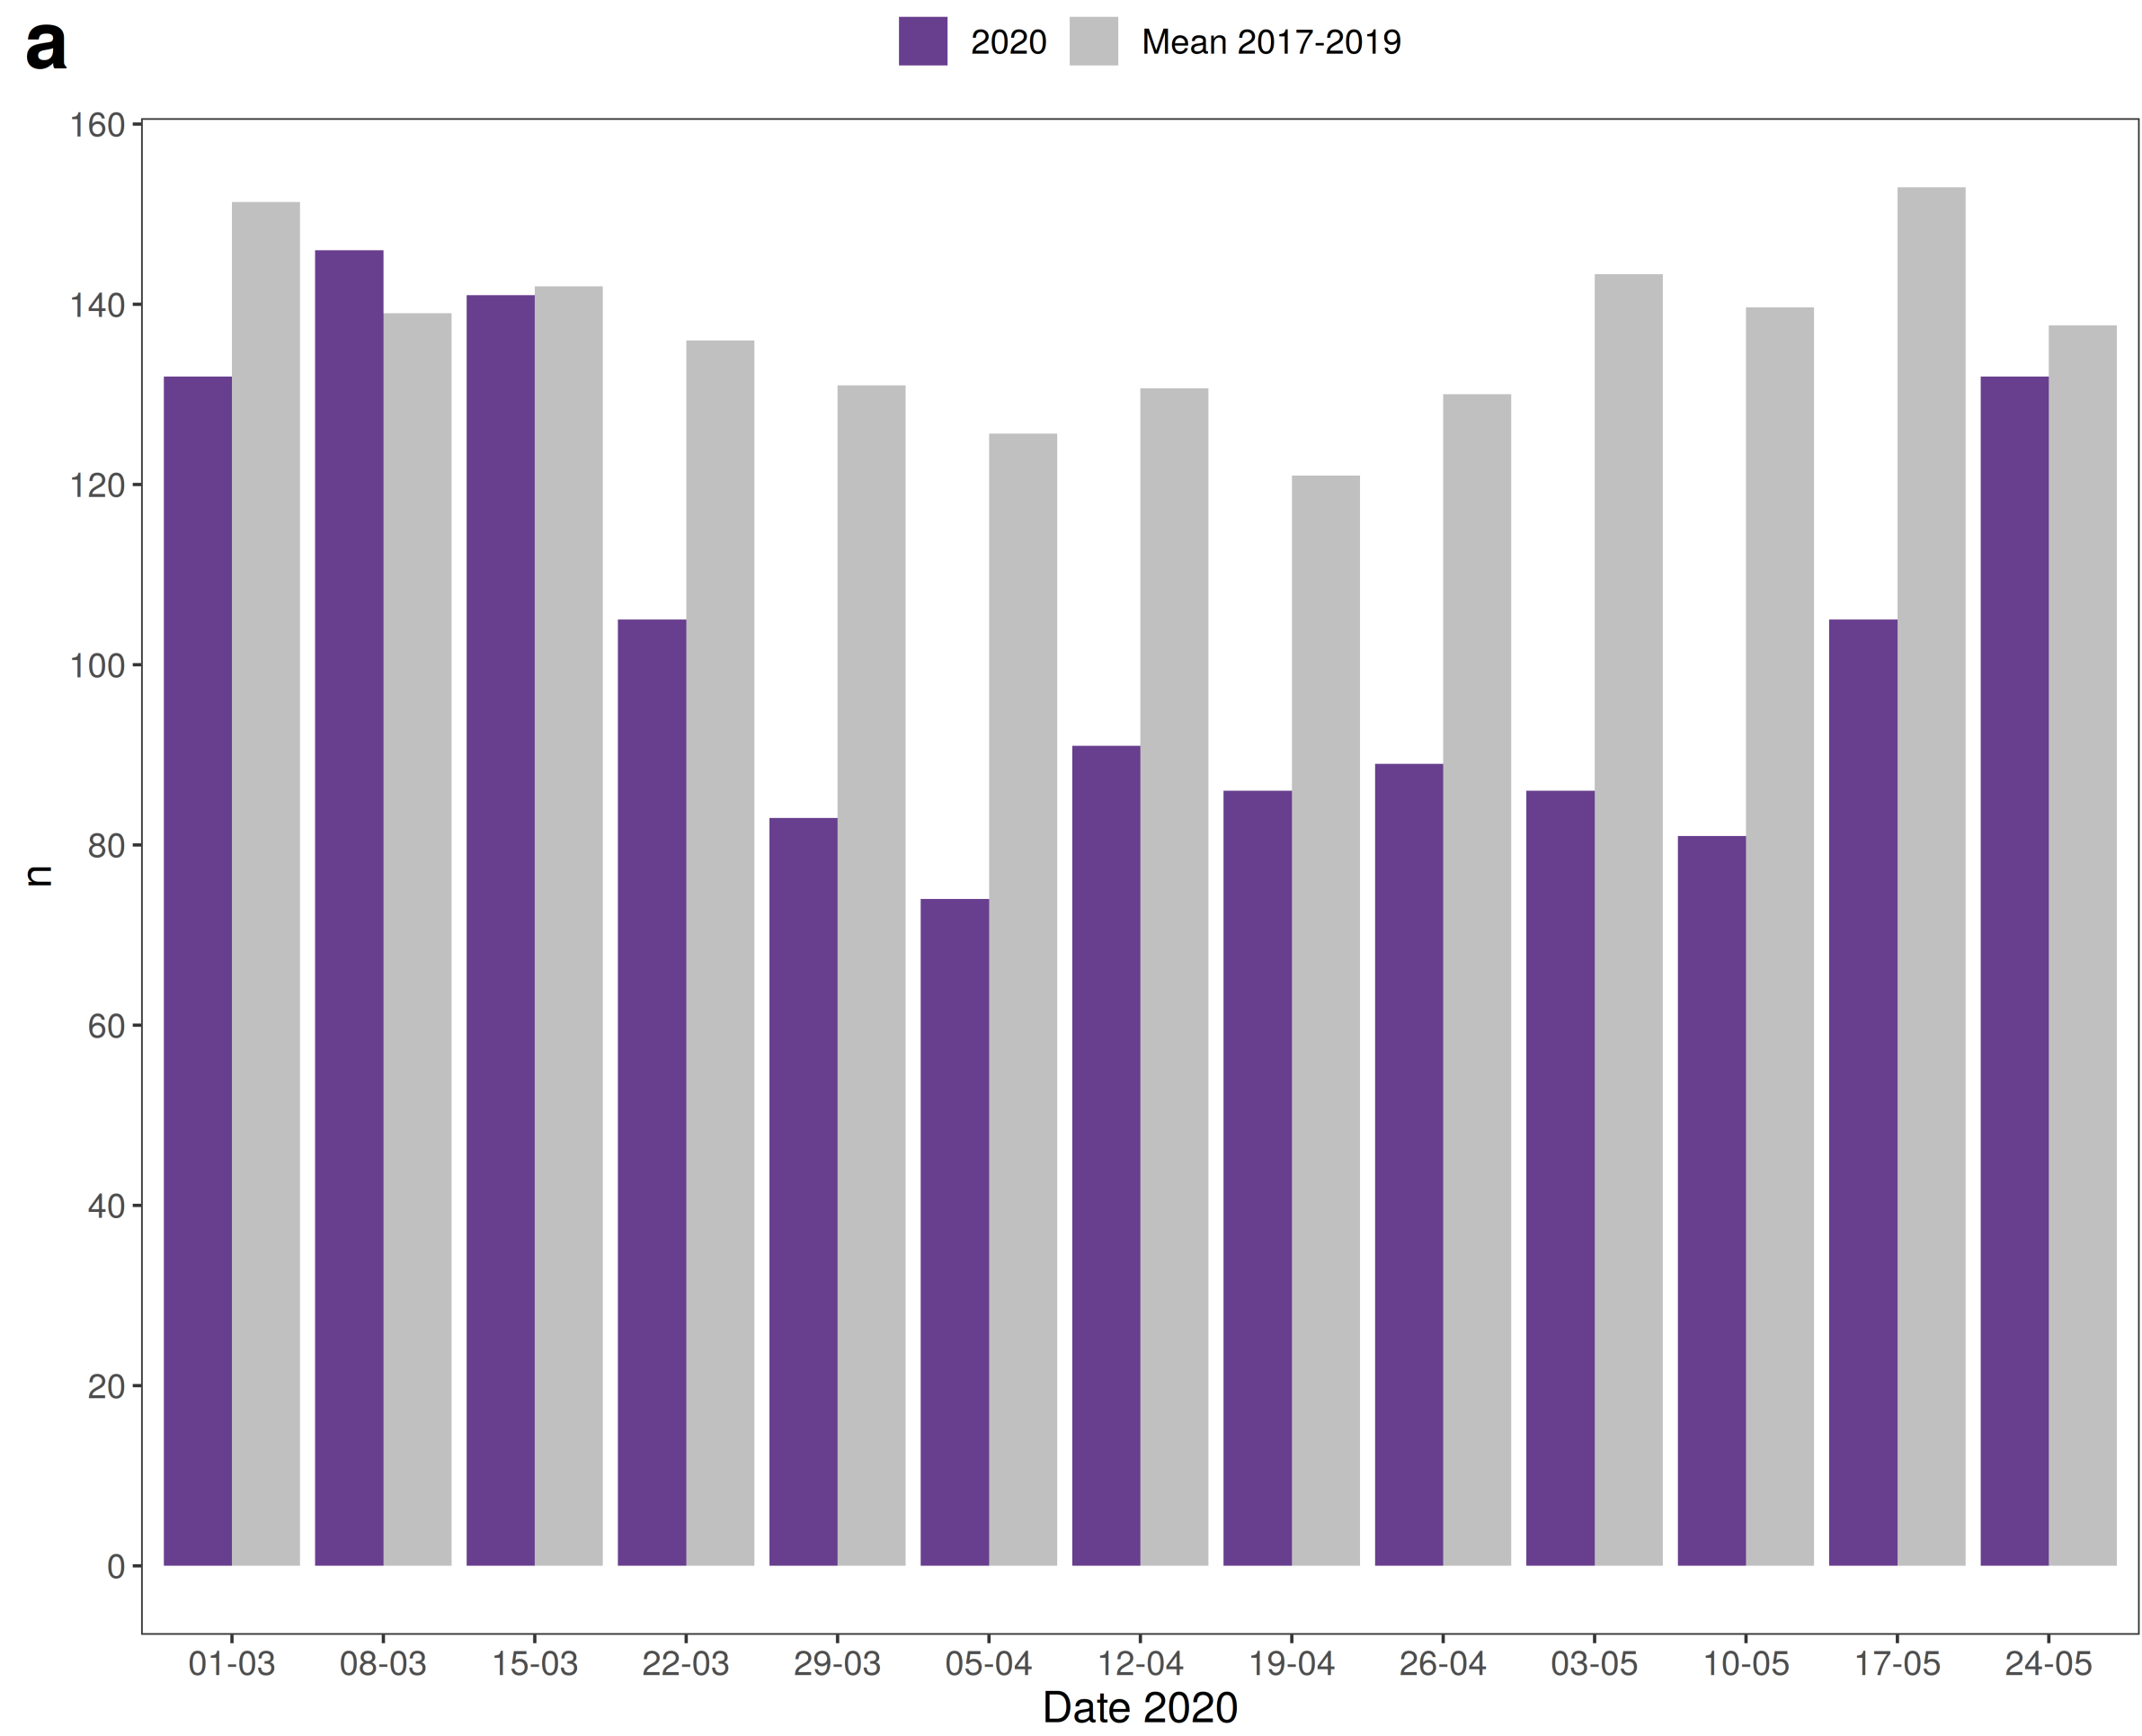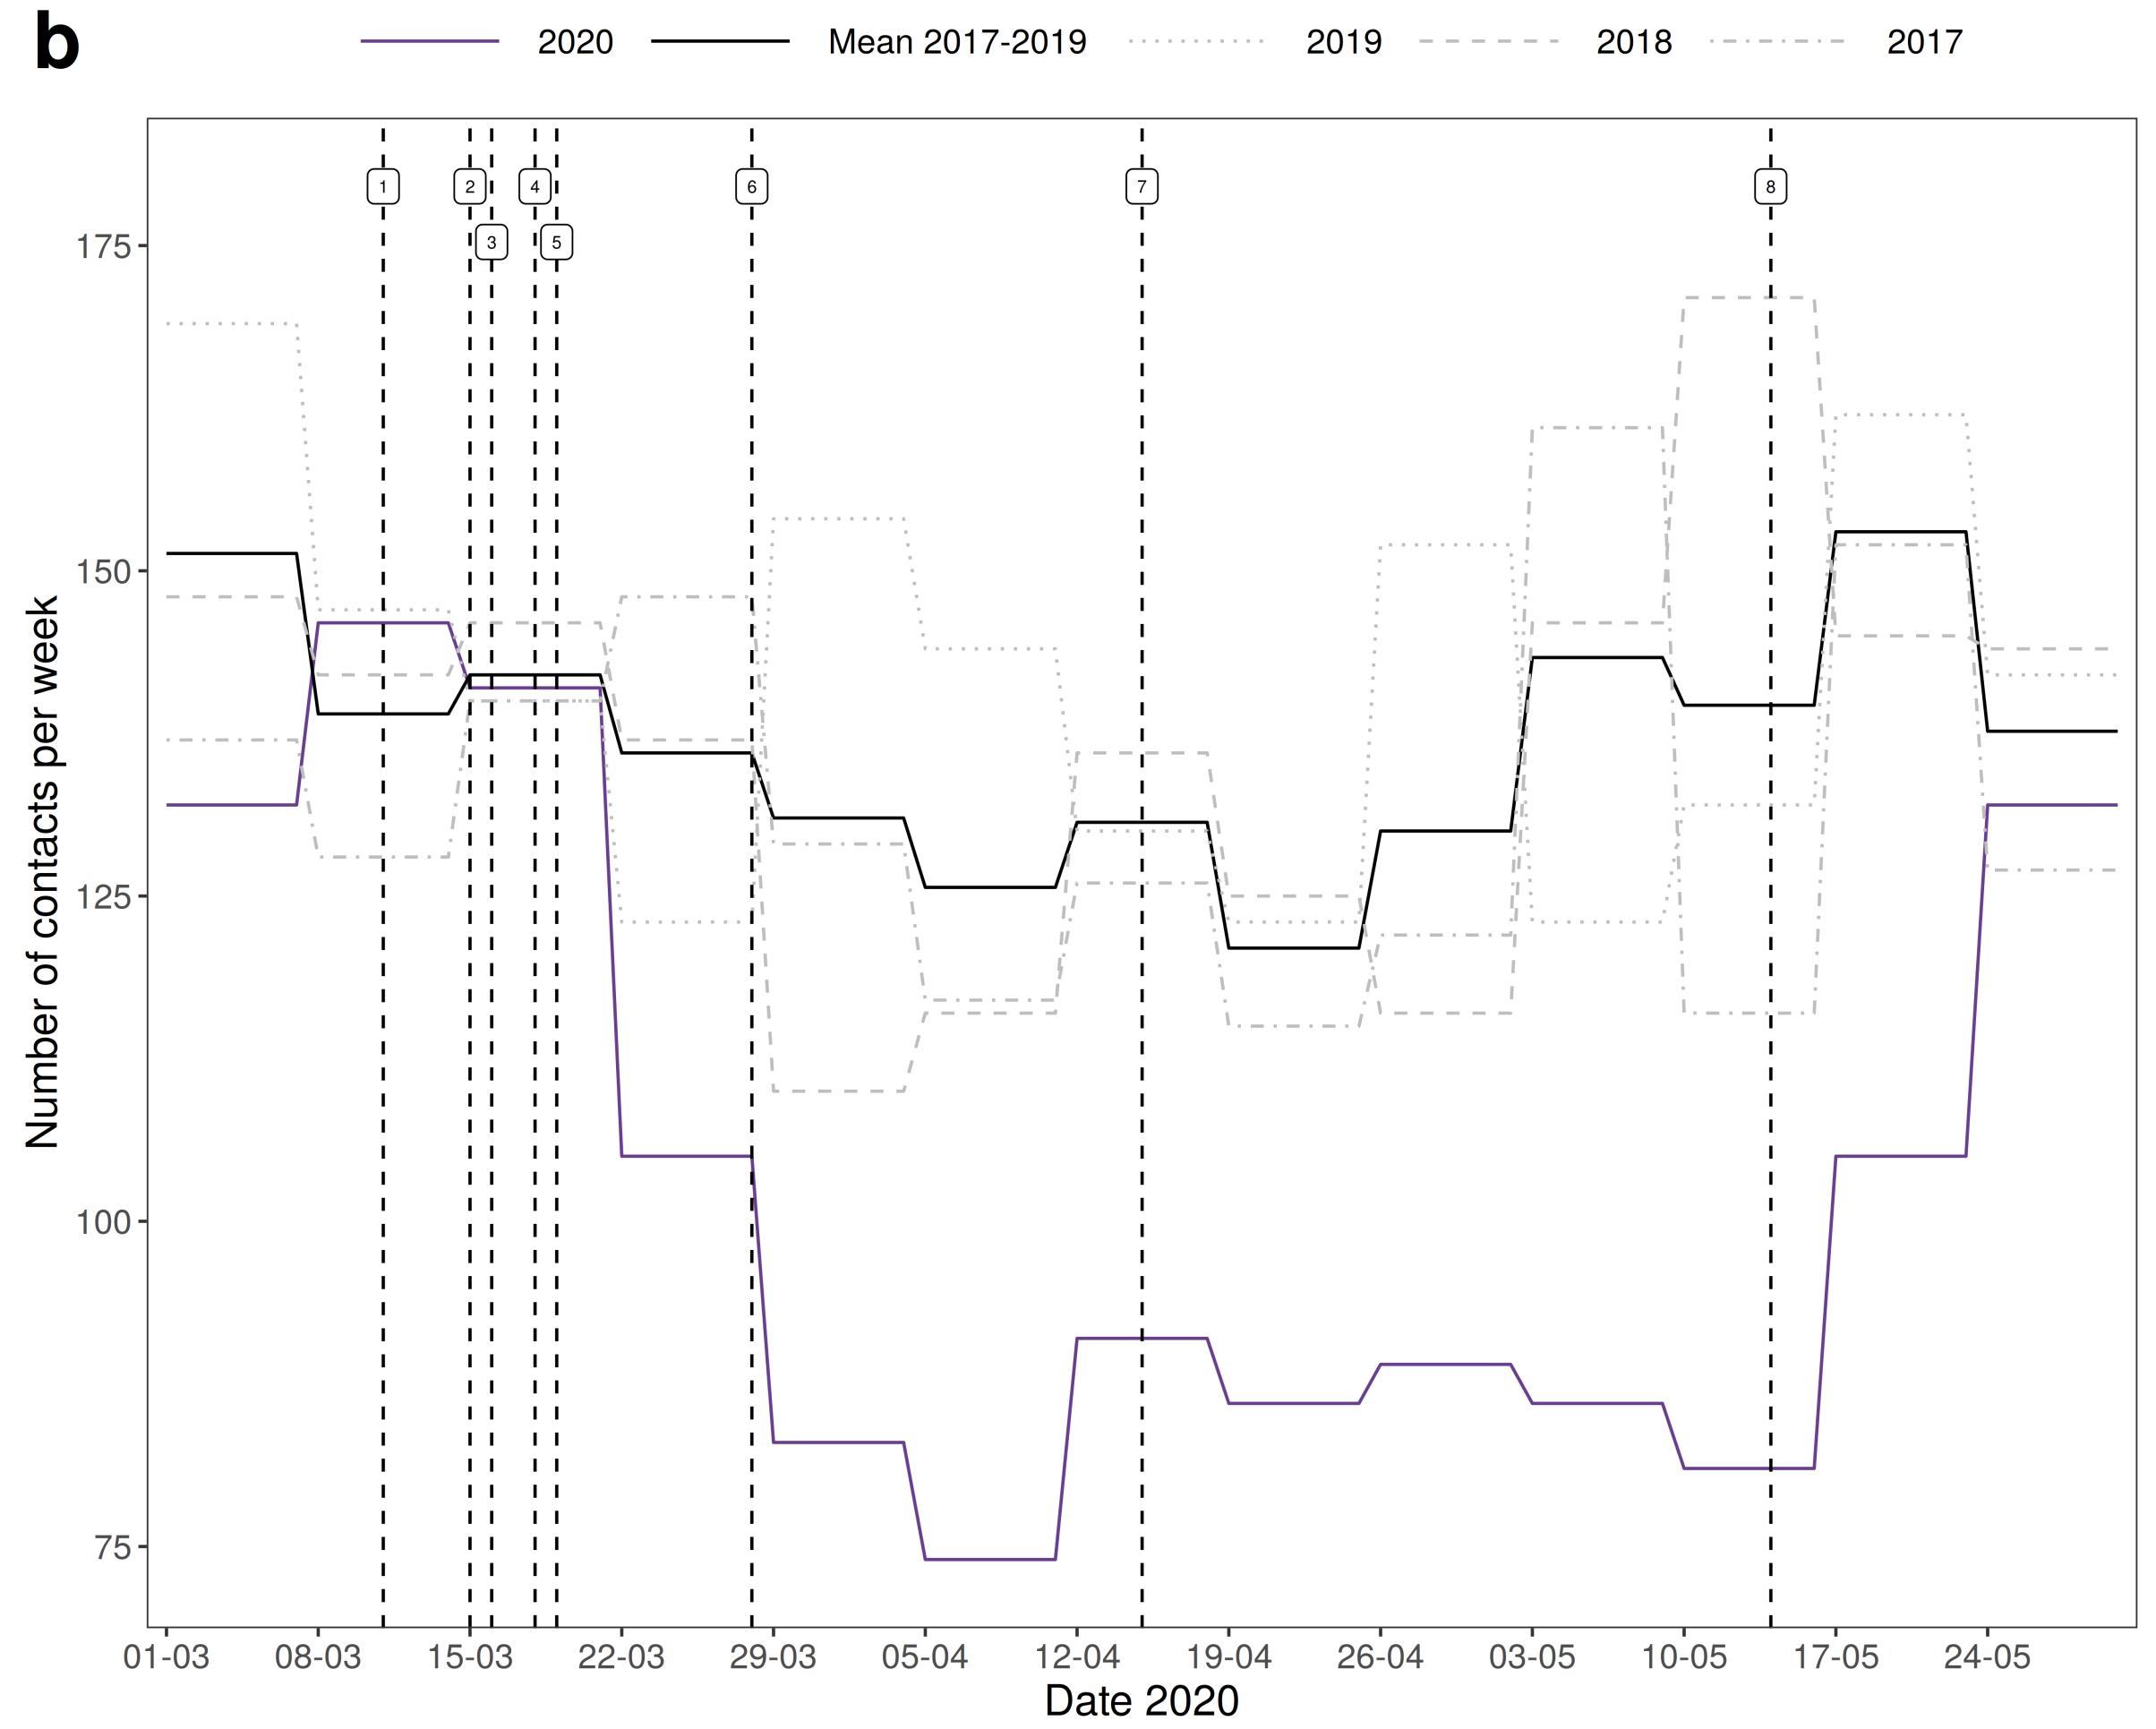

1  
2  
3  
4  
5  
6  
7  
8  
9  
10  
11  
12  
13  
14  
15  
16  
17  
18  
19  
20  
21  
22  
23  
24  
25  
26  
27  
28  
29  
30  
31  
32  
33  
34  
35  
36  
37  
38  
39  
40  
41  
42  
43  
44  
45  
46  
47  
48  
49  
50  
51  
52  
53  
54  
55  
56  
57  
58  
59  
60

— 2020 — Mean 2017-2019 ..... 2019 - - - - 2018 - . - . - 2017

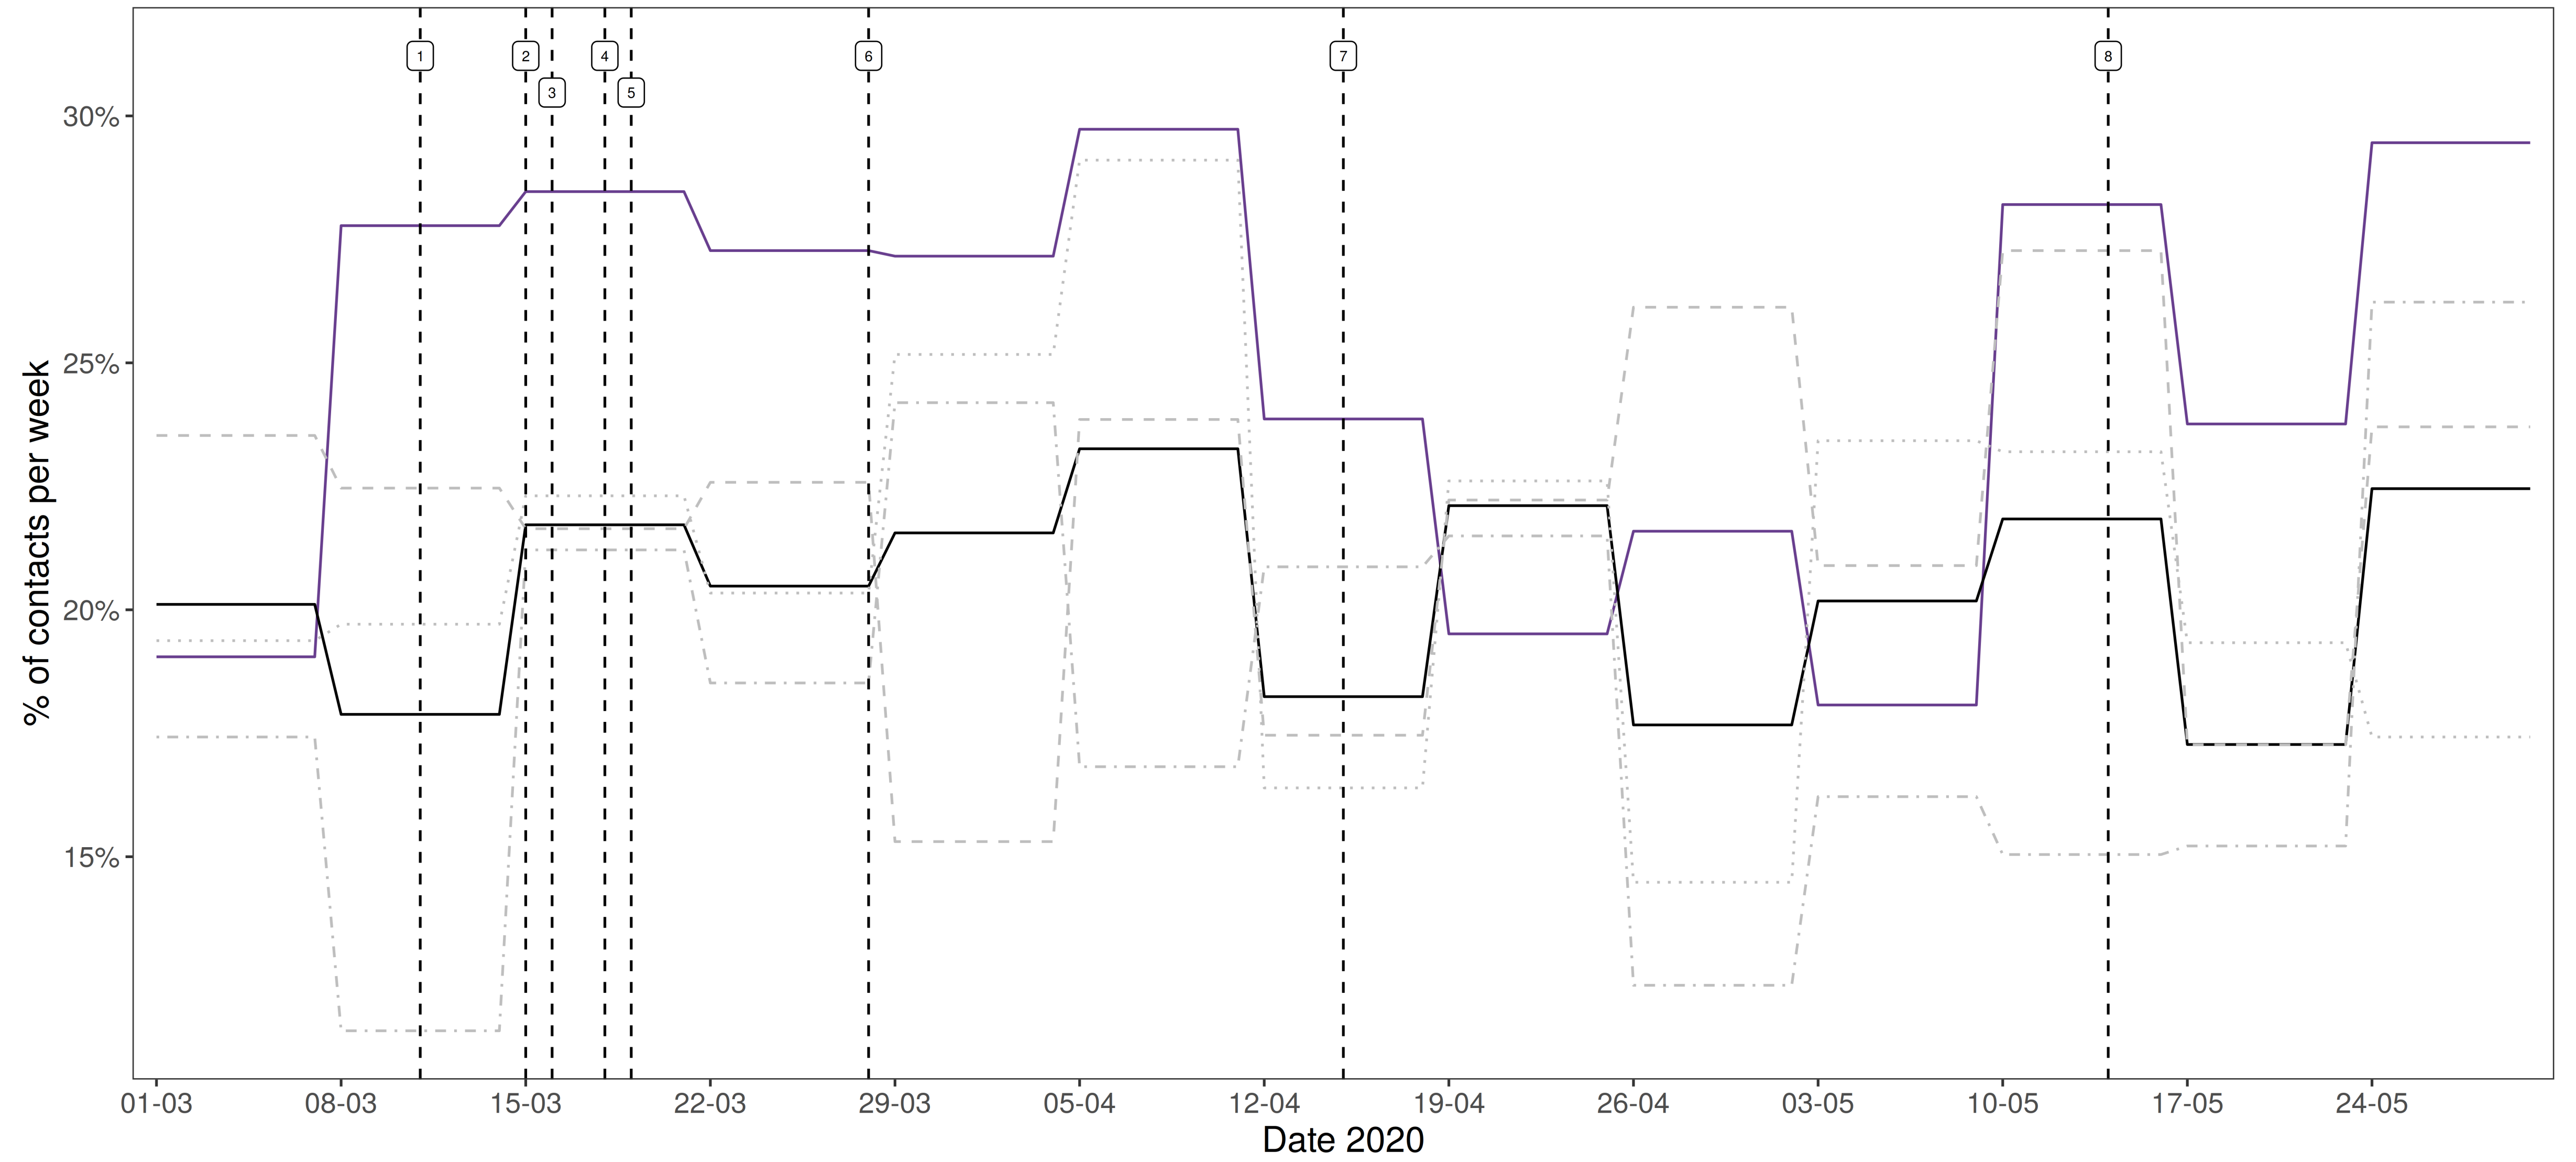

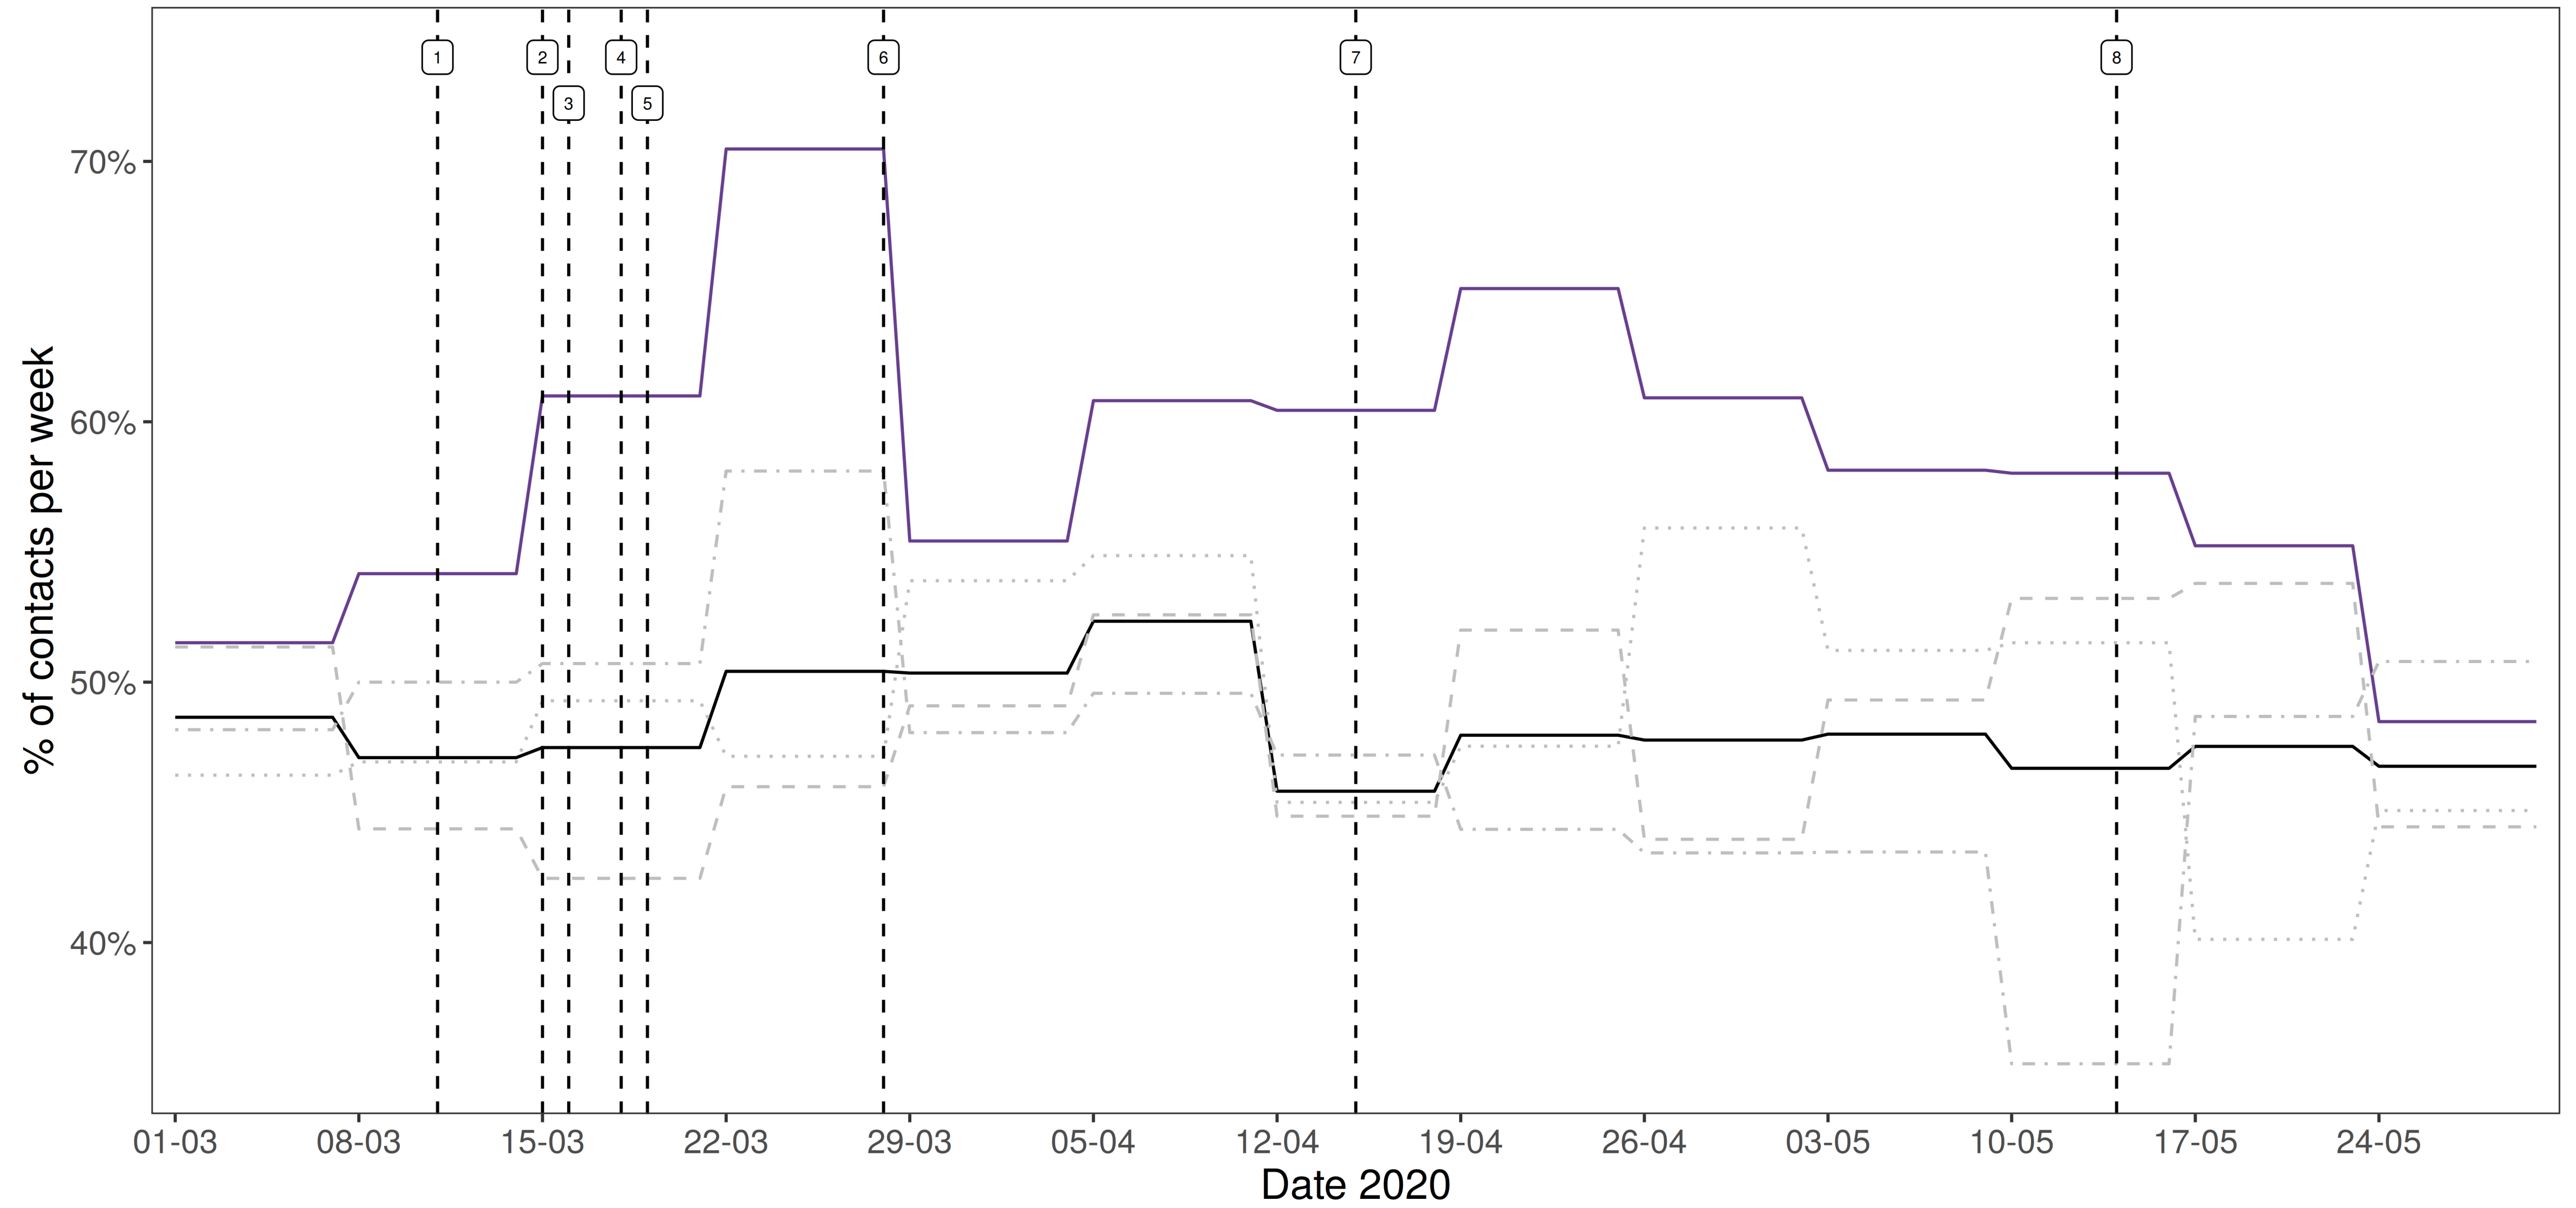

1  
2  
3  
4  
5  
6  
7  
8  
9  
10  
11  
12  
13  
14  
15  
16  
17  
18  
19  
20  
21  
22  
23  
24  
25  
26  
27  
28  
29  
30  
31  
32  
33  
34  
35  
36  
37  
38  
39  
40  
41  
42  
43  
44  
45  
46  
47  
48  
49  
50  
51  
52  
53  
54  
55  
56  
57  
58  
59  
60

1  
2  
3 **1 Supplementary Material 1: Supplementary statistics**4  
5 **2**6 **3 Supplementary Table 1. Descriptive statistics.**

|                                      |                         | 2017                  | 2018                  | 2019                  | 2020                  |
|--------------------------------------|-------------------------|-----------------------|-----------------------|-----------------------|-----------------------|
| Age (years)                          |                         | 6.4<br>(2.0 - 13.2)   | 6.5<br>(1.9 - 12.6)   | 6.3<br>(2.1 - 12.5)   | 5.3<br>(1.8 - 12.0)   |
| Sex (male)                           | all n (%)               | 915 (53.2%)           | 980 (54.6%)           | 1001 (54.1%)          | 753 (55.1%)           |
|                                      | n per week median (IQR) | 67.0 (61.0 - 82.0)    | 75.0 (65.0 - 80.0)    | 76.0 (71.0 - 80.0)    | 53.0 (48.0 - 70.0)    |
|                                      | % per week median (IQR) | 55.3% (51.7% - 55.6%) | 55.2% (53.7% - 56.1%) | 52.3% (51.8% - 58.3%) | 54.3% (52.7% - 56.2%) |
| Native language (Finnish or Swedish) | all n (%)               | 1327 (81.8%)          | 1310 (77.7%)          | 1377 (79.1%)          | 991 (74.7%)           |
|                                      | n per week median (IQR) | 104.0 (91.0 - 109.0)  | 104.0 (91.0 - 106.0)  | 102.0 (95.0 - 110.0)  | 69.0 (66.0 - 91.0)    |
|                                      | % per week median (IQR) | 82.6% (78.8% - 84.8%) | 77.5% (76.3% - 79.1%) | 79.7% (76.8% - 80.7%) | 72.8% (71.8% - 78.4%) |

17 **4 IQR = Interquartile Range**18 **5**19 **6**  
20  
21  
22  
23  
24  
25  
26  
27  
28  
29  
30  
31  
32  
33  
34  
35  
36  
37  
38  
39  
40  
41  
42  
43  
44  
45  
46  
47  
48  
49  
50  
51  
52  
53  
54  
55  
56  
57  
58  
59  
60

**Supplementary Table 2.** The number of EMS contacts during the control periods for each month and their proportions (%) of all control-period EMS contacts. The Chi-squared test was used to calculate the significance of the variation within the control periods.

| Year | March     | April     | June      | p    |
|------|-----------|-----------|-----------|------|
| 2017 | 602 (11%) | 516 (10%) | 606 (11%) | 0,10 |
| 2018 | 621 (12%) | 524 (10%) | 656 (12%) |      |
| 2019 | 643 (12%) | 606 (11%) | 609 (11%) |      |

### 1 Supplementary Table 3. Change in the dispatch and transportation codes.

|                            |                         | 2017                  | 2018                  | 2019                  | 2020                  |
|----------------------------|-------------------------|-----------------------|-----------------------|-----------------------|-----------------------|
| All EMS contacts           | all n (%)               | 1724 (100.0%)         | 1801 (100.0%)         | 1858 (100.0%)         | 1369 (100.0%)         |
|                            | n per week median (IQR) | 128.0 (122.0 - 140.0) | 142.0 (125.0 - 146.0) | 142.0 (130.0 - 152.0) | 91.0 (86.0 - 132.0)   |
| Dispatch priority A*       | all n (%)               | 42 (2.4%)             | 43 (2.4%)             | 81 (4.4%)             | 90 (6.6%)             |
|                            | n per week median (IQR) | 3.0 (2.0 - 4.0)       | 3.0 (2.0 - 4.0)       | 5.0 (2.0 - 5.0)       | 8.0 (7.0 - 8.0)       |
|                            | % per week median (IQR) | 2.3% (1.6% - 2.6%)    | 2.1% (1.6% - 2.9%)    | 3.3% (1.6% - 4.1%)    | 6.1% (5.7% - 8.4%)    |
| Dispatch priority B*       | all n (%)               | 693 (40.2%)           | 677 (37.6%)           | 702 (37.8%)           | 478 (34.9%)           |
|                            | n per week median (IQR) | 53.0 (47.0 - 58.0)    | 49.0 (46.0 - 53.0)    | 53.0 (46.0 - 59.0)    | 37.0 (30.0 - 43.0)    |
|                            | % per week median (IQR) | 38.8% (37.3% - 42.3%) | 39.0% (32.4% - 40.4%) | 38.7% (34.4% - 40.7%) | 36.1% (31.5% - 38.1%) |
| Dispatch priority C*       | all n (%)               | 882 (51.2%)           | 969 (53.8%)           | 947 (51.0%)           | 658 (48.1%)           |
|                            | n per week median (IQR) | 65.0 (63.0 - 70.0)    | 74.0 (69.0 - 86.0)    | 72.0 (69.0 - 80.0)    | 44.0 (43.0 - 57.0)    |
|                            | % per week median (IQR) | 52.1% (50.4% - 54.3%) | 54.0% (51.7% - 56.0%) | 52.0% (47.3% - 56.9%) | 49.4% (45.7% - 51.4%) |
| Dispatch priority D*       | all n (%)               | 107 (6.2%)            | 112 (6.2%)            | 128 (6.9%)            | 143 (10.4%)           |
|                            | n per week median (IQR) | 7.0 (7.0 - 10.0)      | 8.0 (7.0 - 10.0)      | 10.0 (7.0 - 13.0)     | 10.0 (8.0 - 12.0)     |
|                            | % per week median (IQR) | 5.7% (4.8% - 7.1%)    | 5.8% (4.7% - 7.3%)    | 5.9% (5.6% - 8.8%)    | 9.5% (8.1% - 11.4%)   |
| Transported patients       | all n (%)               | 902 (52.4%)           | 930 (51.6%)           | 950 (51.2%)           | 578 (42.3%)           |
|                            | n per week median (IQR) | 67.0 (64.0 - 71.0)    | 74.0 (65.0 - 79.0)    | 71.0 (65.0 - 78.0)    | 36.0 (34.0 - 54.0)    |
|                            | % per week median (IQR) | 51.8% (50.0% - 55.7%) | 50.9% (48.0% - 55.6%) | 52.5% (48.5% - 53.8%) | 41.9% (39.1% - 44.8%) |
| Transportation priority A* | all n (%)               | 8 (0.5%)              | 15 (0.8%)             | 14 (0.8%)             | 6 (0.4%)              |
|                            | n per week median (IQR) | 1.0 (1.0 - 1.8)       | 1.0 (1.0 - 2.0)       | 1.0 (1.0 - 2.0)       | 1.0 (1.0 - 1.0)       |
|                            | % per week median (IQR) | 0.9% (0.8% - 1.2%)    | 0.8% (0.7% - 1.4%)    | 0.8% (0.7% - 1.3%)    | 1.2% (0.9% - 1.2%)    |
| Transportation priority B* | all n (%)               | 89 (5.2%)             | 84 (4.7%)             | 104 (5.6%)            | 62 (4.5%)             |
|                            | n per week median (IQR) | 6.0 (5.0 - 8.0)       | 7.0 (4.0 - 8.0)       | 8.0 (5.0 - 11.0)      | 5.0 (3.0 - 5.0)       |
|                            | % per week median (IQR) | 4.7% (3.9% - 5.7%)    | 5.1% (3.4% - 5.5%)    | 6.4% (3.4% - 6.6%)    | 5.0% (3.5% - 5.7%)    |
| Transportation priority C* | all n (%)               | 587 (34.1%)           | 601 (33.4%)           | 618 (33.3%)           | 398 (29.2%)           |
|                            | n per week median (IQR) | 44.0 (40.0 - 47.0)    | 47.0 (42.0 - 50.0)    | 45.0 (41.0 - 50.0)    | 25.0 (22.0 - 41.0)    |
|                            | % per week median (IQR) | 33.3% (32.0% - 36.6%) | 34.2% (30.4% - 37.1%) | 33.3% (29.6% - 35.1%) | 29.1% (25.6% - 31.2%) |
| Transportation priority D* | all n (%)               | 218 (12.7%)           | 230 (12.8%)           | 213 (11.5%)           | 113 (8.3%)            |
|                            | n per week median (IQR) | 15.0 (13.0 - 20.0)    | 17.0 (14.0 - 21.0)    | 15.0 (14.0 - 19.0)    | 7.0 (6.0 - 9.0)       |
|                            | % per week median (IQR) | 13.0% (10.3% - 14.6%) | 12.9% (11.7% - 14.4%) | 11.3% (9.9% - 13.2%)  | 7.4% (6.6% - 8.6%)    |
| Trauma patients            | all n (%)               | 605 (35.1%)           | 564 (31.3%)           | 649 (34.9%)           | 504 (36.8%)           |
|                            | n per week median (IQR) | 42.0 (40.0 - 50.0)    | 41.0 (33.0 - 48.0)    | 50.0 (40.0 - 56.0)    | 36.0 (31.0 - 41.0)    |
|                            | % per week median (IQR) | 33.8% (30.5% - 38.1%) | 28.4% (25.5% - 32.9%) | 34.0% (29.3% - 40.7%) | 39.0% (33.3% - 41.7%) |
| Non-transported patients   | all n (%)               | 820 (47.6%)           | 871 (48.4%)           | 907 (48.9%)           | 786 (57.6%)           |
|                            | n per week median (IQR) | 64.0 (58.0 - 70.0)    | 63.0 (61.0 - 72.0)    | 68.0 (63.0 - 78.0)    | 56.0 (50.0 - 68.0)    |
|                            | % per week median (IQR) | 48.2% (44.3% - 50.0%) | 49.1% (44.4% - 52.0%) | 47.5% (46.4% - 51.5%) | 58.1% (55.2% - 60.9%) |

2 \* the priority class from A to D refers to the urgency of the dispatch /transportation and /or to  
 3 the risk of the symptom to a patient – A being the contact with highest urgency and risk and D the  
 4 lowest urgency and risk  
 5 EMS = Emergency Medical Services  
 6 IQR = Interquartile Range

7

**1 Supplementary Table 4. Change in the interventions performed on-scene**

|                                        |                         | 2017                  | 2018                  | 2019                  | 2020                  |
|----------------------------------------|-------------------------|-----------------------|-----------------------|-----------------------|-----------------------|
| additional help requested              | all n (%)               | 81 (4.7%)             | 74 (4.1%)             | 105 (5.7%)            | 94 (6.9%)             |
|                                        | n per week median (IQR) | 6.0 (5.0 - 6.0)       | 5.0 (3.0 - 8.0)       | 7.0 (5.0 - 7.0)       | 7.0 (5.0 - 9.0)       |
|                                        | % per week median (IQR) | 4.1% (3.9% - 4.7%)    | 3.4% (2.6% - 4.9%)    | 4.5% (4.1% - 5.4%)    | 6.8% (4.5% - 8.5%)    |
| MICU on-scene                          | all n (%)               | 25 (1.5%)             | 23 (1.3%)             | 30 (1.6%)             | 24 (1.8%)             |
|                                        | n per week median (IQR) | 2.0 (1.8 - 2.2)       | 2.0 (1.5 - 2.0)       | 2.0 (1.5 - 3.5)       | 2.0 (2.0 - 2.8)       |
|                                        | % per week median (IQR) | 1.6% (1.2% - 1.9%)    | 1.4% (1.0% - 1.7%)    | 1.6% (1.1% - 2.6%)    | 2.3% (1.4% - 2.5%)    |
| emergency physician consulted by phone | all n (%)               | 308 (17.9%)           | 261 (14.5%)           | 305 (16.4%)           | 236 (17.2%)           |
|                                        | n per week median (IQR) | 23.0 (22.0 - 27.0)    | 20.0 (18.0 - 23.0)    | 23.0 (21.0 - 25.0)    | 18.0 (15.0 - 20.0)    |
|                                        | % per week median (IQR) | 17.9% (16.8% - 20.0%) | 15.4% (11.6% - 17.6%) | 16.0% (14.3% - 18.5%) | 17.6% (15.6% - 18.1%) |
| any measurements done on-scene         | all n (%)               | 1615 (93.7%)          | 1695 (94.1%)          | 1769 (95.2%)          | 1280 (93.5%)          |
|                                        | n per week median (IQR) | 120.0 (116.0 - 130.0) | 131.0 (112.0 - 141.0) | 135.0 (121.0 - 144.0) | 88.0 (78.0 - 124.0)   |
|                                        | % per week median (IQR) | 93.0% (92.2% - 94.9%) | 94.9% (93.0% - 95.5%) | 95.7% (93.8% - 96.3%) | 93.9% (91.9% - 95.3%) |
| intubation*                            | all n (%)               | 2 (0.1%)              | 3 (0.2%)              | 1 (0.1%)              | 3 (0.2%)              |
|                                        | n per week median (IQR) | 1.0 (1.0 - 1.0)       | 1.0 (1.0 - 1.0)       | 1.0 (1.0 - 1.0)       | 1.5 (1.2 - 1.8)       |
|                                        | % per week median (IQR) | 0.8% (0.8% - 0.8%)    | 0.7% (0.7% - 0.7%)    | 0.6% (0.6% - 0.6%)    | 1.3% (1.2% - 1.3%)    |
| supplementary oxygen given             | all n (%)               | 38 (2.2%)             | 47 (2.6%)             | 40 (2.2%)             | 16 (1.2%)             |
|                                        | n per week median (IQR) | 3.0 (2.0 - 4.0)       | 3.0 (2.0 - 5.0)       | 3.0 (2.0 - 4.5)       | 2.0 (1.0 - 2.2)       |
|                                        | % per week median (IQR) | 2.4% (1.6% - 2.8%)    | 2.2% (1.7% - 3.6%)    | 2.4% (1.3% - 3.0%)    | 1.5% (1.2% - 2.4%)    |
| intravenous connection established     | all n (%)               | 128 (7.4%)            | 123 (6.8%)            | 149 (8.0%)            | 65 (4.7%)             |
|                                        | n per week median (IQR) | 10.0 (8.0 - 11.0)     | 9.0 (7.0 - 11.0)      | 10.0 (10.0 - 14.0)    | 5.0 (3.0 - 7.0)       |
|                                        | % per week median (IQR) | 8.5% (5.6% - 8.7%)    | 6.4% (5.8% - 7.5%)    | 8.0% (6.5% - 8.9%)    | 4.4% (2.9% - 5.8%)    |
| any medication given                   | all n (%)               | 170 (9.9%)            | 206 (11.4%)           | 209 (11.2%)           | 111 (8.1%)            |
|                                        | n per week median (IQR) | 14.0 (12.0 - 15.0)    | 14.0 (14.0 - 18.0)    | 15.0 (13.0 - 18.0)    | 7.0 (6.0 - 9.0)       |
|                                        | % per week median (IQR) | 10.4% (8.8% - 12.1%)  | 10.3% (9.6% - 12.5%)  | 10.7% (9.0% - 13.1%)  | 7.6% (6.6% - 9.1%)    |

2 \* not enough data for calculating difference in intubation rates

3 \*\* invasive means any intravenous or intranasal or intramuscular or intraosseal medication given

4 MICU = mobile intensive care unit

Review Only





**STROBE 2007 (v4) Statement—Checklist of items that should be included in reports of *cohort studies***

| Section/Topic            | Item # | Recommendation                                                                                                                                                                       | Reported on page #       |
|--------------------------|--------|--------------------------------------------------------------------------------------------------------------------------------------------------------------------------------------|--------------------------|
| Title and abstract       | 1      | (a) Indicate the study's design with a commonly used term in the title or the abstract                                                                                               | #1                       |
|                          |        | (b) Provide in the abstract an informative and balanced summary of what was done and what was found                                                                                  | #4                       |
| <b>Introduction</b>      |        |                                                                                                                                                                                      |                          |
| Background/rationale     | 2      | Explain the scientific background and rationale for the investigation being reported                                                                                                 | #5                       |
| Objectives               | 3      | State specific objectives, including any prespecified hypotheses                                                                                                                     | #5                       |
| <b>Methods</b>           |        |                                                                                                                                                                                      |                          |
| Study design             | 4      | Present key elements of study design early in the paper                                                                                                                              | #5-#8                    |
| Setting                  | 5      | Describe the setting, locations, and relevant dates, including periods of recruitment, exposure, follow-up, and data collection                                                      | #6-#8                    |
| Participants             | 6      | (a) Give the eligibility criteria, and the sources and methods of selection of participants. Describe methods of follow-up                                                           | #6-#8                    |
|                          |        | (b) For matched studies, give matching criteria and number of exposed and unexposed                                                                                                  | n/a                      |
| Variables                | 7      | Clearly define all outcomes, exposures, predictors, potential confounders, and effect modifiers. Give diagnostic criteria, if applicable                                             | #6-#8                    |
| Data sources/measurement | 8*     | For each variable of interest, give sources of data and details of methods of assessment (measurement). Describe comparability of assessment methods if there is more than one group | #6-#8                    |
| Bias                     | 9      | Describe any efforts to address potential sources of bias                                                                                                                            | #5, #15                  |
| Study size               | 10     | Explain how the study size was arrived at                                                                                                                                            | #6-#8                    |
| Quantitative variables   | 11     | Explain how quantitative variables were handled in the analyses. If applicable, describe which groupings were chosen and why                                                         | #7-#8                    |
| Statistical methods      | 12     | (a) Describe all statistical methods, including those used to control for confounding                                                                                                | #7-#8                    |
|                          |        | (b) Describe any methods used to examine subgroups and interactions                                                                                                                  | n/a                      |
|                          |        | (c) Explain how missing data were addressed                                                                                                                                          | n/a                      |
|                          |        | (d) If applicable, explain how loss to follow-up was addressed                                                                                                                       | Supplementary Material 2 |
|                          |        | (e) Describe any sensitivity analyses                                                                                                                                                | n/a                      |

| <b>Results</b>           |     |                                                                                                                                                                                                              |                                      |
|--------------------------|-----|--------------------------------------------------------------------------------------------------------------------------------------------------------------------------------------------------------------|--------------------------------------|
| Participants             | 13* | (a) Report numbers of individuals at each stage of study—eg numbers potentially eligible, examined for eligibility, confirmed eligible, included in the study, completing follow-up, and analysed            | Supplementary Material 1 and 2       |
|                          |     | (b) Give reasons for non-participation at each stage                                                                                                                                                         | n/a                                  |
|                          |     | (c) Consider use of a flow diagram                                                                                                                                                                           | Supplementary Material 2             |
| Descriptive data         | 14* | (a) Give characteristics of study participants (eg demographic, clinical, social) and information on exposures and potential confounders                                                                     | Supplementary Material 1             |
|                          |     | (b) Indicate number of participants with missing data for each variable of interest                                                                                                                          | Supplementary Material 2             |
|                          |     | (c) Summarise follow-up time (eg, average and total amount)                                                                                                                                                  | Figure 1, Supplementary Material 1,2 |
| Outcome data             | 15* | Report numbers of outcome events or summary measures over time                                                                                                                                               | Table 1-3, Supplementary Material 1  |
| Main results             | 16  | (a) Give unadjusted estimates and, if applicable, confounder-adjusted estimates and their precision (eg, 95% confidence interval). Make clear which confounders were adjusted for and why they were included | Table 1,2, Supplementary Material 1  |
|                          |     | (b) Report category boundaries when continuous variables were categorized                                                                                                                                    | n/a                                  |
|                          |     | (c) If relevant, consider translating estimates of relative risk into absolute risk for a meaningful time period                                                                                             | n/a                                  |
| Other analyses           | 17  | Report other analyses done—eg analyses of subgroups and interactions, and sensitivity analyses                                                                                                               | Supplementary Material 1             |
| <b>Discussion</b>        |     |                                                                                                                                                                                                              |                                      |
| Key results              | 18  | Summarise key results with reference to study objectives                                                                                                                                                     | #11                                  |
| <b>Limitations</b>       |     |                                                                                                                                                                                                              |                                      |
| Interpretation           | 20  | Give a cautious overall interpretation of results considering objectives, limitations, multiplicity of analyses, results from similar studies, and other relevant evidence                                   | #11-15                               |
| Generalisability         | 21  | Discuss the generalisability (external validity) of the study results                                                                                                                                        | #14-15                               |
| <b>Other information</b> |     |                                                                                                                                                                                                              |                                      |

|         |    |                                                                                                                                                               |     |
|---------|----|---------------------------------------------------------------------------------------------------------------------------------------------------------------|-----|
| Funding | 22 | Give the source of funding and the role of the funders for the present study and, if applicable, for the original study on which the present article is based | #16 |
|---------|----|---------------------------------------------------------------------------------------------------------------------------------------------------------------|-----|

\*Give information separately for cases and controls in case-control studies and, if applicable, for exposed and unexposed groups in cohort and cross-sectional studies.

**Note:** An Explanation and Elaboration article discusses each checklist item and gives methodological background and published examples of transparent reporting. The STROBE checklist is best used in conjunction with this article (freely available on the Web sites of PLoS Medicine at <http://www.plosmedicine.org/>, Annals of Internal Medicine at <http://www.annals.org/>, and Epidemiology at <http://www.epidem.com/>). Information on the STROBE Initiative is available at [www.strobe-statement.org](http://www.strobe-statement.org).

# BMJ Paediatrics Open

## Paediatric prehospital emergencies and restrictions during the COVID-19 pandemic: a population-based study

|                               |                                                                                                                                                                                                                                                                                                                                                                                                                                                                                                                                                                                                                                                                                                                                                                                                                                                                                                                                                                                                                  |
|-------------------------------|------------------------------------------------------------------------------------------------------------------------------------------------------------------------------------------------------------------------------------------------------------------------------------------------------------------------------------------------------------------------------------------------------------------------------------------------------------------------------------------------------------------------------------------------------------------------------------------------------------------------------------------------------------------------------------------------------------------------------------------------------------------------------------------------------------------------------------------------------------------------------------------------------------------------------------------------------------------------------------------------------------------|
| Journal:                      | <i>BMJ Paediatrics Open</i>                                                                                                                                                                                                                                                                                                                                                                                                                                                                                                                                                                                                                                                                                                                                                                                                                                                                                                                                                                                      |
| Manuscript ID                 | bmjpo-2020-000808.R2                                                                                                                                                                                                                                                                                                                                                                                                                                                                                                                                                                                                                                                                                                                                                                                                                                                                                                                                                                                             |
| Article Type:                 | Original research                                                                                                                                                                                                                                                                                                                                                                                                                                                                                                                                                                                                                                                                                                                                                                                                                                                                                                                                                                                                |
| Date Submitted by the Author: | 16-Sep-2020                                                                                                                                                                                                                                                                                                                                                                                                                                                                                                                                                                                                                                                                                                                                                                                                                                                                                                                                                                                                      |
| Complete List of Authors:     | <p>Oulasvirta, Jelena; Helsinki University Central Hospital, Division of Anaesthesiology; Department of Anaesthesiology, Intensive Care and Pain Medicine; University of Helsinki Hospital, Department of Emergency Medicine and Services</p> <p>Pirneskoski, Jussi; Helsinki University Central Hospital, Department of Emergency Medicine and Services</p> <p>Harve-Rytsälä, Heini; Helsinki University Central Hospital, Department of Emergency Medicine and Services</p> <p>Lääperi, Mitja; Helsinki University Central Hospital, Department of Emergency Medicine and Services</p> <p>Kuitunen, Mikael; Helsinki University Central Hospital, New Children's Hospital</p> <p>Kuisma, Markku; Helsinki University Central Hospital, Department of Emergency Medicine and Services</p> <p>Salmi, Heli; Helsinki University Central Hospital, Division of Anaesthesiology; Department of Anaesthesiology, Intensive Care and Pain Medicine; Helsinki University Central Hospital, New Children's Hospital</p> |
| Keywords:                     | Epidemiology, Health services research                                                                                                                                                                                                                                                                                                                                                                                                                                                                                                                                                                                                                                                                                                                                                                                                                                                                                                                                                                           |
|                               |                                                                                                                                                                                                                                                                                                                                                                                                                                                                                                                                                                                                                                                                                                                                                                                                                                                                                                                                                                                                                  |

SCHOLARONE™  
Manuscripts

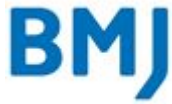

I, the Submitting Author has the right to grant and does grant on behalf of all authors of the Work (as defined in the below author licence), an exclusive licence and/or a non-exclusive licence for contributions from authors who are: i) UK Crown employees; ii) where BMJ has agreed a CC-BY licence shall apply, and/or iii) in accordance with the terms applicable for US Federal Government officers or employees acting as part of their official duties; on a worldwide, perpetual, irrevocable, royalty-free basis to BMJ Publishing Group Ltd ("BMJ") its licensees and where the relevant Journal is co-owned by BMJ to the co-owners of the Journal, to publish the Work in this journal and any other BMJ products and to exploit all rights, as set out in our [licence](#).

The Submitting Author accepts and understands that any supply made under these terms is made by BMJ to the Submitting Author unless you are acting as an employee on behalf of your employer or a postgraduate student of an affiliated institution which is paying any applicable article publishing charge ("APC") for Open Access articles. Where the Submitting Author wishes to make the Work available on an Open Access basis (and intends to pay the relevant APC), the terms of reuse of such Open Access shall be governed by a Creative Commons licence – details of these licences and which [Creative Commons](#) licence will apply to this Work are set out in our licence referred to above.

Other than as permitted in any relevant BMJ Author's Self Archiving Policies, I confirm this Work has not been accepted for publication elsewhere, is not being considered for publication elsewhere and does not duplicate material already published. I confirm all authors consent to publication of this Work and authorise the granting of this licence.

1  
2  
3  
4 1 Paediatric prehospital emergencies and restrictions during the  
5  
6  
7  
8 2 COVID-19 pandemic: a population-based study  
9  
10  
11  
12 3

13  
14  
15 4 Jelena Oulasvirta, MD<sup>1,2</sup>  
16

17  
18 5 Jussi Pirneskoski, MD<sup>2</sup>  
19

20  
21 6 Heini Harve-Rytsälä, MD, PhD<sup>2</sup>  
22

23  
24 7 Mitja Lääperi, MSc<sup>2</sup>  
25

26  
27 8 Mikael Kuitunen, MD, PhD<sup>3</sup>  
28

29  
30 9 Markku Kuisma, MD, PhD<sup>2</sup>  
31

32  
33 10 Heli Salmi, MD, PhD<sup>1,3</sup>  
34  
35  
36 11

37  
38 12 <sup>1</sup>Division of Anaesthesiology; Department of Anaesthesiology, Intensive Care and Pain Medicine; University  
39  
40 of Helsinki and Helsinki University Hospital, P.O. Box 340, FI-00029 HUS, Finland  
41  
42

43  
44 14 <sup>2</sup>Department of Emergency Medicine and Services, Helsinki University and Helsinki University Hospital, P.O.  
45  
46 15 Box 340, FI-00029 HUS, Finland  
47  
48

49 16 <sup>3</sup>New Children's Hospital, University of Helsinki and Helsinki University Hospital, P.O. Box 347, FI-00029  
50  
51 17 HUS, Finland  
52  
53

54 18  
55  
56

57 19 **Corresponding author:**  
58

59  
60 20 Jelena Oulasvirta

1  
2  
3  
4  
5  
6  
7  
8  
9  
10  
11  
12  
13  
14  
15  
16  
17  
18  
19  
20  
21  
22  
23  
24  
25  
26  
27  
28  
29  
30  
31  
32  
33  
34  
35  
36  
37  
38  
39  
40  
41  
42  
43  
44  
45  
46  
47  
48  
49  
50  
51  
52  
53  
54  
55  
56  
57  
58  
59  
60

1

2 **Postal address:** Töölö Hospital, University of Helsinki and Helsinki University Hospital, P.O. Box 266, FI-00029

3 HUS, Finland

4

5 **E-mail:** [jelena.oulasvirta@hus.fi](mailto:jelena.oulasvirta@hus.fi)

6 **Telephone:** +358 50 428 7622

7

8 **Keywords:** emergency medical services, paediatrics, outcome, patient safety, emergency care, COVID-19

9

10 **Word count:** Abstract 253, main text about 2907

Confidential: For Review Only



1  
2  
3 1 **What is already known on this topic**  
4  
5

- 6 2 • Compared to adults, children are less affected by the COVID-19 infection but may be affected by its  
7  
8 3 control measures.  
9  
10 4 • Children may experience collateral damage because of the infection control measures, mainly  
11  
12 5 designed to protect adults.  
13  
14 6 • The pandemic has decreased paediatric emergency department (ED) visits, but it is not clear how or  
15  
16 7 if prehospital care has also been affected.  
17  
18  
19

20 8 **What this study adds**  
21  
22

- 23 9 • The use of prehospital emergency medical services decreased in children after declaration of the  
24  
25 10 state of emergency in Finland.  
26  
27 11 • During the pandemic, ambulance calls for children were more often in the most urgent category  
28  
29 12 and due to trauma. Paradoxically, almost 60% of children were not transported to the ED.  
30  
31 13 • Societal measures targeted to protect adults against the pandemic affected children and their  
32  
33 14 emergency medical care.  
34  
35  
36  
37  
38  
39  
40  
41  
42  
43  
44  
45  
46  
47  
48  
49  
50  
51  
52  
53  
54  
55  
56  
57  
58  
59  
60

1  
2  
3 **1 ABSTRACT**  
4

5  
6 **2 Background**  
7

8  
9 3 Children are less vulnerable to serious forms of the COVID-19 disease. However, concerns have been raised  
10  
11 4 about children being the second victims of the pandemic and its control measures. Therefore, we wanted  
12  
13 5 to study if the pandemic, the infection control measures and their consequences to the society projected to  
14  
15 6 paediatric prehospital emergency medical services (EMS) contacts.  
16  
17

18 **7 Methods**  
19

20  
21 8 We conducted a population-based cohort study concerning all children aged 0-15 years with EMS contacts  
22  
23 9 in the Helsinki University Hospital (HUU) area during 1.3.-31.5.2020 (study period) and equivalent periods  
24  
25 10 in 2017-2019 (control periods). We analysed the demographic characteristics, time of EMS contact, reason  
26  
27 11 for EMS contact, priority of the dispatch, reason for transportation, priority of transportation, if any  
28  
29 12 consultations were made or additional units required, any medication or oxygen or fluids given, if  
30  
31 13 intubation was performed, and whether paramedics took precautions when COVID-19 infection was  
32  
33 14 suspected.  
34  
35  
36  
37

38 **15 Results**  
39

40  
41 16 The number of paediatric EMS contacts decreased by 30.4% from mean of 1794 contacts to 1369 ( $p=0.003$ ).  
42  
43 17 The EMS contacts were more often due to trauma, (+23.7%,  $p<0.05$ ), dispatched in the most urgent  
44  
45 18 category (+139.9%,  $p=0.001$ ), additional help and the mobile intensive care unit (MICU) were more  
46  
47 19 frequently requested (+43.3%,  $p=0.040$  and +46.3%,  $p=0.049$ , respectively). However, EMS contacts  
48  
49 20 resulted less often in ambulance transport (-21.1%,  $p<0.001$ ). Alarming, there were 4 deaths during the  
50  
51 21 study period compared to 0-2 during the control periods.  
52  
53  
54

55 **22 Conclusions**  
56

57  
58 23 The number of EMS contacts decreased during the pandemic. Nevertheless, the children encountered by  
59  
60 24 the EMS were more seriously ill than during the control periods.

## 1 INTRODUCTION

2 Children seem to be less vulnerable to the serious forms of the COVID-19 disease by the new pandemic  
3 coronavirus SARS-CoV-2 than adults (1–3). Still, following the infection control measures and associated  
4 abrupt changes in healthcare delivery, children have not been spared from the health effects of the  
5 pandemic. Consequently, health professionals have expressed concern over children becoming second  
6 victims of the pandemic (4–6).

7 Instructions on social distancing and self-quarantine resulted in a considerable decrease in paediatric  
8 emergency department (ED) visits (4,5). Also, the emergency healthcare itself changed: In EDs and  
9 prehospital emergency medical services (EMS), infection control measures, including the use of personal  
10 protective equipment have slowed patient flows and resulted in modified treatment protocols. On the  
11 other hand, the ubiquitous presence of COVID-19 in news and media may have created a bias in clinicians,  
12 who may be prone to diagnostic errors, suspecting COVID-19 over more common conditions.

13 Decreasing unnecessary paediatric ED visits and ambulance calls has been a priority in paediatric  
14 emergency care already before the pandemic (7–9). However, alarmed by reports stating risks associated  
15 with decreases in paediatric ED visits (4,5) we wanted to study if the pandemic and social distancing  
16 measures were reflected in the amount and features of the EMS contacts with children as well. If these  
17 contacts had indeed substantially decreased, it would be important to analyse whether this change has  
18 taken place at the cost of health risks for children.

## 1           2 3   1   **METHODS**

### 4 5   2   **Study area and population**

6  
7   3   The Helsinki University Hospital (HUH) area in Southern Finland has 1 263 000 inhabitants including 217 000  
8  
9   4   0-15-years-old children (2019) (10) and consists of both urban and suburban regions covering 1 216 km<sup>2</sup>.  
10  
11  
12   5   This study covers all prehospital ambulance responses for children (aged 0-15 years) in the HUH area during  
13  
14   6   the study and control periods.  
15

### 16   7 17 18   8   **Organisation of emergency medical services and healthcare system**

19  
20   9   Finland has a publicly financed universal healthcare system for all residents. The public healthcare  
21  
22   10   exclusively provides all prehospital emergency medical services. All emergency calls go to the governmental  
23  
24   11   emergency response centre (ERC). A professional ERC operator categorises the leading complaint to form  
25  
26   12   a dispatch code and determines a priority class from A (highest risk) to D (lowest risk) according to a formal  
27  
28   13   protocol (11). In HUH area, all prehospital emergencies are responded to by HUH EMS consisting of 36  
29  
30   14   ambulances and three medical supervisor units staffed by emergency medical technicians, paramedics and  
31  
32   15   two physician-staffed units. An emergency physician can be consulted by phone, or, requested on scene.  
33  
34   16   Not all patients encountered by EMS are transported to hospital by ambulance. After on-scene examination  
35  
36   17   and treatment, the EMS personnel may conclude that patient does not need ambulance transport. In that  
37  
38   18   case they must inform the patient or the caregivers on how to observe and treat the condition and on  
39  
40   19   whether or when to contact healthcare services again. The protocol on the treatment and transport of  
41  
42   20   children for the EMS did not change during the pandemic. Nevertheless, preferring other treatment options  
43  
44   21   over nebulised medication, was advised.  
45  
46  
47  
48  
49

50   22  
51  
52   23   There are two 24/7 paediatric ED units with in-patient care in the area. In addition, smaller units offer  
53  
54   24   primary level healthcare during office hours.  
55

### 56   25 57 58   26   **Data collection**

1  
2  
3 1 We retrieved all emergency responses concerning children (age 0-15 y) from the ambulance electronic  
4  
5 2 patient record system (Merlot Medi®, CGI Suomi Oy) in HUH area between 1.3.2020 and 31.5.2020 (study  
6  
7 3 period) and equivalent periods for three previous years: 1.3.2017 - 31.5.2017; 1.3.2018 - 31.5.2018;  
8  
9 4 1.3.2019 - 31.5.2019 (control periods). We chose control periods to cover three previous years and the  
10  
11 5 same months in order to be able to account for any potential seasonal variation. The pandemic declaration  
12  
13 6 by World Health Organisation (WHO) on 11 March, the Finnish Government announcement of the state of  
14  
15 7 emergency in Finland on 16 March, and the reopening of schools on 14 May were included in the study  
16  
17 8 period. We analysed the time of contact, reason for contact, dispatch priority, reason for transportation,  
18  
19 9 priority of transportation, age, sex, native language, whether the patient received medications, oxygen,  
20  
21 10 fluids or was intubated, whether a physician was consulted or requested on-scene or additional units  
22  
23 11 required, and whether COVID-19 was suspected. We investigated eventual laboratory diagnostics for  
24  
25 12 respiratory viruses (including SARS-CoV-2) from the Helsinki University Hospital in-hospital patient record  
26  
27 13 system (Uranus®, CGI Suomi Oy and Apotti®, Epic Systems Corporation). A flow-chart of EMS contacts in  
28  
29 14 2020 and possible suspicion of COVID-19 infection is presented in Supplementary Material 2.  
30  
31  
32  
33  
34  
35  
36  
37  
38

### 37 16 **Statistical analysis**

39 17 Because this is a retrospective study concerning a multidimensional and rapidly progressing medico-societal  
40  
41 18 phenomenon, the possible confounders are multiple and their effects difficult to predict. As we did not aim  
42  
43 19 at establishing causalities between the control measures and EMS contacts, but at noticing possible  
44  
45 20 indicators of the effects of the pandemic on the health and welfare of children, we chose univariate  
46  
47 21 analysis for the primary statistical method, since it gives the clinically most relevant answers to our study  
48  
49 22 questions. Estimates and proportions are shown using medians and interquartile ranges (IQR) and number  
50  
51 23 of events are shown using counts and percentages. To compare the change in EMS contacts during the  
52  
53 24 study period to that of control periods, we used the Mann-Whitney U test or Wilcoxon signed-rank test  
54  
55 25 depending on whether comparisons were made between all the observations or between the weeks of  
56  
57 26 2020 and the previous years. The analyses were performed using R 3.6.3 (12) and the visualisations using  
58  
59  
60

1  
2  
3 1 ggplot2-package (13). We used 0.05 as the level of significance. As the infection control measures changed  
4  
5 2 during the study period, we used line plots with date as the X-axis to evaluate the eventual changes in our  
6  
7 3 parameters.  
8  
9

10 4  
11  
12 5 This study is reported in compliance with the Strengthening the Reporting of Observational Studies in  
13  
14 6 Epidemiology (STROBE) checklist for cohort studies (Supplementary Material 3).  
15  
16

### 17 7 18 8 **Ethical aspects and Patient and Public Involvement statement**

19 9 This is a register-based study approved by the Institutional Review Board of Helsinki University Hospital  
20  
21  
22  
23 10 (§24/2020). No public involvement was planned for this study, as the COVID-19 pandemic advanced  
24  
25 11 rapidly.  
26  
27  
28 12  
29  
30  
31  
32  
33  
34  
35  
36  
37  
38  
39  
40  
41  
42  
43  
44  
45  
46  
47  
48  
49  
50  
51  
52  
53  
54  
55  
56  
57  
58  
59  
60

## 1 RESULTS

2 There were 28 680 prehospital EMS contacts during the study period, of which 1368 (4.8%) concerned  
 3 children. This comprised a reduction of paediatric EMS contacts by 23.7% compared to the mean of 1794  
 4 contacts in control periods (Figure 1). There was no statistically significant variation within the control  
 5 periods (Supplementary Material 1, Supplementary Table 2). Patients were younger: 5.3 years compared to  
 6 6.3 years ( $p<0.001$ ) and there were proportionally less children speaking one of the national languages  
 7 (Finnish or Swedish) as native language: 7.8% ( $p=0.003$ ). The number of EMS calls for children speaking  
 8 another language, however, decreased with a delay. The sex distribution was equal in both periods (males  
 9 54.0% vs. 55.1%).

10  
 11 The changes in the characteristics of EMS dispatch and transportation codes are described in Table 1. The  
 12 proportion of the highest priority A dispatch code rose by 139.9% ( $p=0.001$ ). The absolute number of  
 13 trauma patients decreased by 11.9% ( $p<0.02$ ). However, their proportion increased by 23.7% ( $p<0.05$ ). The  
 14 proportion of non-transported patients increased by 21.1% ( $p<0.001$ ) (Table 1). (Table 1 here)

15  
 16 Additional help and the mobile intensive care unit (MICU) were more frequently requested on-scene  
 17 (+43.3%,  $p=0.040$  and +46.3%,  $p=0.049$ , respectively). Less treatments were performed in 2020 compared to  
 18 the control periods: establishing an intravenous access decreased in proportion by 32.5% ( $p=0.008$ ) and  
 19 administering medications by 35.3% ( $p<0.02$ ) (Table 2). (Table 2 here)

20  
 21 Four patients were dead on arrival of the EMS or died on-scene during the study period, as compared to 0 -  
 22 2 during the control periods (Table 3). (Table 3 here)

23  
 24 **Table 3.** Mortality presented by year during equivalent periods of 1.3.-31.5.

|                                 | 2017 | 2018 | 2019 | 2020 | P-value |
|---------------------------------|------|------|------|------|---------|
| All paediatric EMS contacts (n) | 1722 | 1801 | 1857 | 1364 |         |
| Dead on arrival or on-scene (n) | 2    | 0    | 1    | 4    | 0,060   |

25 EMS = Emergency Medical Services

1  
2  
3  
4  
5  
6  
7  
8  
9  
10  
11  
12  
13  
14  
15  
16  
17  
18  
19  
20  
21  
22  
23  
24  
25  
26  
27  
28  
29  
30  
31  
32  
33  
34  
35  
36  
37  
38  
39  
40  
41  
42  
43  
44  
45  
46  
47  
48  
49  
50  
51  
52  
53  
54  
55  
56  
57  
58  
59  
60

1  
2  
3  
4  
5  
6  
7  
8  
9  
10  
11  
12  
13  
14  
15  
16  
17  
18  
19  
20  
21  
22  
23  
24  
25  
26  
27  
28  
29  
30  
31  
32  
33  
34  
35  
36  
37  
38  
39  
40  
41  
42  
43  
44  
45  
46  
47  
48  
49  
50  
51  
52  
53  
54  
55  
56  
57  
58  
59  
60

1  
2 Of the 1368 children, COVID-19 infection was suspected in 103. Of these, 4 were previously known to be  
3 positive for SARS-CoV-2 and there were 2 new infections. However, 41 of the 1261 children not suspected  
4 as having COVID-19 by the EMS were tested for COVID-19 infection at the ED, with only 1 positive result.

Confidential: For Review Only



## 1 DISCUSSION

2 During a local epidemic peak of the COVID-19 pandemic, prehospital emergency care delivered to children  
3 decreased and its characteristics changed markedly. Emergency calls for children were more often  
4 categorised as urgent and an emergency medical physician or other additional help were more often  
5 needed. Concomitantly, the number of prehospital paediatric deaths during the pandemic was noteworthy.  
6 Therefore, our results suggest that the children encountered by the EMS during the pandemic were more  
7 seriously ill than before the pandemic. Paradoxically, the EMS contacts more likely led to not transporting  
8 the child to the ED (Table 1).

9  
10 Finland has not experienced high COVID-19 infection rates in the population so far. The highest demand for  
11 hospital beds and intensive care was experienced mid-April (14). Thus, the changes we noticed in the  
12 emergency healthcare to children were neither due to SARS CoV-2, nor to an overwhelming of the  
13 emergency healthcare system. Instead, they represent the changes in healthcare functionality, and in the  
14 behaviour of families with children.

15  
16 We expected the decrease in the number of EMS contacts for children based on international reports about  
17 substantial decreases in the number of paediatric ED visits during the pandemic (15,16). Our figures were  
18 also congruent with those from the paediatric EDs in the area, which saw a 45% decrease in the number of  
19 visits after the beginning of the infection control measures, according to the hospital statistical data. The  
20 EMS contacts with children started to decrease immediately after the declaration of state of emergency,  
21 suggesting that the decrease was more societal than medical in nature.

22  
23 The decrease in EMS contacts was probably due to several factors, which may represent both positive  
24 changes in the behaviour of caregivers, but also cause unnecessary risks to children. A successful public

1  
2  
3 1 guidance during the state of emergency, encouraging parents to treat mild symptoms at home and avoid  
4  
5 2 overcrowding EDs, could have eliminated some medically unjustifiable EMS contacts (9,17). In addition,  
6  
7 3 infection control measures could have decreased the occurrence of acute infections in children and, hence,  
8  
9 4 the occurrence of febrile seizures and dyspnoea, which are leading causes for paediatric EMS calls under  
10  
11 5 normal circumstances (18). Still, especially the peak in the number of children who died on-  
12  
13 6 scene warrants careful examination of the EMS contacts during the pandemic. Even if the increase  
14  
15 7 in deaths is a preliminary finding and as such may be due to coincidence, we cannot confidently state that  
16  
17 8 the decrease in EMS contacts was a positive proceeding. The ubiquitous presence of COVID-19 in media,  
18  
19 9 reports about overcrowded EDs and a concomitant public guidance stating that all unnecessary contacts  
20  
21 10 should be avoided, could have led to caregivers delaying ED visits and emergency calls even when medical  
22  
23 11 attention would urgently have been needed. Noticeably, a recent report from adult EMS contacts in the UK  
24  
25 12 states that the pandemic did not cause reluctance to call an ambulance in case of a real emergency, such as  
26  
27 13 stroke or heart attack (19).  
28  
29  
30  
31  
32  
33  
34  
35

36 15 Our results suggest that the children encountered by the EMS during the pandemic were more seriously ill  
37  
38 16 than during the control periods. Although the total number of EMS contacts decreased, the number of the  
39  
40 17 most urgent EMS calls with priority class A increased. Simultaneously, the proportions of contacts requiring  
41  
42 18 an emergency medical physician or other additional help increased. There were no changes in the EMS  
43  
44 19 protocols that could account for such finding. The high number of paediatric out-of-hospital deaths may  
45  
46 20 also be related to this notice.  
47  
48  
49  
50  
51  
52

53 22 Even though children encountered by the EMS during the pandemic seem to have been more seriously ill  
54  
55 23 than before, the contacts more often led to not transporting the child to the ED. The increase in the  
56  
57 24 proportion of EMS calls in which the patient was not transported in an ambulance (“non-transport”) is  
58  
59 25 interesting, as in our system the non-transport rates were already high before pandemic (18,20). This  
60

1  
2  
3 1 finding is also paradoxical considering that non-urgent or non-medical complaints did not seem  
4  
5 2 overexpressed during the study period. The increased tendency not to transport a child by ambulance may  
6  
7 3 reflect the practical difficulties imposed by the infection control measures during the pandemic, such as a  
8  
9 4 time-consuming obligation to thoroughly clean the ambulance after any transport. Also, non-transport  
10  
11 5 decisions are not solely based on medical decision-making, but social and logistic issues are considered as  
12  
13 6 well. In our urban study area other transport possibilities than ambulance, are easily available. During the  
14  
15 7 pandemic, caregivers for older children were not allowed to escort the child in an ambulance. Thus, it is  
16  
17 8 likely that if the ambulance transport was medically not necessary and if the caregiver needed to use  
18  
19 9 another means of transport anyway, the child may have preferred the ride with the caregiver. In addition,  
20  
21 10 similarly to laypersons, the EMS personnel were also exposed to media warning about overcrowded EDs  
22  
23 11 and reporting about overwhelmed healthcare systems. Even without changes in protocols, the EMS  
24  
25 12 personnel may have felt a need to ascertain that a maximal number of units are available at all times for  
26  
27 13 urgent cases, and, opted not to transport when there was no explicit need for ambulance transportation.  
28  
29  
30  
31  
32  
33  
34  
35

36 15 We observed a decrease in the absolute rate of traumas, but non-traumatic emergencies decreased even  
37  
38 16 more. This is interesting, as we hypothesised that the decrease in EMS dispatches during the pandemic  
39  
40 17 would have been most pronounced for traumas. After all, due to social distancing, children had less school  
41  
42 18 and sport activities and transports in motor vehicles. Under normal circumstances, these factors are major  
43  
44 19 contributors for paediatric traumas (21). On the other hand, even if schools and activities were closed,  
45  
46 20 playgrounds and other public outdoor areas remained open; thus, offering more unsupervised outside  
47  
48 21 playing time. These changes from normal routines may have contributed to unpredicted new risks for  
49  
50 22 traumas in children.  
51  
52  
53  
54  
55  
56

57 24 We found that the number of EMS calls for children speaking other language than the national languages  
58  
59 25 (Finnish or Swedish) decreased similarly to other contacts but with a delay. In Finland, native language can

1  
2  
3  
4  
5  
6  
7  
8  
9  
10  
11  
12  
13  
14  
15  
16  
17  
18  
19  
20  
21  
22  
23  
24  
25  
26  
27  
28  
29  
30  
31  
32  
33  
34  
35  
36  
37  
38  
39  
40  
41  
42  
43  
44  
45  
46  
47  
48  
49  
50  
51  
52  
53  
54  
55  
56  
57  
58  
59  
60

1 be used as a proxy for recent immigrant background. Interestingly, several reports have addressed the  
2 vulnerability of ethnic minority groups to COVID-19 (22,23). Our results suggest that language and  
3 immigrant background may play a role: the information took more time to reach subpopulations with  
4 deficiencies in language skills and poor knowledge of the healthcare system. Consequently, in possible new  
5 pandemic waves, more attention should be paid to efficiently spreading accurate information in different  
6 languages and formats.

7  
8 To evaluate if changes were specifically encountered by families with children, we also compared our  
9 findings to those in the total HUH population. In our area, EMS calls for adults also decreased by 11.1 % ( $p =$   
10 0.004) during the pandemic; but, in contrast to children, the absolute number of their most urgent contacts  
11 also decreased by 17.1 % ( $p = 0.004$ ), and there was no increase in the on-scene mortality. In addition, the  
12 decrease in adult EMS contacts occurred already before the declaration of the state of emergency. The  
13 pattern for children is clearly different, which strengthens the concern raised by recent reports suggesting  
14 that children may have had to bear the burden of the restrictions of the COVID-19 pandemic differently to  
15 adults – even to the extent of becoming the “collateral damage” of the pandemic (6). Taken together, these  
16 findings suggest that in adults, behavioural changes (i.e., decrease in risk behaviours following social  
17 distancing, reluctance to contact medical care etc.) were responsible for most of the decrease in EMS  
18 contacts; and that, in contrast to children, the protective measures were truly protective for adults,  
19 decreasing the occurrence of severe acute illnesses and injuries. It remains to be solved how, in future  
20 pandemics, children could be protected from the negative impacts of measures designed to protect adults.

21  
22 To protect the EMS and ED personnel from infections, and to optimise the use of critical resources, it would  
23 be crucial to be able to recognise children with probable or possible COVID-19. We found that calibration  
24 still needs to be done – in about half of the patients where EMS personnel suspected COVID-19, no COVID-  
25 19 tests were performed at the ED. On the other hand, only 41 of the 1261 patients in whom EMS

1  
2  
3 1 personnel did not suspect COVID-19 infections, were tested for COVID-19 with one positive result. This  
4  
5 2 implies that more explicit instructions for EMS personnel are needed (24).  
6  
7  
8  
9

10  
11 4 Our study has several limitations. First, it is a single-centre study. Second, because of the rapid advance of  
12  
13 5 the COVID-19 pandemic, this study is retrospective. We tried to address the lack of historic references and  
14  
15 6 the question about possible pre-existing seasonal variation by comparing the data to equivalent periods of  
16  
17 7 three previous years. Finally, mortality is such a rare event that no statistical conclusions can be drawn  
18  
19 8 based on our data. However, we believe that this finding needs to be disclosed.  
20  
21  
22  
23  
24  
25

26 10 The pandemic created exceptional circumstances with rapid changes in the behaviour of families with  
27  
28 11 children and the functionality of emergency healthcare. During recent pandemics, e.g. the H1N1 influenza  
29  
30 12 in 2009, school closure and social distancing measures were never extended to children in a similar way  
31  
32 13 (25). In our area, the setting was particularly interesting, as the prevalence of COVID-19 in the population  
33  
34 14 remained low throughout the epidemic (14). Thus, our results may be generalisable to other similar  
35  
36 15 situations of unexpected quick changes in the healthcare.  
37  
38  
39  
40  
41  
42

## 43 17 **CONCLUSIONS**

44  
45  
46 18 The total number of contacts decreased rapidly during the COVID-19 pandemic. Also, the children  
47  
48 19 encountered by the EMS were more seriously ill, and we registered a noteworthy number of prehospital  
49  
50 20 deaths compared to the control periods. Our results highlight the need to consider secondary effects of the  
51  
52 21 pandemic and the control measures also on other populations than those originally targeted.  
53  
54  
55  
56  
57  
58  
59  
60

1  
2  
3 1 **A funding statement:**  
4

5  
6 2 This study received a grant from The Finnish Medical Society Duodecim. The Society had no role in the  
7  
8 3 study design, collection, analysis or interpretation of data; in the writing of the manuscript, or in the  
9  
10 4 decision to submit the manuscript for publication.  
11

12  
13 5  
14  
15 6 **A competing interests statement:**  
16

17 7 Authors do not have competing interests.  
18  
19 8  
20

21  
22 9 **Contributions:**  
23

24 10 JO, HS, MaK, HHR conceptualised and designed the study, carried out the initial analyses, drafted the initial  
25  
26 11 manuscript, and reviewed and revised the manuscript. JO, HS, HHR and JP collected the data. JP and MiK  
27  
28 12 participated in the design of the study, reviewed the initial data collection and initial analyses, and critically  
29  
30 13 reviewed and revised the manuscript. ML designed the data analysis instruments, coordinated and  
31  
32 14 supervised data analysis, and critically reviewed the manuscript. All authors approved the final manuscript  
33  
34 15 as submitted and agreed to be accountable for all aspects of the work.  
35  
36 16  
37  
38

39 17 **Any checklist and flow diagram for the appropriate reporting statement,**  
40

41 18 STROBE, please see Supplementary Materials.  
42  
43 19  
44

45  
46 20 **Patient consent form:**  
47

48 21 Not applicable.  
49  
50  
51 22

52  
53 23 **Data availability statement:**  
54

55 24 Data are available upon reasonable request.  
56  
57 25  
58  
59 26  
60

1  
2  
3 **1 FIGURE LEGENDS:**  
4

5 **2 Figure 1:** Basic information on paediatric EMS contacts in 2020 compared to equivalent periods in 2017-  
6  
7 2019.  
8

9  
10 **4 a)** A number of weekly EMS contacts

11  
12 **5 b)** A timeline of the course of the first pandemic wave and number of weekly EMS contacts.

- 13  
14 **6** 1. World Health Organization declared the pandemic, 11 March 2020
- 15  
16 **7** 2. Public social gatherings were limited to a maximum of 500 participants, 15 March 2020
- 17  
18 **8** 3. The government announced the state of emergency, 16 March 2020
- 19  
20  
21 **9** 4. National restrictions and social distancing launched. Schools closed, 18 March 2020
- 22  
23 **10** 5. Launching strict national border control, 19 March 2020
- 24  
25 **11** 6. Isolation of Southern Finland started, 28, March 2020
- 26  
27 **12** 7. Isolation of Southern Finland ended, 15 April 2020
- 28  
29  
30 **13** 8. Schools reopened, 14 May 2020

31  
32 **14** EMS = Emergency Medical Services  
33

34  
35  
36 **16 ORCID ID**

37  
38  
39 **17** Jelena Oulasvirta <https://orcid.org/0000-0001-6750-4615>  
40  
41  
42  
43  
44  
45  
46  
47  
48  
49  
50  
51  
52  
53  
54  
55  
56  
57  
58  
59  
60

1  
2  
3  
4  
5  
6  
7  
8  
9  
10  
11  
12  
13  
14  
15  
16  
17  
18  
19  
20  
21  
22  
23  
24  
25  
26  
27  
28  
29  
30  
31  
32  
33  
34  
35  
36  
37  
38  
39  
40  
41  
42  
43  
44  
45  
46  
47  
48  
49  
50  
51  
52  
53  
54  
55  
56  
57  
58  
59  
60**REFERENCES:**

1. Lu X, Zhang L, Du H, et al. SARS-CoV-2 Infection in Children. *N Engl J Med*. 2020 Apr 23;382(17):1663–5.
2. Castagnoli R, Votto M, Licari A, et al. Severe Acute Respiratory Syndrome Coronavirus 2 (SARS-CoV-2) Infection in Children and Adolescents. *JAMA Pediatr*. 2020 Apr 22;
3. Parri N, Lenge M, Buonsenso D. Children with Covid-19 in Pediatric Emergency Departments in Italy. *N Engl J Med*. 2020 May 1;NEJMc2007617.
4. Lazzarini M, Barbi E, Apicella A, et al. Delayed access or provision of care in Italy resulting from fear of COVID-19. *Lancet Child Adolesc Heal*. 2020 May 1;4(5):e10–1.
5. Green P. Risks to children and young people during covid-19 pandemic. *BMJ*. 2020 Apr 28;369:m1669.
6. Crawley E, Loades M, Feder G, et al. Wider collateral damage to children in the UK because of the social distancing measures designed to reduce the impact of COVID-19 in adults. *BMJ Paediatr Open*. 2020 May 4;4(1):e000701.
7. Poku BA, Hemingway P. Reducing repeat paediatric emergency department attendance for non-urgent care: a systematic review of the effectiveness of interventions. *Emerg Med J*. 2019 Jun 21;36(7):emermed-2018-207536.
8. Pearson C, Kim DS, Mika VH, et al. Emergency department visits in patients with low acuity conditions: Factors associated with resource utilization. *Am J Emerg Med*. 2018 Aug 13;36(8):1327–31.
9. Farion KJ, Wright M, Zemek R, et al. Understanding Low-Acuity Visits to the Pediatric Emergency Department. Eckle T, editor. *PLoS One*. 2015 Jun 17;10(6):e0128927.
10. Finnish Official Statistics - Suomen virallinen tilasto (SVT): Väestörakenne [web page]. ISSN=1797-



- 1  
2  
3 1 5379. Helsinki: Tilastokeskus [accessed: 16.6.2020]. <http://www.stat.fi/til/vaerak/index.html>. 2019.
- 4  
5  
6 2 11. Hoikka M, Länkimäki S, Silfvast T, et al. Medical priority dispatch codes—comparison with National  
7  
8 3 Early Warning Score. *Scand J Trauma Resusc Emerg Med*. 2016 Dec 3;24(1):142.
- 9  
10  
11 4 12. R Core Team (2020). R: A language and environment for statistical computing. R Foundation for  
12  
13 5 Statistical Computing, Vienna, Austria. 2020.
- 14  
15  
16 6 13. Wickham H. *ggplot2: Elegant Graphics for Data Analysis*. Cham: Springer International Publishing;  
17  
18 7 2016. (Use R!).
- 19  
20  
21 8 14. Situation update on coronavirus - Infectious diseases and vaccinations - Finnish Institute for Health  
22  
23 9 and Welfare [Internet]. [cited 2020 Jul 12]. Available from: [https://thl.fi/en/web/infectious-diseases-](https://thl.fi/en/web/infectious-diseases-and-vaccinations/what-s-new/coronavirus-covid-19-latest-updates/situation-update-on-coronavirus)  
24  
25 10 [and-vaccinations/what-s-new/coronavirus-covid-19-latest-updates/situation-update-on-coronavirus](https://thl.fi/en/web/infectious-diseases-and-vaccinations/what-s-new/coronavirus-covid-19-latest-updates/situation-update-on-coronavirus)  
26  
27  
28  
29 11 15. Scaramuzza A, Tagliaferri F, Bonetti L, et al. Changing admission patterns in paediatric emergency  
30  
31 12 departments during the COVID-19 pandemic. *Arch Dis Child*. 2020 Jul;105(7):704.2-706.
- 32  
33  
34 13 16. Isba R, Edge R, Jenner R, et al. Where have all the children gone? Decreases in paediatric emergency  
35  
36 14 department attendances at the start of the COVID-19 pandemic of 2020. *Arch Dis Child*.  
37  
38 15 2020;105(7):2020.
- 39  
40  
41 16 17. Morgan SR, Chang AM, Alqatari M, et al. Non-Emergency Department Interventions to Reduce ED  
42  
43 17 Utilization: A Systematic Review. Zehtabchi S, editor. *Acad Emerg Med*. 2013 Oct;20(10):969–85.
- 44  
45  
46 18 18. Harve H, Salmi H, Rahiala E, et al. Out-of-hospital paediatric emergencies: a prospective, population-  
47  
48 19 based study. *Acta Anaesthesiol Scand*. 2016 Mar;60(3):360–9.
- 49  
50  
51 20 19. Holmes JL, Brake S, Docherty M, et al. Emergency ambulance services for heart attack and stroke  
52  
53 21 during UK's COVID-19 lockdown. *Lancet*. 2020 May;395(10237):e93–4.
- 54  
55  
56 22 20. Oulasvirta J, Salmi H, Kuisma M, et al. Outcomes in children evaluated but not transported by  
57  
58 23 ambulance personnel: retrospective cohort study. *BMJ Paediatr Open*. 2019 Oct 23;3(1):e000523.
- 59  
60

- 1  
2  
3 1 21. Listo I, Salmi H, Hästbacka M, et al. Pediatric traumas and neighborhood socioeconomic  
4  
5 2 characteristics: A population based study. *J Pediatr Surg*. 2020 Jun;  
6  
7  
8 3 22. Williamson EJ, Walker AJ, Bhaskaran K, et al. OpenSAFELY: factors associated with COVID-19 death  
9  
10 4 in 17 million patients. *Nature*. 2020 Jul 8;  
11  
12  
13 5 23. Pan D, Sze S, Minhas JS, et al. The impact of ethnicity on clinical outcomes in COVID-19: A systematic  
14  
15 6 review. *EClinicalMedicine*. 2020 Jun;23:100404.  
16  
17  
18 7 24. Lemoine S, Chabernaud J-L, Travers S, et al. COVID-19 in pediatric patients: What the prehospital  
19  
20 8 teams need to know. *Arch Pédiatrie*. 2020 Jul;27(5):281–2.  
21  
22  
23 9 25. Jhaveri R. Echoes of 2009 H1N1 Influenza Pandemic in the COVID Pandemic. *Clin Ther*. 2020  
24  
25 10 May;42(5):736–40.  
26  
27  
28  
29 11  
30  
31  
32  
33  
34  
35  
36  
37  
38  
39  
40  
41  
42  
43  
44  
45  
46  
47  
48  
49  
50  
51  
52  
53  
54  
55  
56  
57  
58  
59  
60

**1 Table 1.** Change in the dispatch and transportation codes.

|                            |                         | Mean 2017-2019        | 2020                  | change                   | P-value          |
|----------------------------|-------------------------|-----------------------|-----------------------|--------------------------|------------------|
| All EMS contacts           | all n (%)               | 1794.3 (100.0%)       | 1368 (100.0%)         |                          |                  |
|                            | n per week median (IQR) | 137.7 (130.7 - 142.0) | 91.0 (86.0 - 132.0)   | -30.4% (-36.6% - -12.8%) | <b>0,003</b>     |
| Dispatch priority A*       | all n (%)               | 55.3 (3.1%)           | 90 (6.6%)             |                          |                  |
|                            | n per week median (IQR) | 3.7 (3.3 - 3.7)       | 8.0 (7.0 - 8.0)       | 90.9% (36.4% - 140.0%)   | <b>0,031</b>     |
|                            | % per week median (IQR) | 2.7% (2.4% - 2.8%)    | 6.1% (5.7% - 8.4%)    | 139.9% (116.7 - 175.9%)  | <b>0,001</b>     |
| Dispatch priority B*       | all n (%)               | 690.7 (38.5%)         | 478 (34.9%)           |                          |                  |
|                            | n per week median (IQR) | 51.7 (50.3 - 55.7)    | 37.0 (30.0 - 43.0)    | -29.0% (-42.3% - -20.7%) | <b>0,002</b>     |
|                            | % per week median (IQR) | 38.2% (36.7% - 40.5%) | 36.1% (31.5% - 38.1%) | -8.7% (-15.9 - -2.3%)    | <b>0,027</b>     |
| Dispatch priority C*       | all n (%)               | 932.7 (52.0%)         | 658 (48.1%)           |                          |                  |
|                            | n per week median (IQR) | 71.3 (67.3 - 74.0)    | 44.0 (43.0 - 57.0)    | -34.7% (-41.8% - -23.3%) | <b>0,001</b>     |
|                            | % per week median (IQR) | 52.1% (50.5% - 53.7%) | 49.4% (45.7% - 51.4%) | -6.7% (-9.1 - -4.1%)     | <b>0,048</b>     |
| Dispatch priority D*       | all n (%)               | 115.7 (6.4%)          | 143 (10.4%)           |                          |                  |
|                            | n per week median (IQR) | 8.3 (7.3 - 11.0)      | 10.0 (8.0 - 12.0)     | 12.5% (-11.8% - 60.0%)   | 0,235            |
|                            | % per week median (IQR) | 6.5% (5.2% - 7.9%)    | 9.5% (8.1% - 11.4%)   | 65.0% (38.9 - 83.6%)     | <b>0,001</b>     |
| Transported patients       | all n (%)               | 927.3 (51.7%)         | 578 (42.3%)           |                          |                  |
|                            | n per week median (IQR) | 73.0 (67.0 - 74.7)    | 36.0 (34.0 - 54.0)    | -49.1% (-52.0% - -27.7%) | <b>0,002</b>     |
|                            | % per week median (IQR) | 52.2% (51.4% - 52.9%) | 41.9% (39.1% - 44.8%) | -19.5% (-27.0 - -13.4%)  | <b>&lt;0,001</b> |
| Transportation priority A* | all n (%)               | 12.3 (0.7%)           | 6 (0.4%)              |                          |                  |
|                            | n per week median (IQR) | 1.0 (0.8 - 1.0)       | 1.0 (1.0 - 1.0)       | 50.0% (0.0% - 50.0%)     | 0,174            |
|                            | % per week median (IQR) | 0.7% (0.5% - 0.8%)    | 1.2% (0.9% - 1.2%)    | 107.2% (52.4 - 381.5%)   | <b>0,031</b>     |
| Transportation priority B* | all n (%)               | 92.3 (5.1%)           | 62 (4.5%)             |                          |                  |
|                            | n per week median (IQR) | 7.0 (5.3 - 8.0)       | 5.0 (3.0 - 5.0)       | -34.8% (-51.6% - -28.6%) | <b>0,004</b>     |
|                            | % per week median (IQR) | 5.4% (4.4% - 5.6%)    | 5.0% (3.5% - 5.7%)    | -15.0% (-31.8 - 4.0%)    | 0,168            |
| Transportation priority C* | all n (%)               | 602.0 (33.6%)         | 398 (29.2%)           |                          |                  |
|                            | n per week median (IQR) | 45.3 (43.0 - 48.3)    | 25.0 (22.0 - 41.0)    | -40.0% (-48.4% - -11.0%) | <b>&lt;0,001</b> |
|                            | % per week median (IQR) | 33.2% (31.9% - 34.5%) | 29.1% (25.6% - 31.2%) | -8.8% (-24.2 - -2.0%)    | <b>0,005</b>     |
| Transportation priority D* | all n (%)               | 220.3 (12.3%)         | 113 (8.3%)            |                          |                  |
|                            | n per week median (IQR) | 16.3 (15.0 - 18.0)    | 7.0 (6.0 - 9.0)       | -60.9% (-63.3% - -45.0%) | <b>0,002</b>     |
|                            | % per week median (IQR) | 11.8% (11.6% - 13.0%) | 7.4% (6.6% - 8.6%)    | -37.7% (-46.2 - -27.2%)  | <b>0,001</b>     |
| Trauma patients            | all n (%)               | 606.0 (33.8%)         | 504 (36.8%)           |                          |                  |
|                            | n per week median (IQR) | 45.3 (39.0 - 51.3)    | 36.0 (31.0 - 41.0)    | -11.9% (-24.5% - -9.6%)  | <b>0,011</b>     |
|                            | % per week median (IQR) | 32.7% (29.6% - 37.1%) | 39.0% (33.3% - 41.7%) | 23.7% (-7.1 - 28.1%)     | <b>0,048</b>     |
| Non-transported patients   | all n (%)               | 866.0 (48.3%)         | 786 (57.6%)           |                          |                  |
|                            | n per week median (IQR) | 66.3 (64.0 - 68.3)    | 56.0 (50.0 - 68.0)    | -7.8% (-26.8% - 0.0%)    | <b>0,108</b>     |
|                            | % per week median (IQR) | 47.8% (47.1% - 48.7%) | 58.1% (55.2% - 60.9%) | 21.1% (15.0 - 28.4%)     | <b>&lt;0,001</b> |

\* the priority class from A to D refers to the urgency of the dispatch /transportation and /or to the risk of the symptom to a patient – A being the contact with highest urgency and risk and D the lowest urgency and risk

EMS = Emergency Medical Services

IQR = Interquartile Range

7

1 **Table 2.** Change in the additional units requested and interventions performed on-scene

|                                        |                         | Mean 2017-2019        | 2020                  | change                   | P-value      |
|----------------------------------------|-------------------------|-----------------------|-----------------------|--------------------------|--------------|
| additional help requested              | all n (%)               | 86.7 (4.8%)           | 94 (6.9%)             |                          |              |
|                                        | n per week median (IQR) | 6.3 (5.3 - 7.7)       | 7.0 (5.0 - 9.0)       | 23.5% (-29.4% - 31.3%)   | 0,529        |
|                                        | % per week median (IQR) | 4.6% (4.0% - 5.6%)    | 6.8% (4.5% - 8.5%)    | 43.3% (0.7 - 117.7%)     | <b>0,040</b> |
| MICU on-scene                          | all n (%)               | 26.0 (1.4%)           | 24 (1.8%)             |                          |              |
|                                        | n per week median (IQR) | 1.7 (1.3 - 2.3)       | 2.0 (2.0 - 2.8)       | 0.0% (-13.2% - 50.0%)    | 0,435        |
|                                        | % per week median (IQR) | 1.3% (0.9% - 1.7%)    | 2.3% (1.4% - 2.5%)    | 46.3% (-1.4 - 100.5%)    | <b>0,049</b> |
| emergency physician consulted by phone | all n (%)               | 291.3 (16.2%)         | 236 (17.2%)           |                          |              |
|                                        | n per week median (IQR) | 21.7 (21.3 - 23.0)    | 18.0 (15.0 - 20.0)    | -28.4% (-36.3% - -1.7%)  | <b>0,023</b> |
|                                        | % per week median (IQR) | 16.1% (15.3% - 17.1%) | 17.6% (15.6% - 18.1%) | 2.7% (-4.6 - 19.6%)      | 0,588        |
| any measurements done on-scene         | all n (%)               | 1693.0 (94.4%)        | 1280 (93.5%)          |                          |              |
|                                        | n per week median (IQR) | 129.0 (124.0 - 134.3) | 88.0 (78.0 - 124.0)   | -29.0% (-37.6% - -12.3%) | <b>0,001</b> |
|                                        | % per week median (IQR) | 94.6% (94.0% - 94.9%) | 93.9% (91.9% - 95.3%) | -0.0% (-2.2 - 1.6%)      | 0,455        |
| intubation*                            | all n (%)               | 2.0 (0.1%)            | 3 (0.2%)              |                          |              |
|                                        | n per week median (IQR) | 0.3 (0.3 - 0.3)       | 1.5 (1.2 - 1.8)       |                          |              |
|                                        | % per week median (IQR) | 0.2% (0.1% - 0.2%)    | 1.3% (1.2% - 1.3%)    |                          |              |
| supplementary oxygen given             | all n (%)               | 41.7 (2.3%)           | 16 (1.2%)             |                          |              |
|                                        | n per week median (IQR) | 3.0 (2.3 - 3.7)       | 2.0 (1.0 - 2.2)       | -39.4% (-51.8% - 12.5%)  | 0,306        |
|                                        | % per week median (IQR) | 1.9% (1.7% - 2.5%)    | 1.5% (1.2% - 2.4%)    | -19.3% (-33.8 - 17.2%)   | 0,742        |
| intravenous connection established     | all n (%)               | 133.3 (7.4%)          | 65 (4.7%)             |                          |              |
|                                        | n per week median (IQR) | 10.7 (8.3 - 12.3)     | 5.0 (3.0 - 7.0)       | -52.6% (-70.7% - -30.8%) | <b>0,003</b> |
|                                        | % per week median (IQR) | 7.6% (5.9% - 9.0%)    | 4.4% (2.9% - 5.8%)    | -32.5% (-56.8 - -24.9%)  | <b>0,008</b> |
| any medication given                   | all n (%)               | 195.0 (10.9%)         | 111 (8.1%)            |                          |              |
|                                        | n per week median (IQR) | 14.3 (12.3 - 15.3)    | 7.0 (6.0 - 9.0)       | -44.7% (-63.6% - -37.9%) | <b>0,001</b> |
|                                        | % per week median (IQR) | 10.3% (8.9% - 11.9%)  | 7.6% (6.6% - 9.1%)    | -35.3% (-44.2 - -12.9%)  | <b>0,013</b> |

2 \* not enough data for calculating difference in intubation rates

3 \*\* invasive means any intravenous or intranasal or intramuscular or intraosseal medication given

4 MICU = mobile intensive care unit

5

1  
2  
3 **1 Supplementary Materials:**  
4  
5

- 6 2 1. Statistics on EMS contacts  
7  
8 3 2. A flow-chart of EMS contacts in 2020 and possible suspicion of COVID-19 infection  
9

10 4 EMS = Emergency Medical Services  
11

12 5 ED = Emergency Department  
13

14 6 resp infection = respiratory infection  
15

- 16  
17 7 3. A Strengthening the Reporting of Observational Studies in Epidemiology (STROBE)  
18  
19 8 checklist for cohort studies  
20  
21  
22 9  
23  
24  
25  
26  
27  
28  
29  
30  
31  
32  
33  
34  
35  
36  
37  
38  
39  
40  
41  
42  
43  
44  
45  
46  
47  
48  
49  
50  
51  
52  
53  
54  
55  
56  
57  
58  
59  
60

1  
2  
3  
4  
5  
6  
7  
8  
9  
10  
11  
12  
13  
14  
15  
16  
17  
18  
19  
20  
21  
22  
23  
24  
25  
26  
27  
28  
29  
30  
31  
32  
33  
34  
35  
36  
37  
38  
39  
40  
41  
42  
43  
44  
45  
46  
47  
48  
49  
50  
51  
52  
53  
54  
55  
56  
57  
58  
59  
60



1  
2  
3 **1 Supplementary Material 1: Supplementary statistics**

4  
5  
6 **2**

3 **Supplementary Table 1. Descriptive statistics.**

|                                      |                         | 2017                  | 2018                  | 2019                  | 2020                  |
|--------------------------------------|-------------------------|-----------------------|-----------------------|-----------------------|-----------------------|
| Age (years)                          |                         | 6.4<br>(2.0 - 13.2)   | 6.5<br>(1.9 - 12.6)   | 6.3<br>(2.1 - 12.5)   | 5.3<br>(1.8 - 12.0)   |
| Sex (male)                           | all n (%)               | 915 (53.2%)           | 980 (54.6%)           | 1001 (54.1%)          | 753 (55.1%)           |
|                                      | n per week median (IQR) | 67.0 (61.0 - 82.0)    | 75.0 (65.0 - 80.0)    | 76.0 (71.0 - 80.0)    | 53.0 (48.0 - 70.0)    |
|                                      | % per week median (IQR) | 55.3% (51.7% - 55.6%) | 55.2% (53.7% - 56.1%) | 52.3% (51.8% - 58.3%) | 54.3% (52.7% - 56.2%) |
| Native language (Finnish or Swedish) | all n (%)               | 1327 (81.8%)          | 1310 (77.7%)          | 1377 (79.1%)          | 991 (74.7%)           |
|                                      | n per week median (IQR) | 104.0 (91.0 - 109.0)  | 104.0 (91.0 - 106.0)  | 102.0 (95.0 - 110.0)  | 69.0 (66.0 - 91.0)    |
|                                      | % per week median (IQR) | 82.6% (78.8% - 84.8%) | 77.5% (76.3% - 79.1%) | 79.7% (76.8% - 80.7%) | 72.8% (71.8% - 78.4%) |

4 IQR = Interquartile Range

5

6

1  
2  
3 1 **Supplementary Table 2.** The number of EMS contacts during the control periods for each month and  
4 2 their proportions (%) of all control-period EMS contacts. The Chi-squared test was used to calculate the  
5 3 significance of the variation within the control periods.  
6 4  
7  
8

9  
10  
11  
12  
13  
14 5

| Year | March     | April     | June      | p    |
|------|-----------|-----------|-----------|------|
| 2017 | 602 (11%) | 516 (10%) | 606 (11%) | 0,10 |
| 2018 | 621 (12%) | 524 (10%) | 656 (12%) |      |
| 2019 | 643 (12%) | 606 (11%) | 609 (11%) |      |

15  
16  
17  
18  
19  
20  
21  
22  
23  
24  
25  
26  
27  
28  
29  
30  
31  
32  
33  
34  
35  
36  
37  
38  
39  
40  
41  
42  
43  
44  
45  
46  
47  
48  
49  
50  
51  
52  
53  
54  
55  
56  
57  
58  
59  
60



**1 Supplementary Table 3. Change in the dispatch and transportation codes.**

|                            |                         | 2017                  | 2018                  | 2019                  | 2020                  |
|----------------------------|-------------------------|-----------------------|-----------------------|-----------------------|-----------------------|
| All EMS contacts           | all n (%)               | 1724 (100.0%)         | 1801 (100.0%)         | 1858 (100.0%)         | 1369 (100.0%)         |
|                            | n per week median (IQR) | 128.0 (122.0 - 140.0) | 142.0 (125.0 - 146.0) | 142.0 (130.0 - 152.0) | 91.0 (86.0 - 132.0)   |
| Dispatch priority A*       | all n (%)               | 42 (2.4%)             | 43 (2.4%)             | 81 (4.4%)             | 90 (6.6%)             |
|                            | n per week median (IQR) | 3.0 (2.0 - 4.0)       | 3.0 (2.0 - 4.0)       | 5.0 (2.0 - 5.0)       | 8.0 (7.0 - 8.0)       |
|                            | % per week median (IQR) | 2.3% (1.6% - 2.6%)    | 2.1% (1.6% - 2.9%)    | 3.3% (1.6% - 4.1%)    | 6.1% (5.7% - 8.4%)    |
| Dispatch priority B*       | all n (%)               | 693 (40.2%)           | 677 (37.6%)           | 702 (37.8%)           | 478 (34.9%)           |
|                            | n per week median (IQR) | 53.0 (47.0 - 58.0)    | 49.0 (46.0 - 53.0)    | 53.0 (46.0 - 59.0)    | 37.0 (30.0 - 43.0)    |
|                            | % per week median (IQR) | 38.8% (37.3% - 42.3%) | 39.0% (32.4% - 40.4%) | 38.7% (34.4% - 40.7%) | 36.1% (31.5% - 38.1%) |
| Dispatch priority C*       | all n (%)               | 882 (51.2%)           | 969 (53.8%)           | 947 (51.0%)           | 658 (48.1%)           |
|                            | n per week median (IQR) | 65.0 (63.0 - 70.0)    | 74.0 (69.0 - 86.0)    | 72.0 (69.0 - 80.0)    | 44.0 (43.0 - 57.0)    |
|                            | % per week median (IQR) | 52.1% (50.4% - 54.3%) | 54.0% (51.7% - 56.0%) | 52.0% (47.3% - 56.9%) | 49.4% (45.7% - 51.4%) |
| Dispatch priority D*       | all n (%)               | 107 (6.2%)            | 112 (6.2%)            | 128 (6.9%)            | 143 (10.4%)           |
|                            | n per week median (IQR) | 7.0 (7.0 - 10.0)      | 8.0 (7.0 - 10.0)      | 10.0 (7.0 - 13.0)     | 10.0 (8.0 - 12.0)     |
|                            | % per week median (IQR) | 5.7% (4.8% - 7.1%)    | 5.8% (4.7% - 7.3%)    | 5.9% (5.6% - 8.8%)    | 9.5% (8.1% - 11.4%)   |
| Transported patients       | all n (%)               | 902 (52.4%)           | 930 (51.6%)           | 950 (51.2%)           | 578 (42.3%)           |
|                            | n per week median (IQR) | 67.0 (64.0 - 71.0)    | 74.0 (65.0 - 79.0)    | 71.0 (65.0 - 78.0)    | 36.0 (34.0 - 54.0)    |
|                            | % per week median (IQR) | 51.8% (50.0% - 55.7%) | 50.9% (48.0% - 55.6%) | 52.5% (48.5% - 53.8%) | 41.9% (39.1% - 44.8%) |
| Transportation priority A* | all n (%)               | 8 (0.5%)              | 15 (0.8%)             | 14 (0.8%)             | 6 (0.4%)              |
|                            | n per week median (IQR) | 1.0 (1.0 - 1.8)       | 1.0 (1.0 - 2.0)       | 1.0 (1.0 - 2.0)       | 1.0 (1.0 - 1.0)       |
|                            | % per week median (IQR) | 0.9% (0.8% - 1.2%)    | 0.8% (0.7% - 1.4%)    | 0.8% (0.7% - 1.3%)    | 1.2% (0.9% - 1.2%)    |
| Transportation priority B* | all n (%)               | 89 (5.2%)             | 84 (4.7%)             | 104 (5.6%)            | 62 (4.5%)             |
|                            | n per week median (IQR) | 6.0 (5.0 - 8.0)       | 7.0 (4.0 - 8.0)       | 8.0 (5.0 - 11.0)      | 5.0 (3.0 - 5.0)       |
|                            | % per week median (IQR) | 4.7% (3.9% - 5.7%)    | 5.1% (3.4% - 5.5%)    | 6.4% (3.4% - 6.6%)    | 5.0% (3.5% - 5.7%)    |
| Transportation priority C* | all n (%)               | 587 (34.1%)           | 601 (33.4%)           | 618 (33.3%)           | 398 (29.2%)           |
|                            | n per week median (IQR) | 44.0 (40.0 - 47.0)    | 47.0 (42.0 - 50.0)    | 45.0 (41.0 - 50.0)    | 25.0 (22.0 - 41.0)    |
|                            | % per week median (IQR) | 33.3% (32.0% - 36.6%) | 34.2% (30.4% - 37.1%) | 33.3% (29.6% - 35.1%) | 29.1% (25.6% - 31.2%) |
| Transportation priority D* | all n (%)               | 218 (12.7%)           | 230 (12.8%)           | 213 (11.5%)           | 113 (8.3%)            |
|                            | n per week median (IQR) | 15.0 (13.0 - 20.0)    | 17.0 (14.0 - 21.0)    | 15.0 (14.0 - 19.0)    | 7.0 (6.0 - 9.0)       |
|                            | % per week median (IQR) | 13.0% (10.3% - 14.6%) | 12.9% (11.7% - 14.4%) | 11.3% (9.9% - 13.2%)  | 7.4% (6.6% - 8.6%)    |
| Trauma patients            | all n (%)               | 605 (35.1%)           | 564 (31.3%)           | 649 (34.9%)           | 504 (36.8%)           |
|                            | n per week median (IQR) | 42.0 (40.0 - 50.0)    | 41.0 (33.0 - 48.0)    | 50.0 (40.0 - 56.0)    | 36.0 (31.0 - 41.0)    |
|                            | % per week median (IQR) | 33.8% (30.5% - 38.1%) | 28.4% (25.5% - 32.9%) | 34.0% (29.3% - 40.7%) | 39.0% (33.3% - 41.7%) |
| Non-transported patients   | all n (%)               | 820 (47.6%)           | 871 (48.4%)           | 907 (48.9%)           | 786 (57.6%)           |
|                            | n per week median (IQR) | 64.0 (58.0 - 70.0)    | 63.0 (61.0 - 72.0)    | 68.0 (63.0 - 78.0)    | 56.0 (50.0 - 68.0)    |
|                            | % per week median (IQR) | 48.2% (44.3% - 50.0%) | 49.1% (44.4% - 52.0%) | 47.5% (46.4% - 51.5%) | 58.1% (55.2% - 60.9%) |

2 \* the priority class from A to D refers to the urgency of the dispatch /transportation and /or to  
 3 the risk of the symptom to a patient – A being the contact with highest urgency and risk and D the  
 4 lowest urgency and risk  
 5 EMS = Emergency Medical Services  
 6 IQR = Interquartile Range

1 **Supplementary Table 4. Change in the interventions performed on-scene**

|                                        |                         | 2017                  | 2018                  | 2019                  | 2020                  |
|----------------------------------------|-------------------------|-----------------------|-----------------------|-----------------------|-----------------------|
| additional help requested              | all n (%)               | 81 (4.7%)             | 74 (4.1%)             | 105 (5.7%)            | 94 (6.9%)             |
|                                        | n per week median (IQR) | 6.0 (5.0 - 6.0)       | 5.0 (3.0 - 8.0)       | 7.0 (5.0 - 7.0)       | 7.0 (5.0 - 9.0)       |
|                                        | % per week median (IQR) | 4.1% (3.9% - 4.7%)    | 3.4% (2.6% - 4.9%)    | 4.5% (4.1% - 5.4%)    | 6.8% (4.5% - 8.5%)    |
| MICU on-scene                          | all n (%)               | 25 (1.5%)             | 23 (1.3%)             | 30 (1.6%)             | 24 (1.8%)             |
|                                        | n per week median (IQR) | 2.0 (1.8 - 2.2)       | 2.0 (1.5 - 2.0)       | 2.0 (1.5 - 3.5)       | 2.0 (2.0 - 2.8)       |
|                                        | % per week median (IQR) | 1.6% (1.2% - 1.9%)    | 1.4% (1.0% - 1.7%)    | 1.6% (1.1% - 2.6%)    | 2.3% (1.4% - 2.5%)    |
| emergency physician consulted by phone | all n (%)               | 308 (17.9%)           | 261 (14.5%)           | 305 (16.4%)           | 236 (17.2%)           |
|                                        | n per week median (IQR) | 23.0 (22.0 - 27.0)    | 20.0 (18.0 - 23.0)    | 23.0 (21.0 - 25.0)    | 18.0 (15.0 - 20.0)    |
|                                        | % per week median (IQR) | 17.9% (16.8% - 20.0%) | 15.4% (11.6% - 17.6%) | 16.0% (14.3% - 18.5%) | 17.6% (15.6% - 18.1%) |
| any measurements done on-scene         | all n (%)               | 1615 (93.7%)          | 1695 (94.1%)          | 1769 (95.2%)          | 1280 (93.5%)          |
|                                        | n per week median (IQR) | 120.0 (116.0 - 130.0) | 131.0 (112.0 - 141.0) | 135.0 (121.0 - 144.0) | 88.0 (78.0 - 124.0)   |
|                                        | % per week median (IQR) | 93.0% (92.2% - 94.9%) | 94.9% (93.0% - 95.5%) | 95.7% (93.8% - 96.3%) | 93.9% (91.9% - 95.3%) |
| intubation*                            | all n (%)               | 2 (0.1%)              | 3 (0.2%)              | 1 (0.1%)              | 3 (0.2%)              |
|                                        | n per week median (IQR) | 1.0 (1.0 - 1.0)       | 1.0 (1.0 - 1.0)       | 1.0 (1.0 - 1.0)       | 1.5 (1.2 - 1.8)       |
|                                        | % per week median (IQR) | 0.8% (0.8% - 0.8%)    | 0.7% (0.7% - 0.7%)    | 0.6% (0.6% - 0.6%)    | 1.3% (1.2% - 1.3%)    |
| supplementary oxygen given             | all n (%)               | 38 (2.2%)             | 47 (2.6%)             | 40 (2.2%)             | 16 (1.2%)             |
|                                        | n per week median (IQR) | 3.0 (2.0 - 4.0)       | 3.0 (2.0 - 5.0)       | 3.0 (2.0 - 4.5)       | 2.0 (1.0 - 2.2)       |
|                                        | % per week median (IQR) | 2.4% (1.6% - 2.8%)    | 2.2% (1.7% - 3.6%)    | 2.4% (1.3% - 3.0%)    | 1.5% (1.2% - 2.4%)    |
| intravenous connection established     | all n (%)               | 128 (7.4%)            | 123 (6.8%)            | 149 (8.0%)            | 65 (4.7%)             |
|                                        | n per week median (IQR) | 10.0 (8.0 - 11.0)     | 9.0 (7.0 - 11.0)      | 10.0 (10.0 - 14.0)    | 5.0 (3.0 - 7.0)       |
|                                        | % per week median (IQR) | 8.5% (5.6% - 8.7%)    | 6.4% (5.8% - 7.5%)    | 8.0% (6.5% - 8.9%)    | 4.4% (2.9% - 5.8%)    |
| any medication given                   | all n (%)               | 170 (9.9%)            | 206 (11.4%)           | 209 (11.2%)           | 111 (8.1%)            |
|                                        | n per week median (IQR) | 14.0 (12.0 - 15.0)    | 14.0 (14.0 - 18.0)    | 15.0 (13.0 - 18.0)    | 7.0 (6.0 - 9.0)       |
|                                        | % per week median (IQR) | 10.4% (8.8% - 12.1%)  | 10.3% (9.6% - 12.5%)  | 10.7% (9.0% - 13.1%)  | 7.6% (6.6% - 9.1%)    |

2 \* not enough data for calculating difference in intubation rates

3 \*\* invasive means any intravenous or intranasal or intramuscular or intraosseal medication given

4 MICU = mobile intensive care unit

1  
2  
3  
4  
5  
6  
7  
8  
9  
10  
11  
12  
13  
14  
15  
16  
17  
18  
19  
20  
21  
22  
23  
24  
25  
26  
27  
28  
29  
30  
31  
32  
33  
34  
35  
36  
37  
38  
39  
40  
41  
42  
43  
44  
45  
46

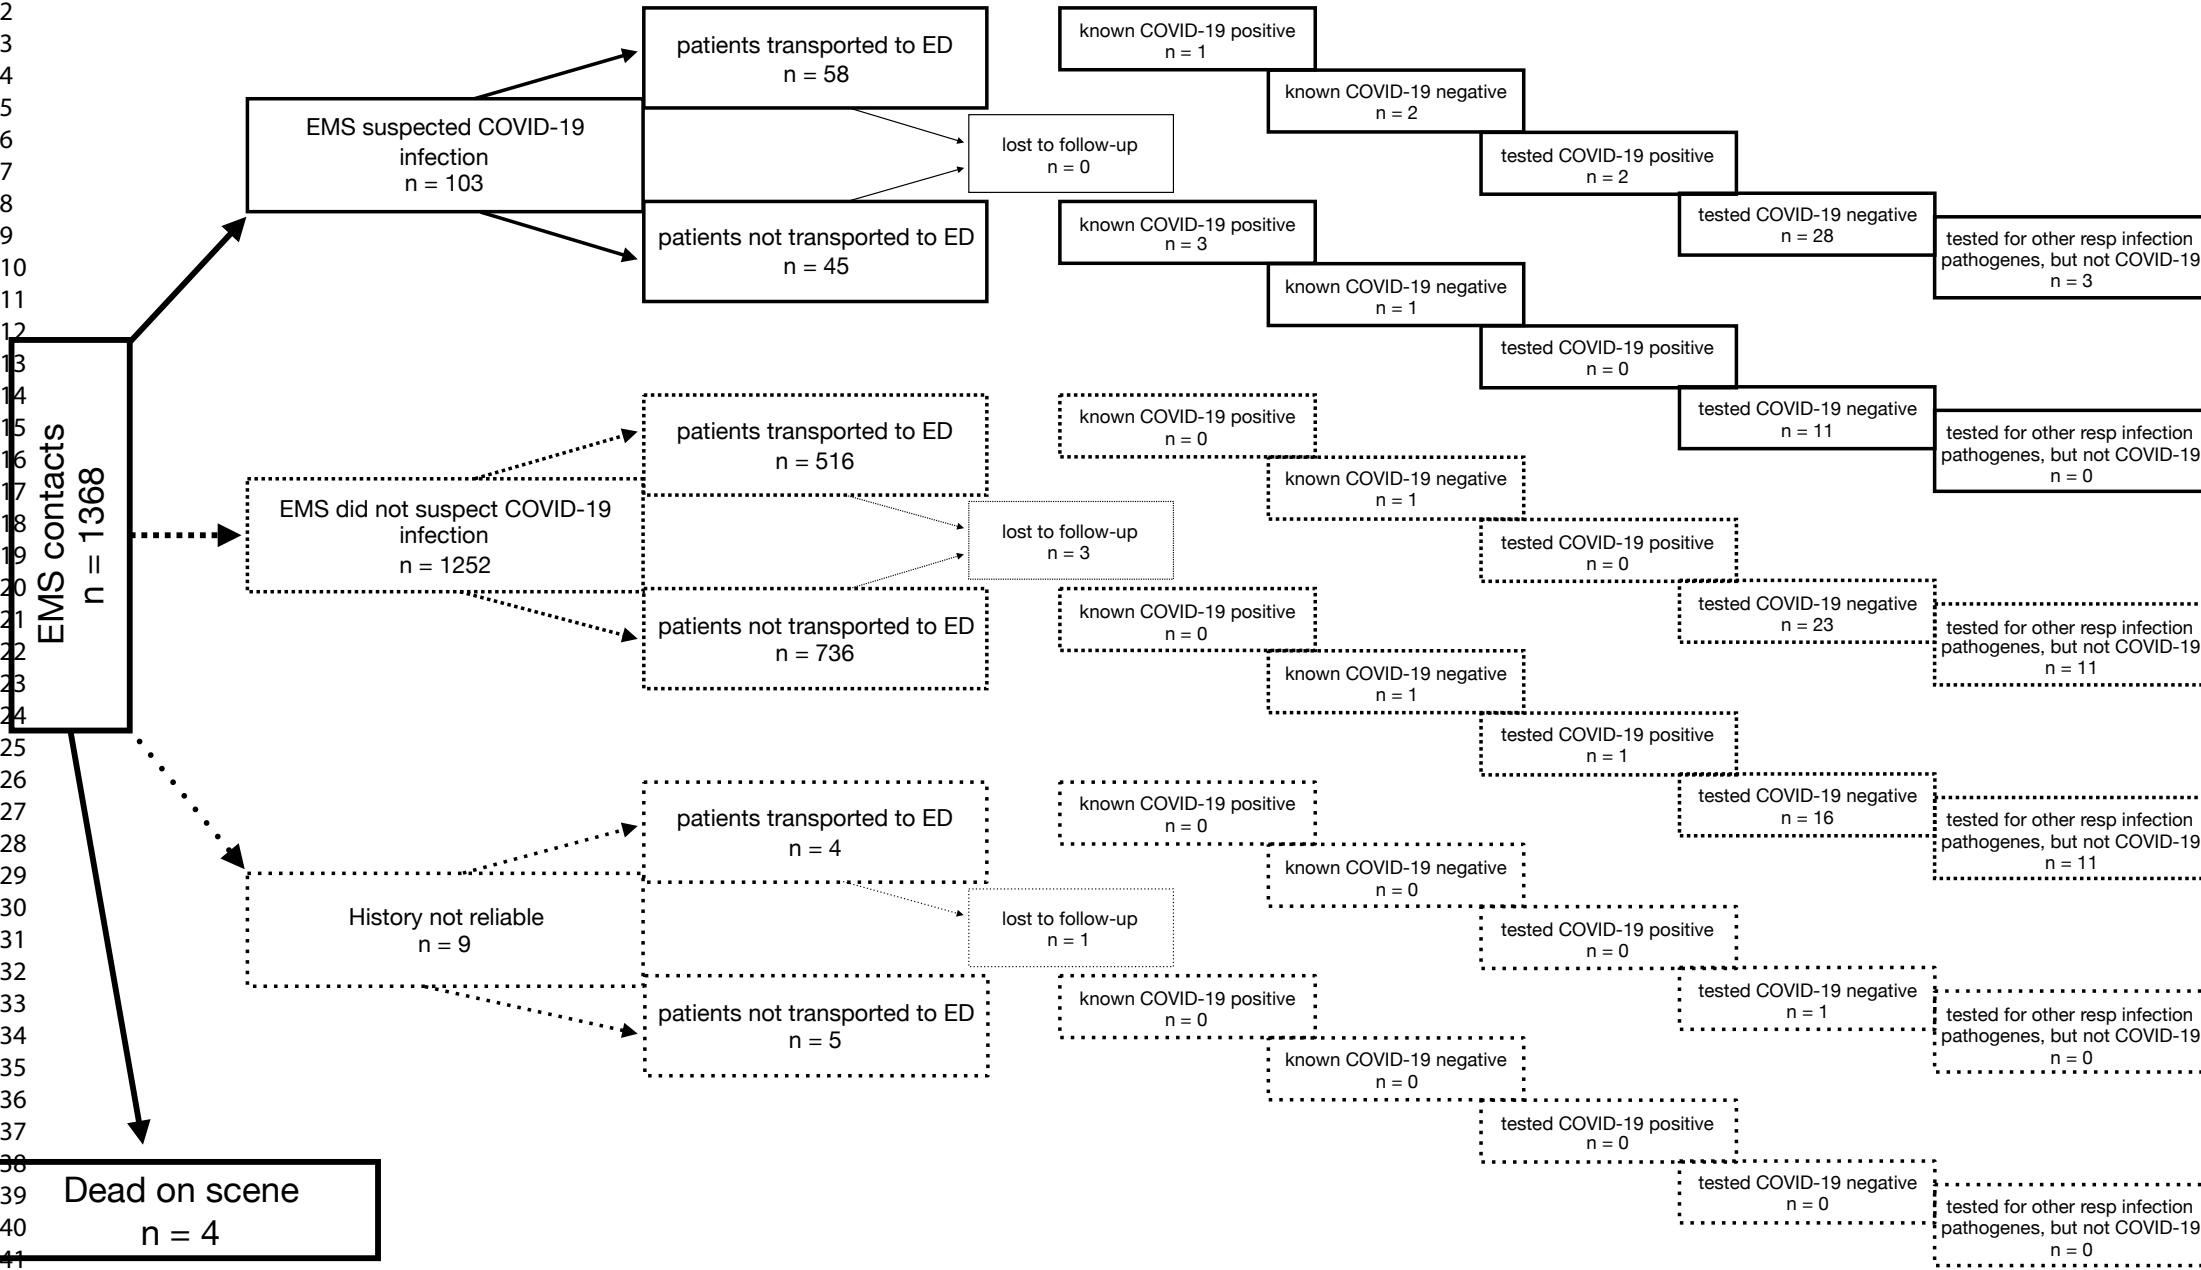

**STROBE 2007 (v4) Statement—Checklist of items that should be included in reports of cohort studies**

| Section/Topic            | Item # | Recommendation                                                                                                                                                                       | Reported on page #       |
|--------------------------|--------|--------------------------------------------------------------------------------------------------------------------------------------------------------------------------------------|--------------------------|
| Title and abstract       | 1      | (a) Indicate the study’s design with a commonly used term in the title or the abstract                                                                                               | #1                       |
|                          |        | (b) Provide in the abstract an informative and balanced summary of what was done and what was found                                                                                  | #4                       |
| <b>Introduction</b>      |        |                                                                                                                                                                                      |                          |
| Background/rationale     | 2      | Explain the scientific background and rationale for the investigation being reported                                                                                                 | #5                       |
| Objectives               | 3      | State specific objectives, including any prespecified hypotheses                                                                                                                     | #5                       |
| <b>Methods</b>           |        |                                                                                                                                                                                      |                          |
| Study design             | 4      | Present key elements of study design early in the paper                                                                                                                              | #5-#8                    |
| Setting                  | 5      | Describe the setting, locations, and relevant dates, including periods of recruitment, exposure, follow-up, and data collection                                                      | #6-#8                    |
| Participants             | 6      | (a) Give the eligibility criteria, and the sources and methods of selection of participants. Describe methods of follow-up                                                           | #6-#8                    |
|                          |        | (b) For matched studies, give matching criteria and number of exposed and unexposed                                                                                                  | n/a                      |
| Variables                | 7      | Clearly define all outcomes, exposures, predictors, potential confounders, and effect modifiers. Give diagnostic criteria, if applicable                                             | #6-#8                    |
| Data sources/measurement | 8*     | For each variable of interest, give sources of data and details of methods of assessment (measurement). Describe comparability of assessment methods if there is more than one group | #6-#8                    |
| Bias                     | 9      | Describe any efforts to address potential sources of bias                                                                                                                            | #5, #15                  |
| Study size               | 10     | Explain how the study size was arrived at                                                                                                                                            | #6-#8                    |
| Quantitative variables   | 11     | Explain how quantitative variables were handled in the analyses. If applicable, describe which groupings were chosen and why                                                         | #7-#8                    |
| Statistical methods      | 12     | (a) Describe all statistical methods, including those used to control for confounding                                                                                                | #7-#8                    |
|                          |        | (b) Describe any methods used to examine subgroups and interactions                                                                                                                  | n/a                      |
|                          |        | (c) Explain how missing data were addressed                                                                                                                                          | n/a                      |
|                          |        | (d) If applicable, explain how loss to follow-up was addressed                                                                                                                       | Supplementary Material 2 |
|                          |        | (e) Describe any sensitivity analyses                                                                                                                                                | n/a                      |

| <b>Results</b>           |     |                                                                                                                                                                                                              |                                      |
|--------------------------|-----|--------------------------------------------------------------------------------------------------------------------------------------------------------------------------------------------------------------|--------------------------------------|
| Participants             | 13* | (a) Report numbers of individuals at each stage of study—eg numbers potentially eligible, examined for eligibility, confirmed eligible, included in the study, completing follow-up, and analysed            | Supplementary Material 1 and 2       |
|                          |     | (b) Give reasons for non-participation at each stage                                                                                                                                                         | n/a                                  |
|                          |     | (c) Consider use of a flow diagram                                                                                                                                                                           | Supplementary Material 2             |
| Descriptive data         | 14* | (a) Give characteristics of study participants (eg demographic, clinical, social) and information on exposures and potential confounders                                                                     | Supplementary Material 1             |
|                          |     | (b) Indicate number of participants with missing data for each variable of interest                                                                                                                          | Supplementary Material 2             |
|                          |     | (c) Summarise follow-up time (eg, average and total amount)                                                                                                                                                  | Figure 1, Supplementary Material 1,2 |
| Outcome data             | 15* | Report numbers of outcome events or summary measures over time                                                                                                                                               | Table 1-3, Supplementary Material 1  |
| Main results             | 16  | (a) Give unadjusted estimates and, if applicable, confounder-adjusted estimates and their precision (eg, 95% confidence interval). Make clear which confounders were adjusted for and why they were included | Table 1,2, Supplementary Material 1  |
|                          |     | (b) Report category boundaries when continuous variables were categorized                                                                                                                                    | n/a                                  |
|                          |     | (c) If relevant, consider translating estimates of relative risk into absolute risk for a meaningful time period                                                                                             | n/a                                  |
| Other analyses           | 17  | Report other analyses done—eg analyses of subgroups and interactions, and sensitivity analyses                                                                                                               | Supplementary Material 1             |
| <b>Discussion</b>        |     |                                                                                                                                                                                                              |                                      |
| Key results              | 18  | Summarise key results with reference to study objectives                                                                                                                                                     | #11                                  |
| <b>Limitations</b>       |     |                                                                                                                                                                                                              |                                      |
| Interpretation           | 20  | Give a cautious overall interpretation of results considering objectives, limitations, multiplicity of analyses, results from similar studies, and other relevant evidence                                   | #11-15                               |
| Generalisability         | 21  | Discuss the generalisability (external validity) of the study results                                                                                                                                        | #14-15                               |
| <b>Other information</b> |     |                                                                                                                                                                                                              |                                      |

1  
2  
3  
4  
5  
6  
7  
8  
9  
10  
11  
12  
13  
14  
15  
16  
17  
18  
19  
20  
21  
22  
23  
24  
25  
26  
27  
28  
29  
30  
31  
32  
33  
34  
35  
36  
37  
38  
39  
40  
41  
42  
43  
44  
45  
46

|         |    |                                                                                                                                                               |     |
|---------|----|---------------------------------------------------------------------------------------------------------------------------------------------------------------|-----|
| Funding | 22 | Give the source of funding and the role of the funders for the present study and, if applicable, for the original study on which the present article is based | #16 |
|---------|----|---------------------------------------------------------------------------------------------------------------------------------------------------------------|-----|

\*Give information separately for cases and controls in case-control studies and, if applicable, for exposed and unexposed groups in cohort and cross-sectional studies.

**Note:** An Explanation and Elaboration article discusses each checklist item and gives methodological background and published examples of transparent reporting. The STROBE checklist is best used in conjunction with this article (freely available on the Web sites of PLoS Medicine at <http://www.plosmedicine.org/>, Annals of Internal Medicine at <http://www.annals.org/>, and Epidemiology at <http://www.epidem.com/>). Information on the STROBE Initiative is available at [www.strobe-statement.org](http://www.strobe-statement.org).

Confidential: For Review Only
