# Supplementary material for: Paediatric prehospital emergencies and restrictions during the COVID-19 pandemic: a population-based study
Source: PubMed Central journal article supplement — BMJ Paediatr Open. 2020 Nov 2;4(1):e000808. doi: 10.1136/bmjpo-2020-000808 (PMC7607513; doi:10.1136/bmjpo-2020-000808), 2020-11-02
Supplement: bmjpo-2020-000808supp001.pdf [file bmjpo-2020-000808supp001.pdf]

1 **Supplementary Material 1: Supplementary statistics**

2

3 **Supplementary Table 1. Descriptive statistics.**

|                                      |                         | 2017                  | 2018                  | 2019                  | 2020                  |
|--------------------------------------|-------------------------|-----------------------|-----------------------|-----------------------|-----------------------|
| Age (years)                          |                         | 6.4<br>(2.0 - 13.2)   | 6.5<br>(1.9 - 12.6)   | 6.3<br>(2.1 - 12.5)   | 5.3<br>(1.8 - 12.0)   |
| Sex (male)                           | all n (%)               | 915 (53.2%)           | 980 (54.6%)           | 1001 (54.1%)          | 753 (55.1%)           |
|                                      | n per week median (IQR) | 67.0 (61.0 - 82.0)    | 75.0 (65.0 - 80.0)    | 76.0 (71.0 - 80.0)    | 53.0 (48.0 - 70.0)    |
|                                      | % per week median (IQR) | 55.3% (51.7% - 55.6%) | 55.2% (53.7% - 56.1%) | 52.3% (51.8% - 58.3%) | 54.3% (52.7% - 56.2%) |
| Native language (Finnish or Swedish) | all n (%)               | 1327 (81.8%)          | 1310 (77.7%)          | 1377 (79.1%)          | 991 (74.7%)           |
|                                      | n per week median (IQR) | 104.0 (91.0 - 109.0)  | 104.0 (91.0 - 106.0)  | 102.0 (95.0 - 110.0)  | 69.0 (66.0 - 91.0)    |
|                                      | % per week median (IQR) | 82.6% (78.8% - 84.8%) | 77.5% (76.3% - 79.1%) | 79.7% (76.8% - 80.7%) | 72.8% (71.8% - 78.4%) |

4 IQR = Interquartile Range

5

6

1 **Supplementary Table 2.** The number of EMS contacts during the control periods for each month and  
2 their proportions (%) of all control-period EMS contacts. The Chi-squared test was used to calculate the  
3 significance of the variation within the control periods.

4

| Year | March     | April     | June      | p    |
|------|-----------|-----------|-----------|------|
| 2017 | 602 (11%) | 516 (10%) | 606 (11%) | 0,10 |
| 2018 | 621 (12%) | 524 (10%) | 656 (12%) |      |
| 2019 | 643 (12%) | 606 (11%) | 609 (11%) |      |

5

1 **Supplementary Table 3. Change in the dispatch and transportation codes.**

|                            |                         | 2017                  | 2018                  | 2019                  | 2020                  |
|----------------------------|-------------------------|-----------------------|-----------------------|-----------------------|-----------------------|
| All EMS contacts           | all n (%)               | 1724 (100.0%)         | 1801 (100.0%)         | 1858 (100.0%)         | 1369 (100.0%)         |
|                            | n per week median (IQR) | 128.0 (122.0 - 140.0) | 142.0 (125.0 - 146.0) | 142.0 (130.0 - 152.0) | 91.0 (86.0 - 132.0)   |
| Dispatch priority A*       | all n (%)               | 42 (2.4%)             | 43 (2.4%)             | 81 (4.4%)             | 90 (6.6%)             |
|                            | n per week median (IQR) | 3.0 (2.0 - 4.0)       | 3.0 (2.0 - 4.0)       | 5.0 (2.0 - 5.0)       | 8.0 (7.0 - 8.0)       |
|                            | % per week median (IQR) | 2.3% (1.6% - 2.6%)    | 2.1% (1.6% - 2.9%)    | 3.3% (1.6% - 4.1%)    | 6.1% (5.7% - 8.4%)    |
| Dispatch priority B*       | all n (%)               | 693 (40.2%)           | 677 (37.6%)           | 702 (37.8%)           | 478 (34.9%)           |
|                            | n per week median (IQR) | 53.0 (47.0 - 58.0)    | 49.0 (46.0 - 53.0)    | 53.0 (46.0 - 59.0)    | 37.0 (30.0 - 43.0)    |
|                            | % per week median (IQR) | 38.8% (37.3% - 42.3%) | 39.0% (32.4% - 40.4%) | 38.7% (34.4% - 40.7%) | 36.1% (31.5% - 38.1%) |
| Dispatch priority C*       | all n (%)               | 882 (51.2%)           | 969 (53.8%)           | 947 (51.0%)           | 658 (48.1%)           |
|                            | n per week median (IQR) | 65.0 (63.0 - 70.0)    | 74.0 (69.0 - 86.0)    | 72.0 (69.0 - 80.0)    | 44.0 (43.0 - 57.0)    |
|                            | % per week median (IQR) | 52.1% (50.4% - 54.3%) | 54.0% (51.7% - 56.0%) | 52.0% (47.3% - 56.9%) | 49.4% (45.7% - 51.4%) |
| Dispatch priority D*       | all n (%)               | 107 (6.2%)            | 112 (6.2%)            | 128 (6.9%)            | 143 (10.4%)           |
|                            | n per week median (IQR) | 7.0 (7.0 - 10.0)      | 8.0 (7.0 - 10.0)      | 10.0 (7.0 - 13.0)     | 10.0 (8.0 - 12.0)     |
|                            | % per week median (IQR) | 5.7% (4.8% - 7.1%)    | 5.8% (4.7% - 7.3%)    | 5.9% (5.6% - 8.8%)    | 9.5% (8.1% - 11.4%)   |
| Transported patients       | all n (%)               | 902 (52.4%)           | 930 (51.6%)           | 950 (51.2%)           | 578 (42.3%)           |
|                            | n per week median (IQR) | 67.0 (64.0 - 71.0)    | 74.0 (65.0 - 79.0)    | 71.0 (65.0 - 78.0)    | 36.0 (34.0 - 54.0)    |
|                            | % per week median (IQR) | 51.8% (50.0% - 55.7%) | 50.9% (48.0% - 55.6%) | 52.5% (48.5% - 53.8%) | 41.9% (39.1% - 44.8%) |
| Transportation priority A* | all n (%)               | 8 (0.5%)              | 15 (0.8%)             | 14 (0.8%)             | 6 (0.4%)              |
|                            | n per week median (IQR) | 1.0 (1.0 - 1.8)       | 1.0 (1.0 - 2.0)       | 1.0 (1.0 - 2.0)       | 1.0 (1.0 - 1.0)       |
|                            | % per week median (IQR) | 0.9% (0.8% - 1.2%)    | 0.8% (0.7% - 1.4%)    | 0.8% (0.7% - 1.3%)    | 1.2% (0.9% - 1.2%)    |
| Transportation priority B* | all n (%)               | 89 (5.2%)             | 84 (4.7%)             | 104 (5.6%)            | 62 (4.5%)             |
|                            | n per week median (IQR) | 6.0 (5.0 - 8.0)       | 7.0 (4.0 - 8.0)       | 8.0 (5.0 - 11.0)      | 5.0 (3.0 - 5.0)       |
|                            | % per week median (IQR) | 4.7% (3.9% - 5.7%)    | 5.1% (3.4% - 5.5%)    | 6.4% (3.4% - 6.6%)    | 5.0% (3.5% - 5.7%)    |
| Transportation priority C* | all n (%)               | 587 (34.1%)           | 601 (33.4%)           | 618 (33.3%)           | 398 (29.2%)           |
|                            | n per week median (IQR) | 44.0 (40.0 - 47.0)    | 47.0 (42.0 - 50.0)    | 45.0 (41.0 - 50.0)    | 25.0 (22.0 - 41.0)    |
|                            | % per week median (IQR) | 33.3% (32.0% - 36.6%) | 34.2% (30.4% - 37.1%) | 33.3% (29.6% - 35.1%) | 29.1% (25.6% - 31.2%) |
| Transportation priority D* | all n (%)               | 218 (12.7%)           | 230 (12.8%)           | 213 (11.5%)           | 113 (8.3%)            |
|                            | n per week median (IQR) | 15.0 (13.0 - 20.0)    | 17.0 (14.0 - 21.0)    | 15.0 (14.0 - 19.0)    | 7.0 (6.0 - 9.0)       |
|                            | % per week median (IQR) | 13.0% (10.3% - 14.6%) | 12.9% (11.7% - 14.4%) | 11.3% (9.9% - 13.2%)  | 7.4% (6.6% - 8.6%)    |
| Trauma patients            | all n (%)               | 605 (35.1%)           | 564 (31.3%)           | 649 (34.9%)           | 504 (36.8%)           |
|                            | n per week median (IQR) | 42.0 (40.0 - 50.0)    | 41.0 (33.0 - 48.0)    | 50.0 (40.0 - 56.0)    | 36.0 (31.0 - 41.0)    |
|                            | % per week median (IQR) | 33.8% (30.5% - 38.1%) | 28.4% (25.5% - 32.9%) | 34.0% (29.3% - 40.7%) | 39.0% (33.3% - 41.7%) |
| Non-transported patients   | all n (%)               | 820 (47.6%)           | 871 (48.4%)           | 907 (48.9%)           | 786 (57.6%)           |
|                            | n per week median (IQR) | 64.0 (58.0 - 70.0)    | 63.0 (61.0 - 72.0)    | 68.0 (63.0 - 78.0)    | 56.0 (50.0 - 68.0)    |
|                            | % per week median (IQR) | 48.2% (44.3% - 50.0%) | 49.1% (44.4% - 52.0%) | 47.5% (46.4% - 51.5%) | 58.1% (55.2% - 60.9%) |

2 \* the priority class from A to D refers to the urgency of the dispatch /transportation and /or to  
3 the risk of the symptom to a patient – A being the contact with highest urgency and risk and D the  
4 lowest urgency and risk  
5 EMS = Emergency Medical Services  
6 IQR = Interquartile Range  
7

1 **Supplementary Table 4. Change in the interventions performed on-scene**

|                                        | 2017                    | 2018                  | 2019                  | 2020                  |                       |
|----------------------------------------|-------------------------|-----------------------|-----------------------|-----------------------|-----------------------|
| additional help requested              | all n (%)               | 81 (4.7%)             | 74 (4.1%)             | 105 (5.7%)            | 94 (6.9%)             |
|                                        | n per week median (IQR) | 6.0 (5.0 - 6.0)       | 5.0 (3.0 - 8.0)       | 7.0 (5.0 - 7.0)       | 7.0 (5.0 - 9.0)       |
|                                        | % per week median (IQR) | 4.1% (3.9% - 4.7%)    | 3.4% (2.6% - 4.9%)    | 4.5% (4.1% - 5.4%)    | 6.8% (4.5% - 8.5%)    |
| MICU on-scene                          | all n (%)               | 25 (1.5%)             | 23 (1.3%)             | 30 (1.6%)             | 24 (1.8%)             |
|                                        | n per week median (IQR) | 2.0 (1.8 - 2.2)       | 2.0 (1.5 - 2.0)       | 2.0 (1.5 - 3.5)       | 2.0 (2.0 - 2.8)       |
|                                        | % per week median (IQR) | 1.6% (1.2% - 1.9%)    | 1.4% (1.0% - 1.7%)    | 1.6% (1.1% - 2.6%)    | 2.3% (1.4% - 2.5%)    |
| emergency physician consulted by phone | all n (%)               | 308 (17.9%)           | 261 (14.5%)           | 305 (16.4%)           | 236 (17.2%)           |
|                                        | n per week median (IQR) | 23.0 (22.0 - 27.0)    | 20.0 (18.0 - 23.0)    | 23.0 (21.0 - 25.0)    | 18.0 (15.0 - 20.0)    |
|                                        | % per week median (IQR) | 17.9% (16.8% - 20.0%) | 15.4% (11.6% - 17.6%) | 16.0% (14.3% - 18.5%) | 17.6% (15.6% - 18.1%) |
| any measurements done on-scene         | all n (%)               | 1615 (93.7%)          | 1695 (94.1%)          | 1769 (95.2%)          | 1280 (93.5%)          |
|                                        | n per week median (IQR) | 120.0 (116.0 - 130.0) | 131.0 (112.0 - 141.0) | 135.0 (121.0 - 144.0) | 88.0 (78.0 - 124.0)   |
|                                        | % per week median (IQR) | 93.0% (92.2% - 94.9%) | 94.9% (93.0% - 95.5%) | 95.7% (93.8% - 96.3%) | 93.9% (91.9% - 95.3%) |
| intubation*                            | all n (%)               | 2 (0.1%)              | 3 (0.2%)              | 1 (0.1%)              | 3 (0.2%)              |
|                                        | n per week median (IQR) | 1.0 (1.0 - 1.0)       | 1.0 (1.0 - 1.0)       | 1.0 (1.0 - 1.0)       | 1.5 (1.2 - 1.8)       |
|                                        | % per week median (IQR) | 0.8% (0.8% - 0.8%)    | 0.7% (0.7% - 0.7%)    | 0.6% (0.6% - 0.6%)    | 1.3% (1.2% - 1.3%)    |
| supplementary oxygen given             | all n (%)               | 38 (2.2%)             | 47 (2.6%)             | 40 (2.2%)             | 16 (1.2%)             |
|                                        | n per week median (IQR) | 3.0 (2.0 - 4.0)       | 3.0 (2.0 - 5.0)       | 3.0 (2.0 - 4.5)       | 2.0 (1.0 - 2.2)       |
|                                        | % per week median (IQR) | 2.4% (1.6% - 2.8%)    | 2.2% (1.7% - 3.6%)    | 2.4% (1.3% - 3.0%)    | 1.5% (1.2% - 2.4%)    |
| intravenous connection established     | all n (%)               | 128 (7.4%)            | 123 (6.8%)            | 149 (8.0%)            | 65 (4.7%)             |
|                                        | n per week median (IQR) | 10.0 (8.0 - 11.0)     | 9.0 (7.0 - 11.0)      | 10.0 (10.0 - 14.0)    | 5.0 (3.0 - 7.0)       |
|                                        | % per week median (IQR) | 8.5% (5.6% - 8.7%)    | 6.4% (5.8% - 7.5%)    | 8.0% (6.5% - 8.9%)    | 4.4% (2.9% - 5.8%)    |
| any medication given                   | all n (%)               | 170 (9.9%)            | 206 (11.4%)           | 209 (11.2%)           | 111 (8.1%)            |
|                                        | n per week median (IQR) | 14.0 (12.0 - 15.0)    | 14.0 (14.0 - 18.0)    | 15.0 (13.0 - 18.0)    | 7.0 (6.0 - 9.0)       |
|                                        | % per week median (IQR) | 10.4% (8.8% - 12.1%)  | 10.3% (9.6% - 12.5%)  | 10.7% (9.0% - 13.1%)  | 7.6% (6.6% - 9.1%)    |

2 \* not enough data for calculating difference in intubation rates

3 \*\* invasive means any intravenous or intranasal or intramuscular or intraosseal medication given

4 MICU = mobile intensive care unit
