# Supplementary figures and images for: Paediatric prehospital emergencies and restrictions during the COVID-19 pandemic: a population-based study
Source: PubMed Central journal article supplement — BMJ Paediatr Open. 2020 Nov 2;4(1):e000808. doi: 10.1136/bmjpo-2020-000808 (PMC7607513; doi:10.1136/bmjpo-2020-000808), 2020-11-02

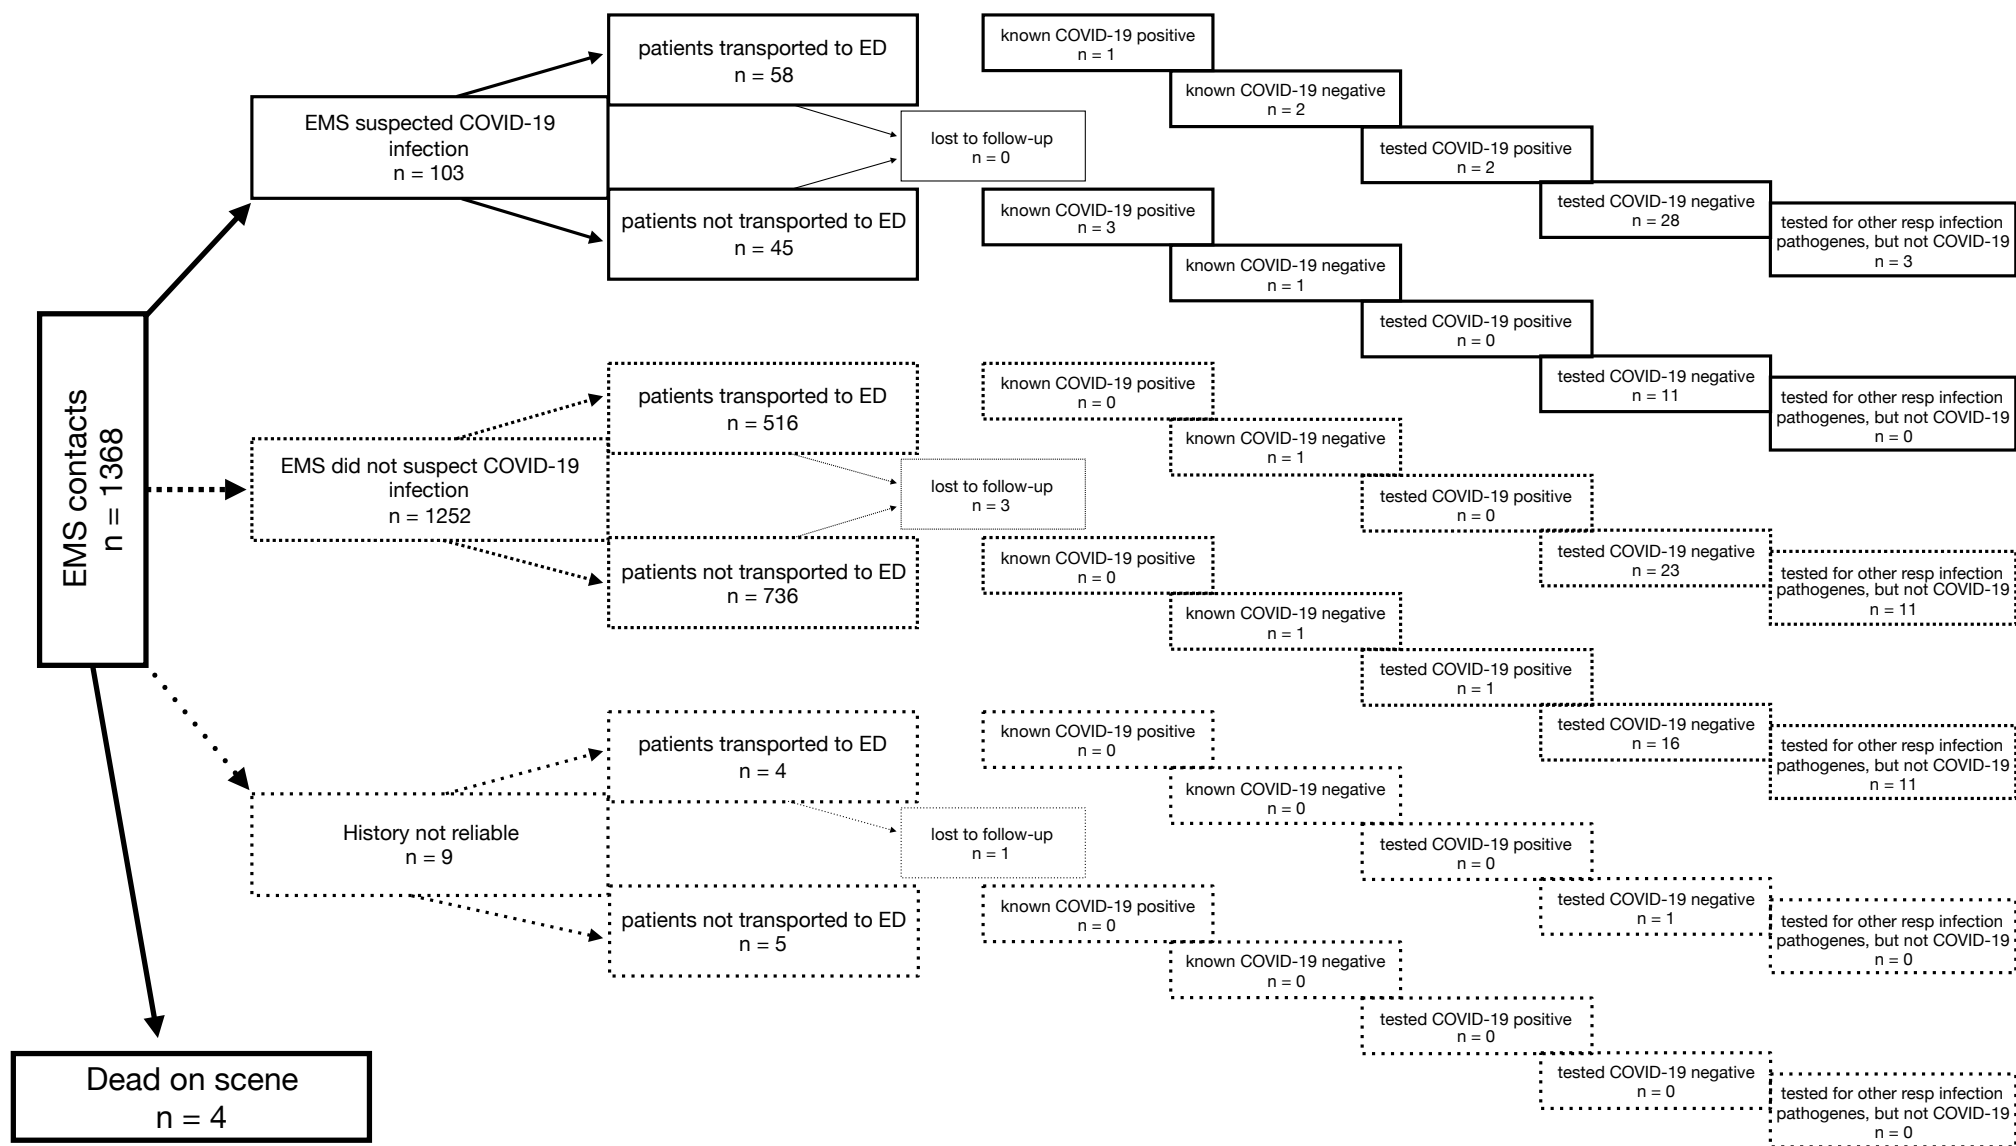

Supplement: bmjpo-2020-000808supp002.pdf [file bmjpo-2020-000808supp002.pdf]
